# Supplementary material for: Microbial transformation of anti-cancer steroid exemestane and cytotoxicity of its metabolites against cancer cell lines
Source: PubMed Central journal article supplement (PMC3637571; doi:10.1186/1752-153x-7-57), 2013-03-27
Supplement: 1752-153X-7-57-S1.pdf [file 1752-153X-7-57-S1.pdf]

Scan: 10

R.T.: .8

Base: m/z 148; 42.9%FS TIC: 10394920

#Ions: 276

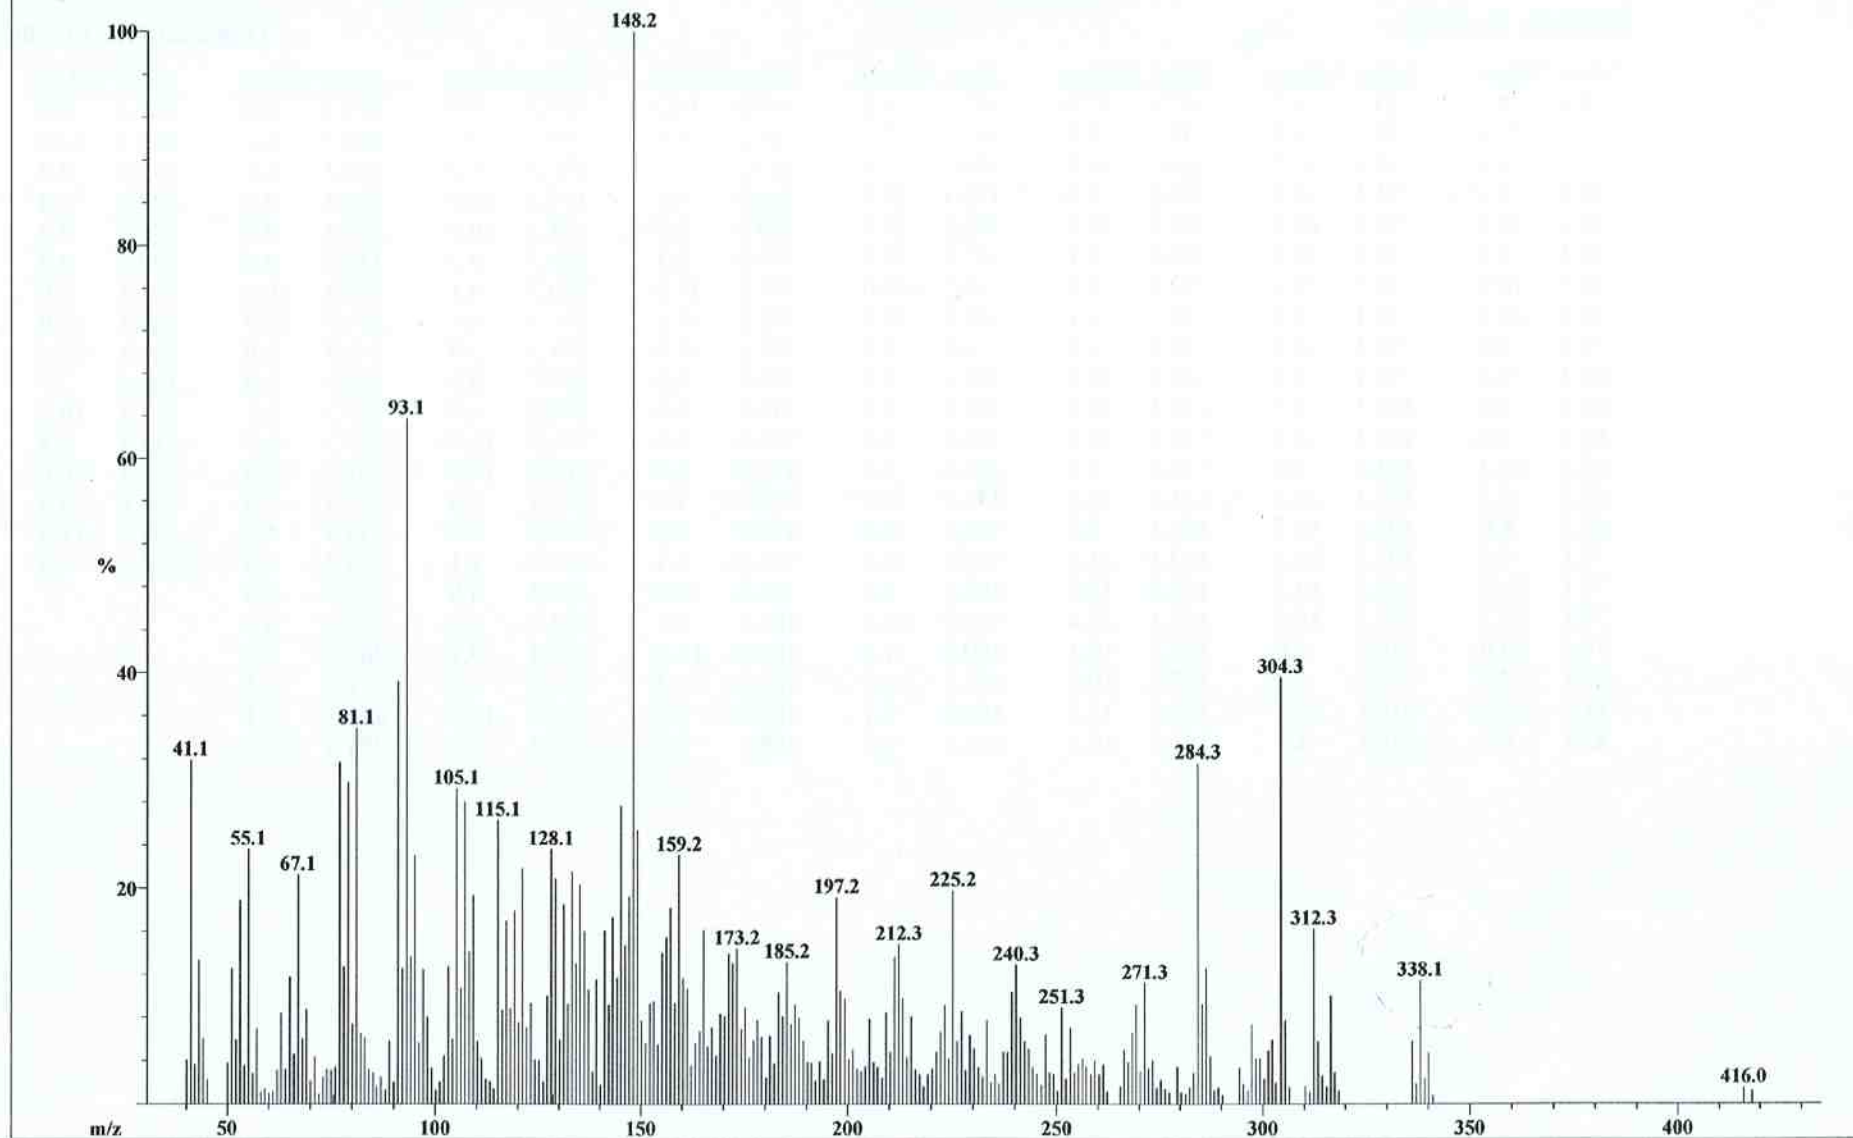

# Scan Graph

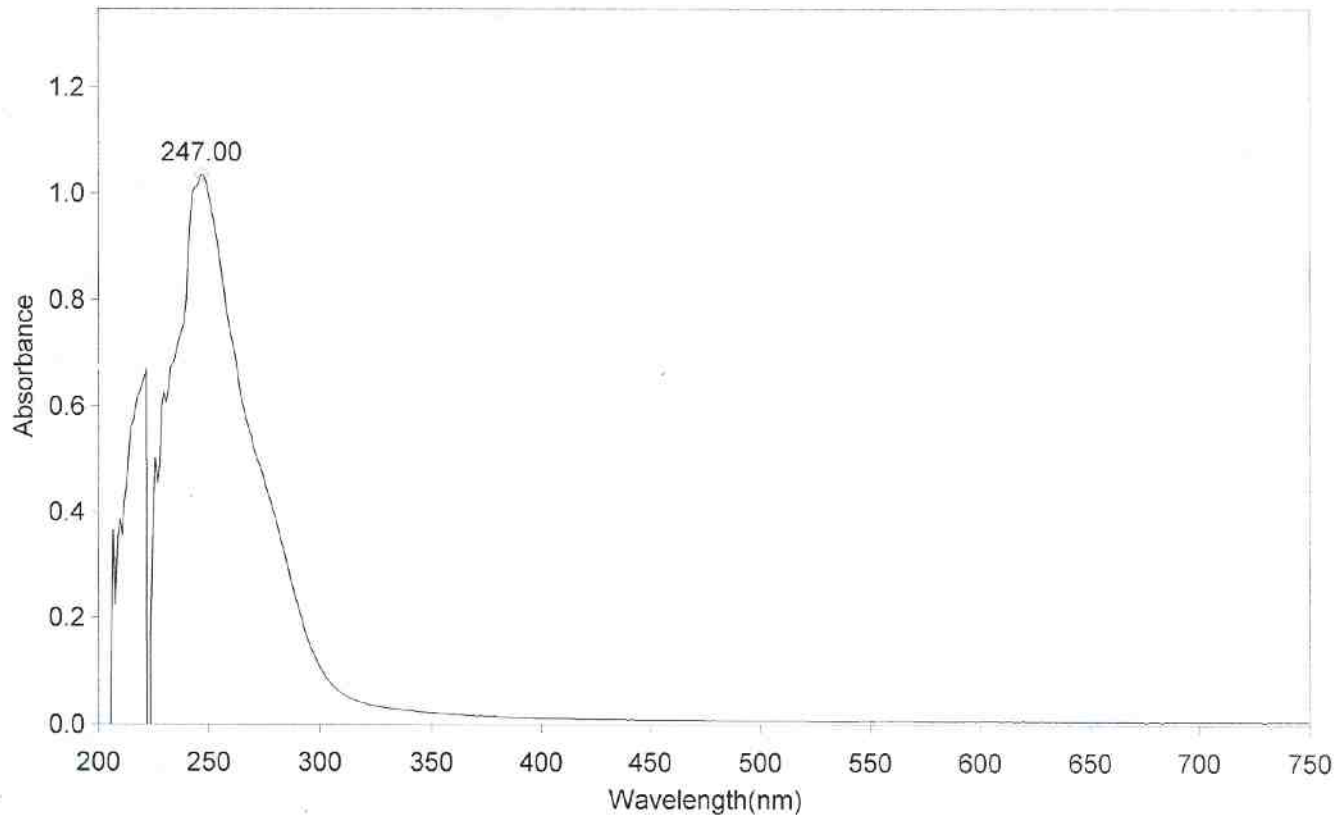

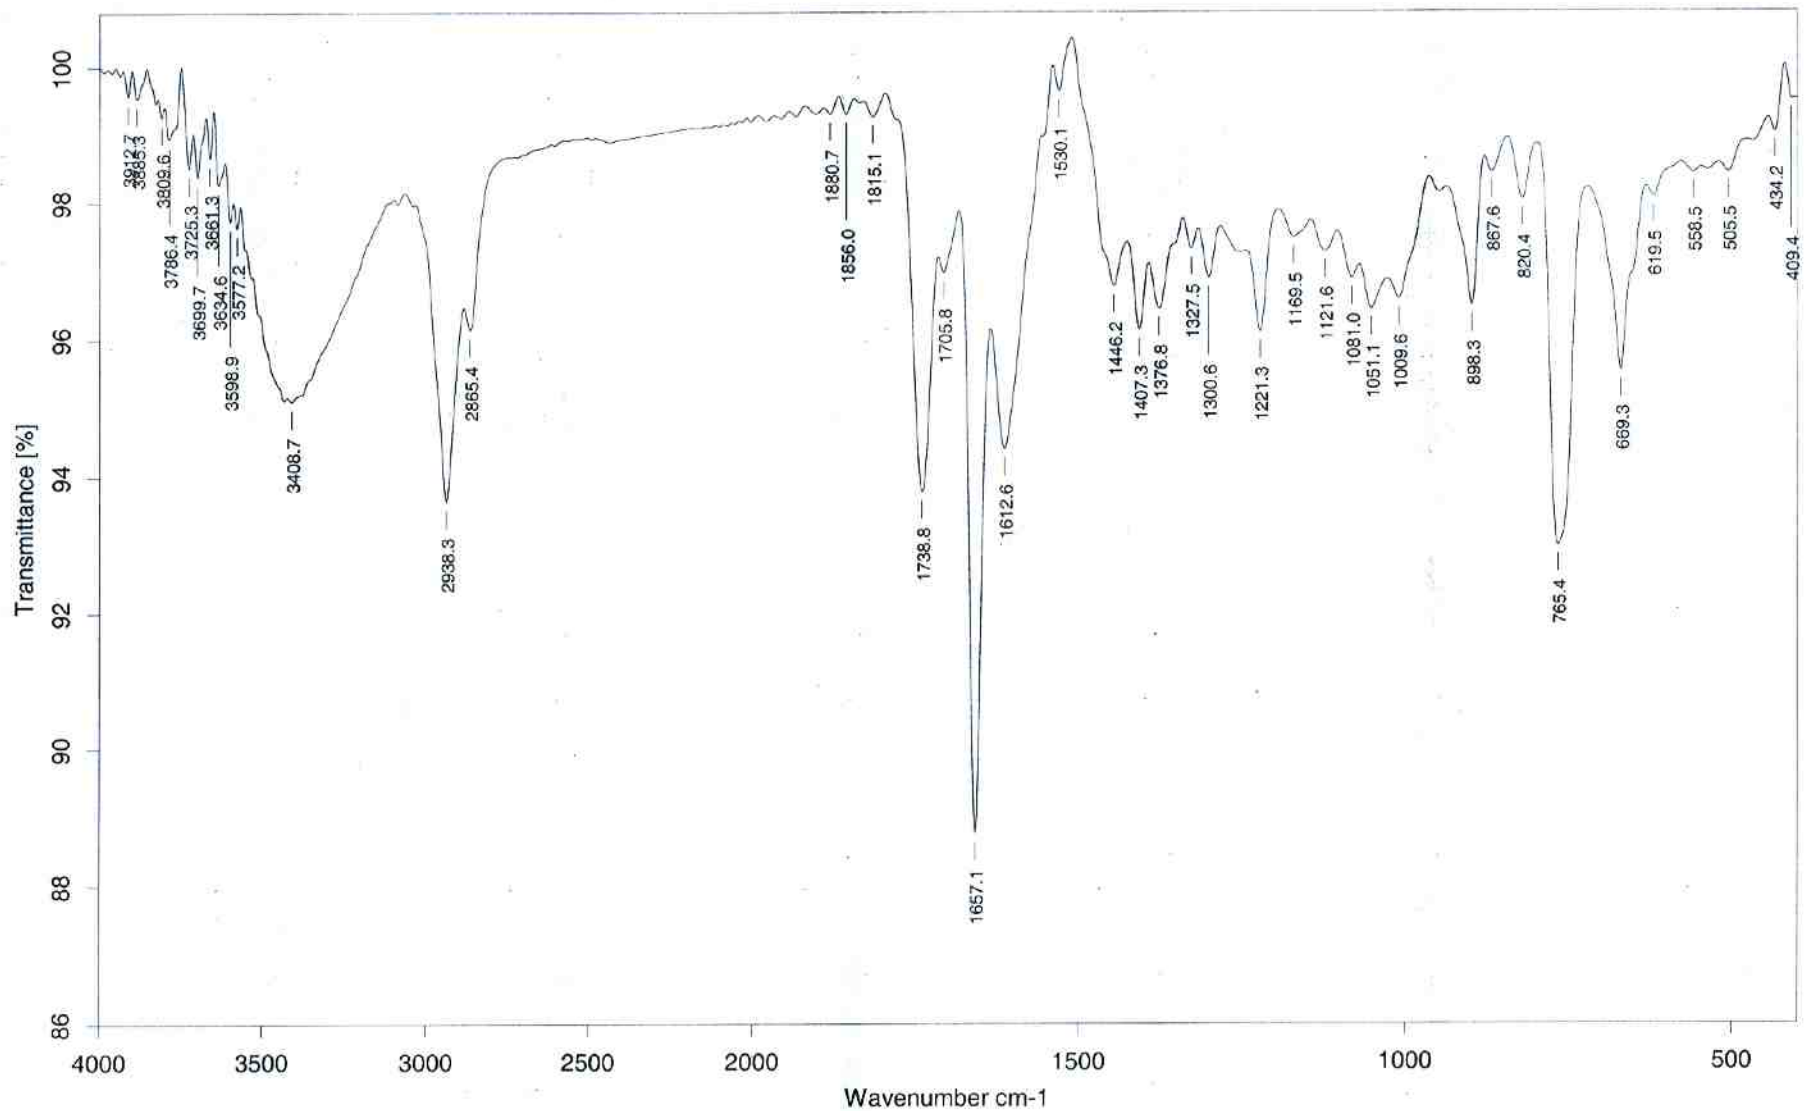

7.221  
7.200  
6.144  
6.140  
6.123  
6.120  
6.004  
6.000  
5.044  
5.040  
5.036  
5.027  
5.023  
4.299  
2.855  
2.821  
2.670  
2.651  
2.094  
2.049  
2.044  
2.040  
2.036  
2.031  
1.983  
1.977  
1.967  
1.962  
1.947  
1.942  
1.938  
1.917  
1.912  
1.908  
1.797  
1.795  
1.776  
1.772  
1.382  
1.362  
1.353  
1.275  
1.187  
0.996

NAME mar09-12  
EXPNO 1  
PROCNO 1  
Date\_ 20120309  
Time\_ 10.47  
INSTRUM spect  
PROBHD 5 mm CPDUL 13C  
PULPROG zg30  
TD 32768  
SOLVENT Acetone  
NS 32  
DS 0  
SWH 10000.000 Hz  
FIDRES 0.305176 Hz  
AQ 1.6385000 sec  
RG 8  
DW 50.000 usec  
DE 6.50 usec  
TE 293.1 K  
D1 1.50000000 sec  
TDO 1

==== CHANNEL f1 =====  
NUC1 1H  
P1 13.50 usec  
PL1 2.00 dB  
PL1W 11.25274181 W  
SFO1 500.3335023 MHz  
SI 32768  
SF 500.3300136 MHz  
WDW EM  
SSB 0  
LB 0.30 Hz  
GB 0  
PC 1.40

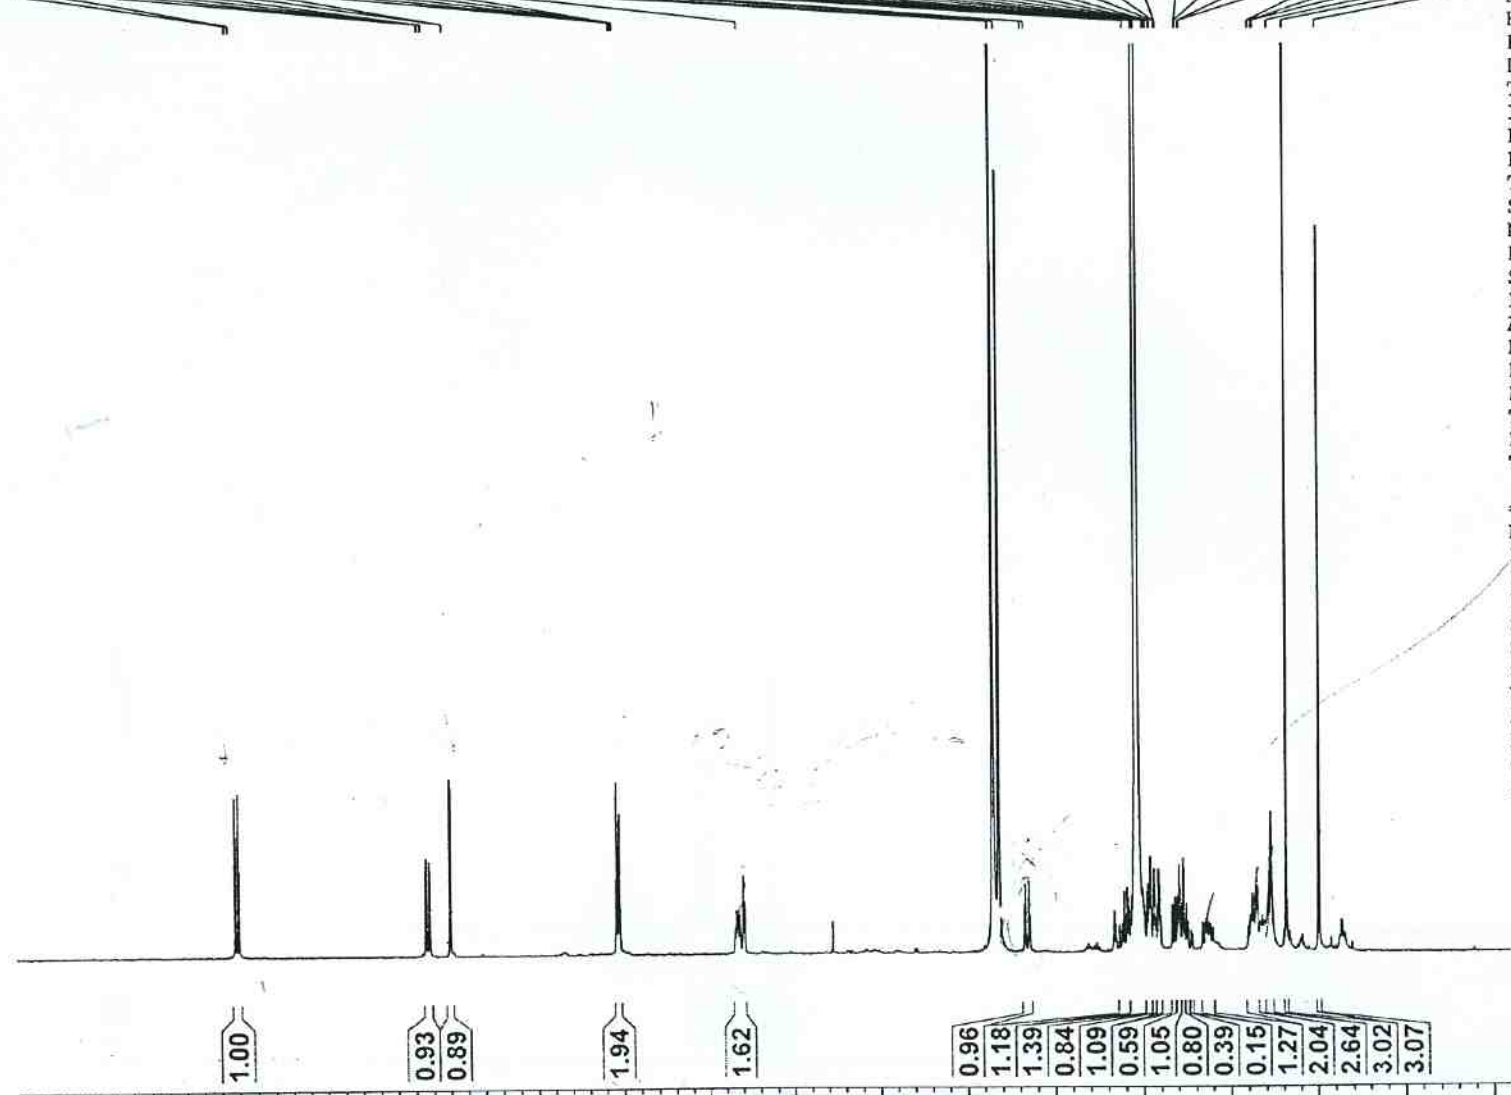

8.0 7.5 7.0 6.5 6.0 5.5 5.0 4.5 4.0 3.5 3.0 2.5 2.0 1.5 1.0 ppm

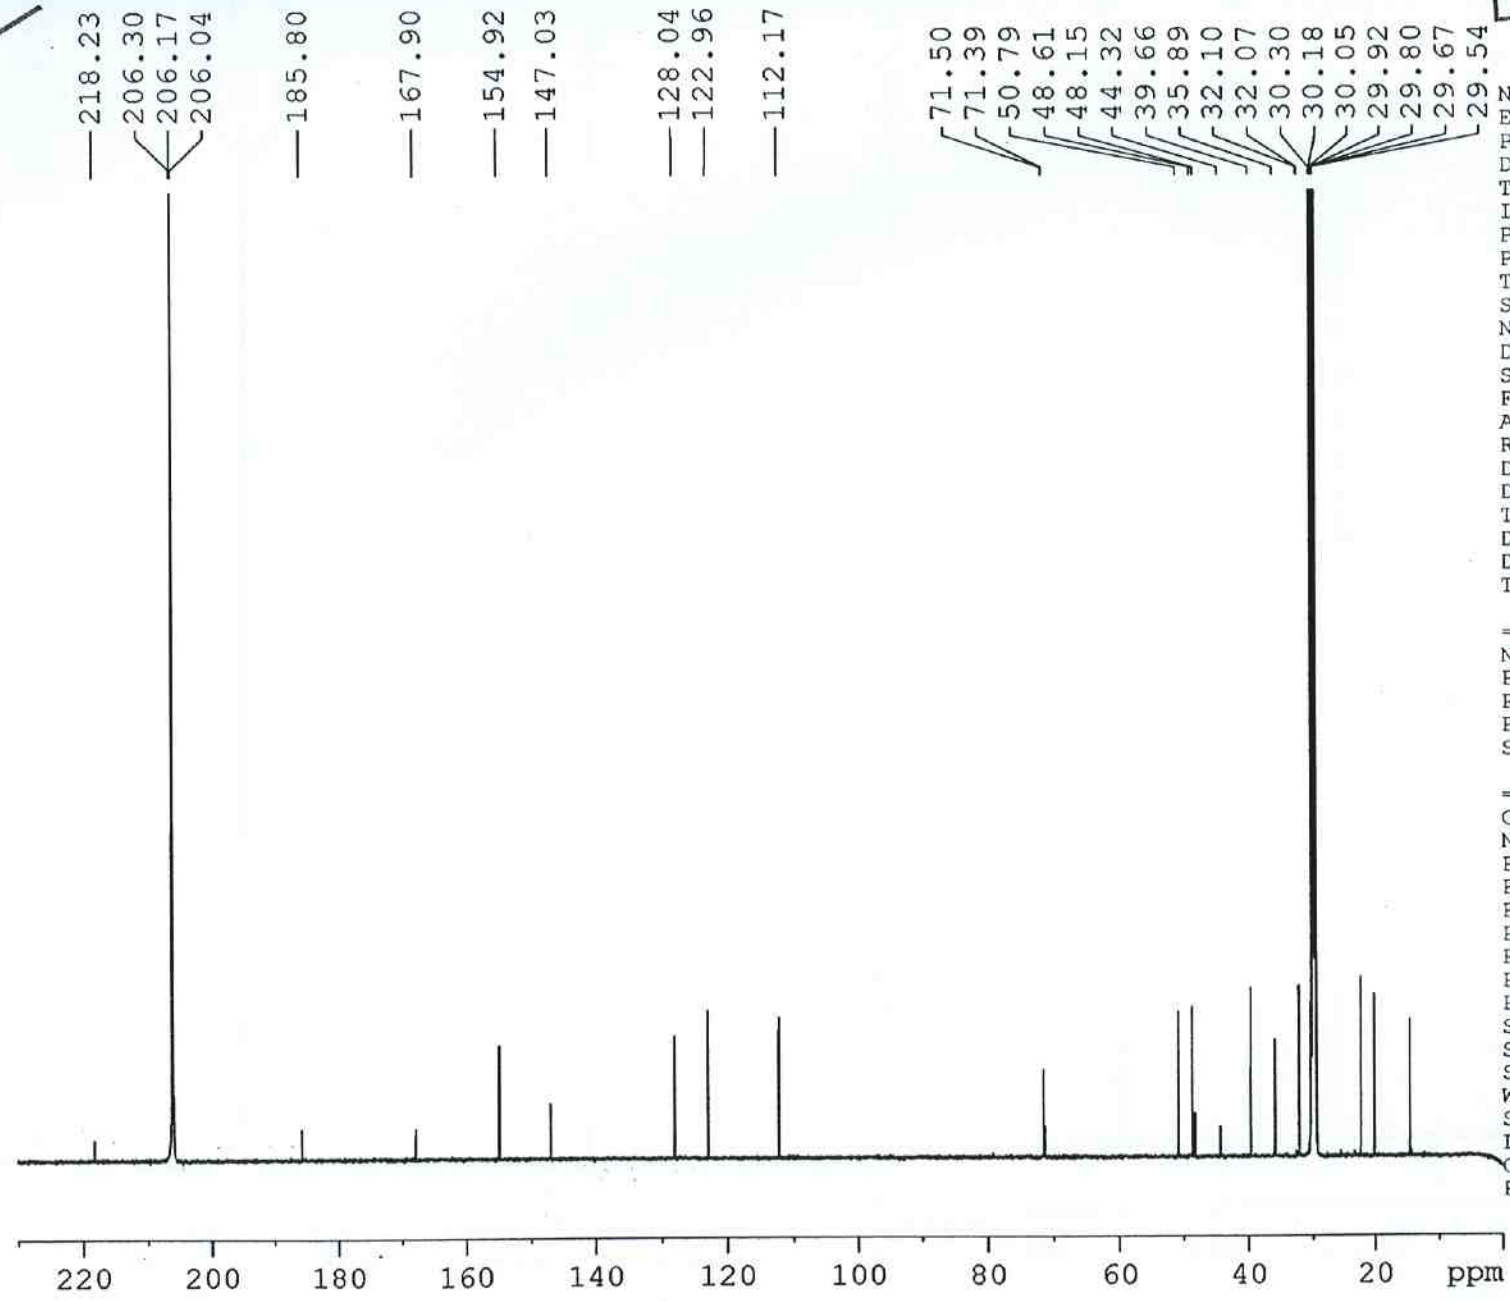

```

NAME          mar10-12
EXPNO         9
PROCNO        1
Date_         20120311
Time_         2.50
INSTRUM       spect
PROBHD        5 mm CPTCI 1H-
PULPROG       zgpg
TD            65536
SOLVENT       Acetone
NS            12288
DS            2
SWH           35971.223 Hz
FIDRES        0.548877 Hz
AQ            0.9110143 sec
RG            32768
DW            13.900 usec
DE            6.50 usec
TE            294.2 K
D1            1.50000000 sec
D11           0.03000000 sec
TD0           12

===== CHANNEL f1 =====
NUC1          13C
P1            16.00 usec
PL1           2.00 dB
PL1W          66.40702820 W
SFO1          150.9453107 MHz

===== CHANNEL f2 =====
CPDPRG2       waltz16
NUC2          1H
PCPD2         65.00 usec
PL2           3.30 dB
PL12          22.06 dB
PL13          27.00 dB
PL2W          9.16420078 W
PL12W         0.12192553 W
PL13W         0.03909260 W
SFO2          600.2336014 MHz
SI            32768
SF            150.9278294 MHz
WDW           EM
SSB           0
LB            1.00 Hz
GB            0
PC            1.40

```

—154.92  
 —128.04  
 —122.97  
 —112.17

<71.50  
 <71.39

50.79  
 48.61  
 39.66  
 35.89  
 32.10  
 32.07  
 30.30  
 30.17  
 29.92  
 29.79  
 22.27  
 20.11

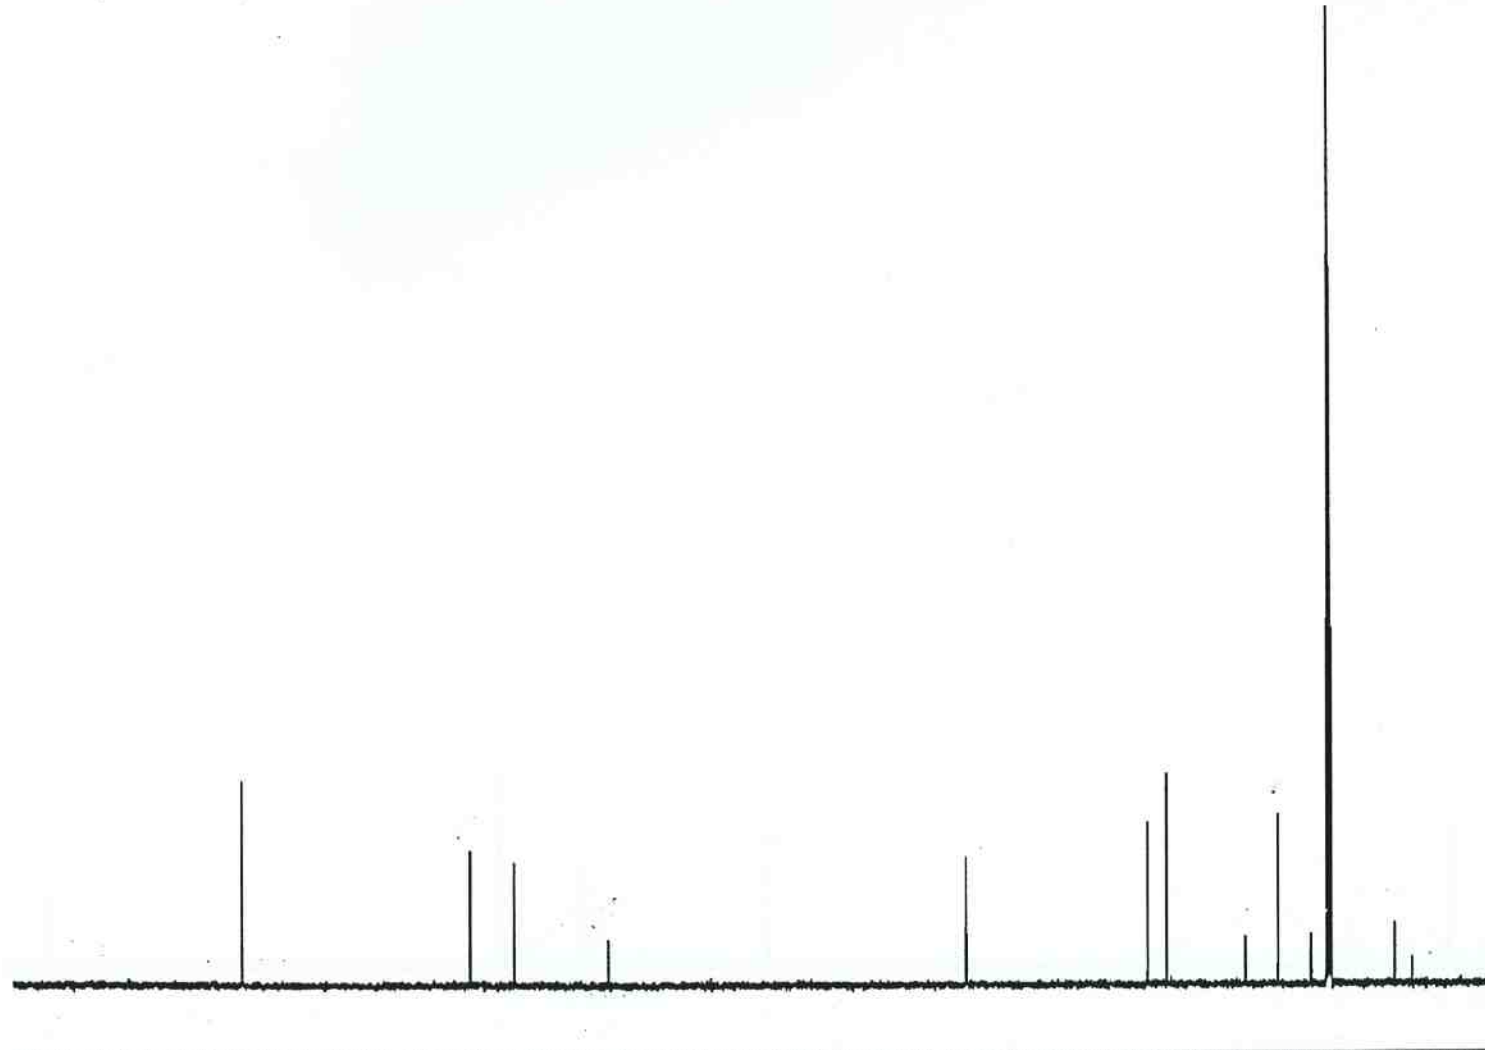

NAME mar10-12  
 EXPNO 11  
 PROCNO 1  
 Date\_ 20120311  
 Time\_ 15.49  
 INSTRUM spect  
 PROBHD 5 mm CPTCI 1H-  
 PULPROG deptsp90  
 TD 65536  
 SOLVENT Acetone  
 NS 4096  
 DS 2  
 SWH 30303.031 Hz  
 FIDRES 0.462388 Hz  
 AQ 1.0814105 sec  
 RG 32768  
 DW 16.500 usec  
 DE 6.50 usec  
 TE 294.6 K  
 CNST2 145.0000000  
 D1 1.50000000 sec  
 D2 0.00344828 sec  
 D12 0.00002000 sec  
 TD0 4

==== CHANNEL f1 =====  
 NUC1 13C  
 P1 16.00 usec  
 P12 2000.00 usec  
 PLO 120.00 dB  
 PL1 2.00 dB  
 PLOW 0.00000000 W  
 PL1W 66.40702820 W  
 SFO1 150.9430463 MHz  
 SP2 1.99 dB  
 SPNAM2 Crp60comp.4  
 SPOAL2 0.500  
 SPOFFS2 0.00 Hz

==== CHANNEL f2 =====  
 CPDPRG2 waltz16  
 NUC2 1H  
 P3 7.50 usec  
 P4 15.00 usec  
 PCPD2 65.00 usec  
 PL2 3.30 dB  
 PL12 22.06 dB  
 PL2W 9.16420078 W  
 PL12W 0.12192553 W  
 SFO2 600.2324009 MHz  
 SI 32768  
 SF 150.9278294 MHz  
 WDW EM  
 SSB 0  
 LB 1.00 Hz  
 GB 0  
 PC 1.40

170 160 150 140 130 120 110 100 90 80 70 60 50 40 30 ppm



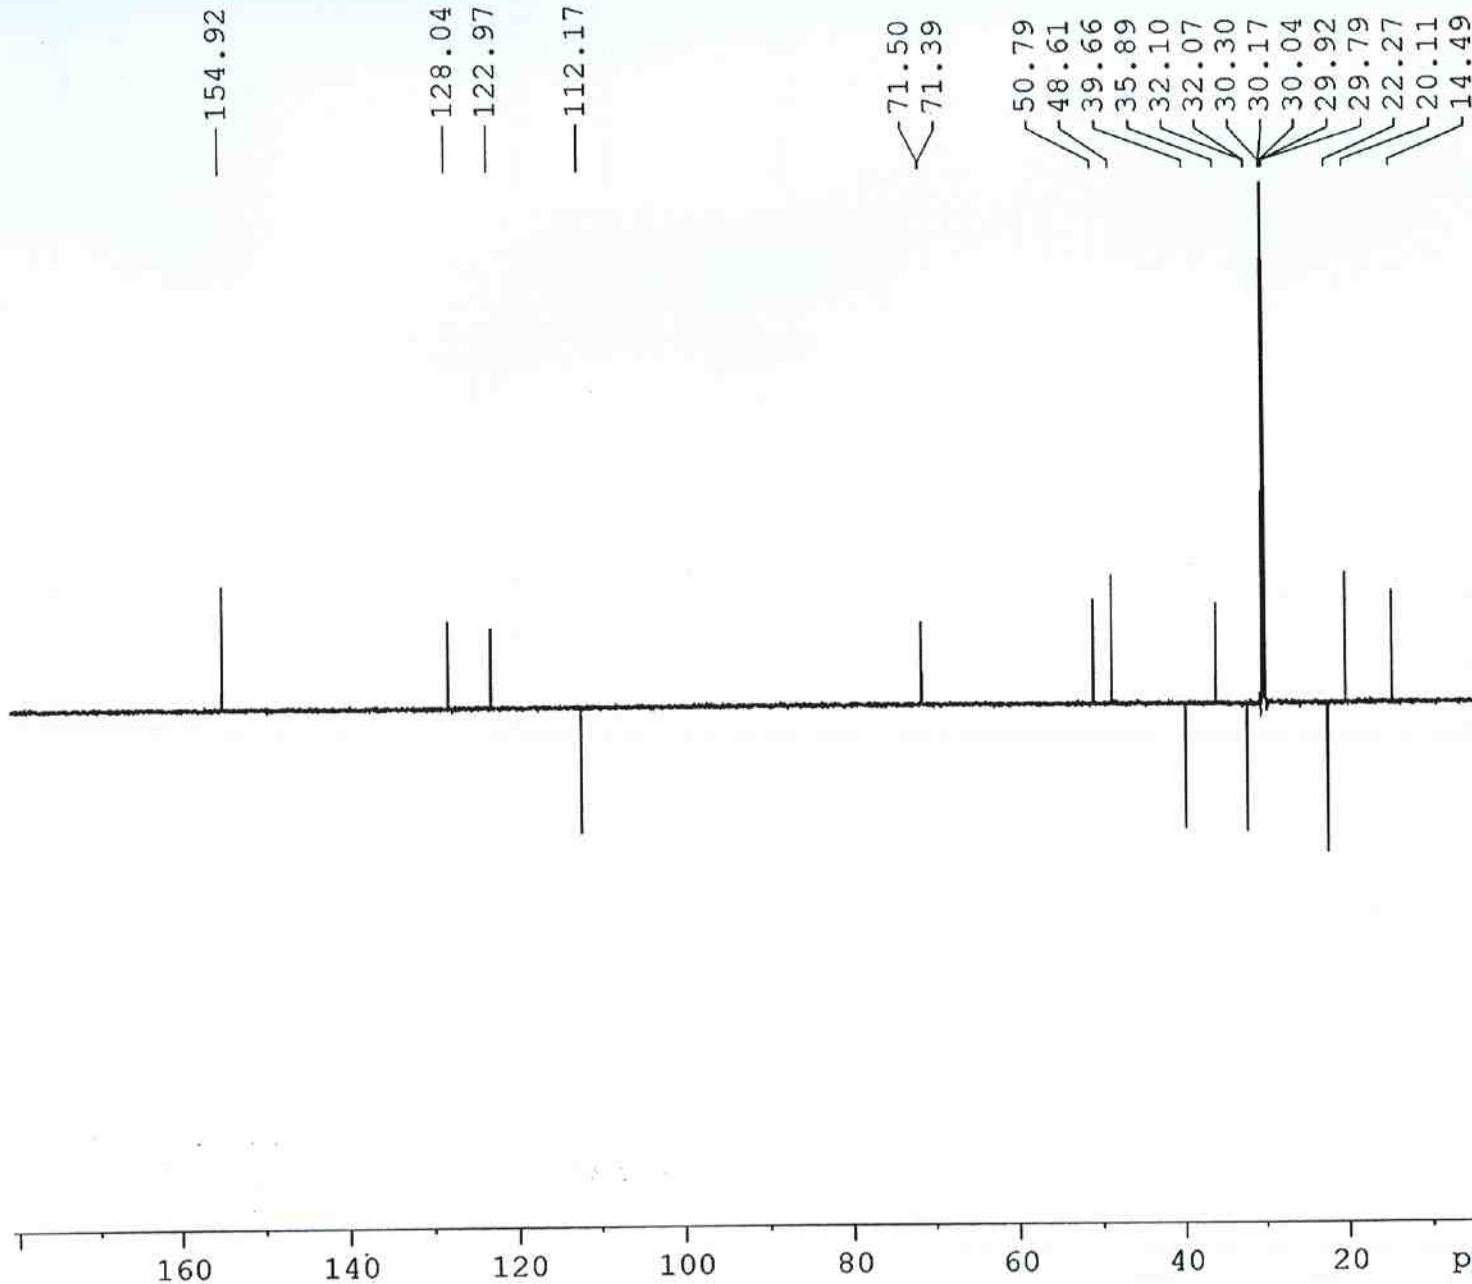

NAME mar10-12  
 EXPNO 10  
 PROCNO 1  
 Date 20120311  
 Time 11.19  
 INSTRUM spect  
 PROBHD 5 mm CPTCI 1H-  
 PULPROG deptspl35  
 TD 65536  
 SOLVENT Acetone  
 NS 6144  
 DS 2  
 SWH 30303.031 Hz  
 FIDRES 0.462388 Hz  
 AQ 1.0814105 sec  
 RG 32768  
 DW 16.500 usec  
 DE 6.50 usec  
 TE 294.4 K  
 CNST2 145.0000000  
 D1 1.50000000 sec  
 D2 0.00344828 sec  
 D12 0.00002000 sec  
 TDO 6

===== CHANNEL f1 =====  
 NUC1 13C  
 P1 16.00 usec  
 P12 2000.00 usec  
 PL0 120.00 dB  
 PL1 2.00 dB  
 PLOW 0.00000000 W  
 PL1W 66.40702820 W  
 SFO1 150.9430463 MHz  
 SP2 1.99 dB  
 SPNAM2 Crp60comp.4  
 SPOAL2 0.500  
 SPOFFS2 0.00 Hz

===== CHANNEL f2 =====  
 CPDPRG2 waltz16  
 NUC2 1H  
 P3 7.50 usec  
 P4 15.00 usec  
 PCPD2 65.00 usec  
 PL2 3.30 dB  
 PL12 22.06 dB  
 PL2W 9.16420078 W  
 PL12W 0.12192553 W  
 SFO2 600.2324009 MHz  
 SI 32768  
 SF 150.9278294 MHz  
 WDW EM  
 SSB 0  
 LB 1.00 Hz  
 GB 0  
 1.40

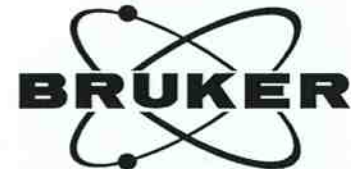

```

NAME          mar10-12
EXPNO         7
PROCNO        1
Date_         20120310
Time          18.02
INSTRUM       spect
PROBHD        5 mm CPTCI 1H-
PULPROG       hsqcetgps1
TD            1024
SOLVENT       Acetone
NS            32
DS            8
SWH           5387.931 Hz
FIDRES        5.261652 Hz
AQ            0.0951700 sec
RG            46341
DW            92.800 usec
DE            6.50 usec
TE            294.2 K
CNST2         145.0000000
D0            0.00000300 sec
D1            1.50000000 sec
D4            0.00172414 sec
D13           0.03000000 sec
D16           0.00000400 sec
D24           0.00015000 sec
DZ4           0.00110000 sec
IN0           0.00001655 sec
ZGQFTNS

----- CHANNEL f1 -----
NUC1          1H
P1            7.40 usec
P2            14.80 usec
P28           0.50 usec
PL1           3.30 dB
PL1W          9.16420078 W
SFO1          600.2326410 MHz

----- CHANNEL f2 -----
CPDPRG2       garp
NUC2          13C
P3            10.00 usec
P4            20.00 usec
PCPD2         60.00 usec
PL2           2.00 dB
PL12          17.56 dB
PL2W          66.40702820 W
PL12W         1.84592509 W
SFO2          150.9430468 MHz

----- GRADIENT CHANNEL -----
GPNAM1        SINE.100
GPNAM2        SINE.100
GPZ1          80.00 %
GPZ2          20.10 %
P16           2000.00 usec
NDO           2
TD            256
SFO1          150.943 MHz
FIDRES        117.924255 Hz
SW            200.000 ppm
FnMODE        Echo-Antiecho
SI            1024
SF            600.2300139 MHz
WFW           QSINE
SSB           2
LB            0.00 Hz
GB            0
PC            4.00
SI            1024
MC2           echo-antiecho
SF            150.9278294 MHz
WFW           QSINE
SSB           2
LB            0.00 Hz
GB            0
    
```

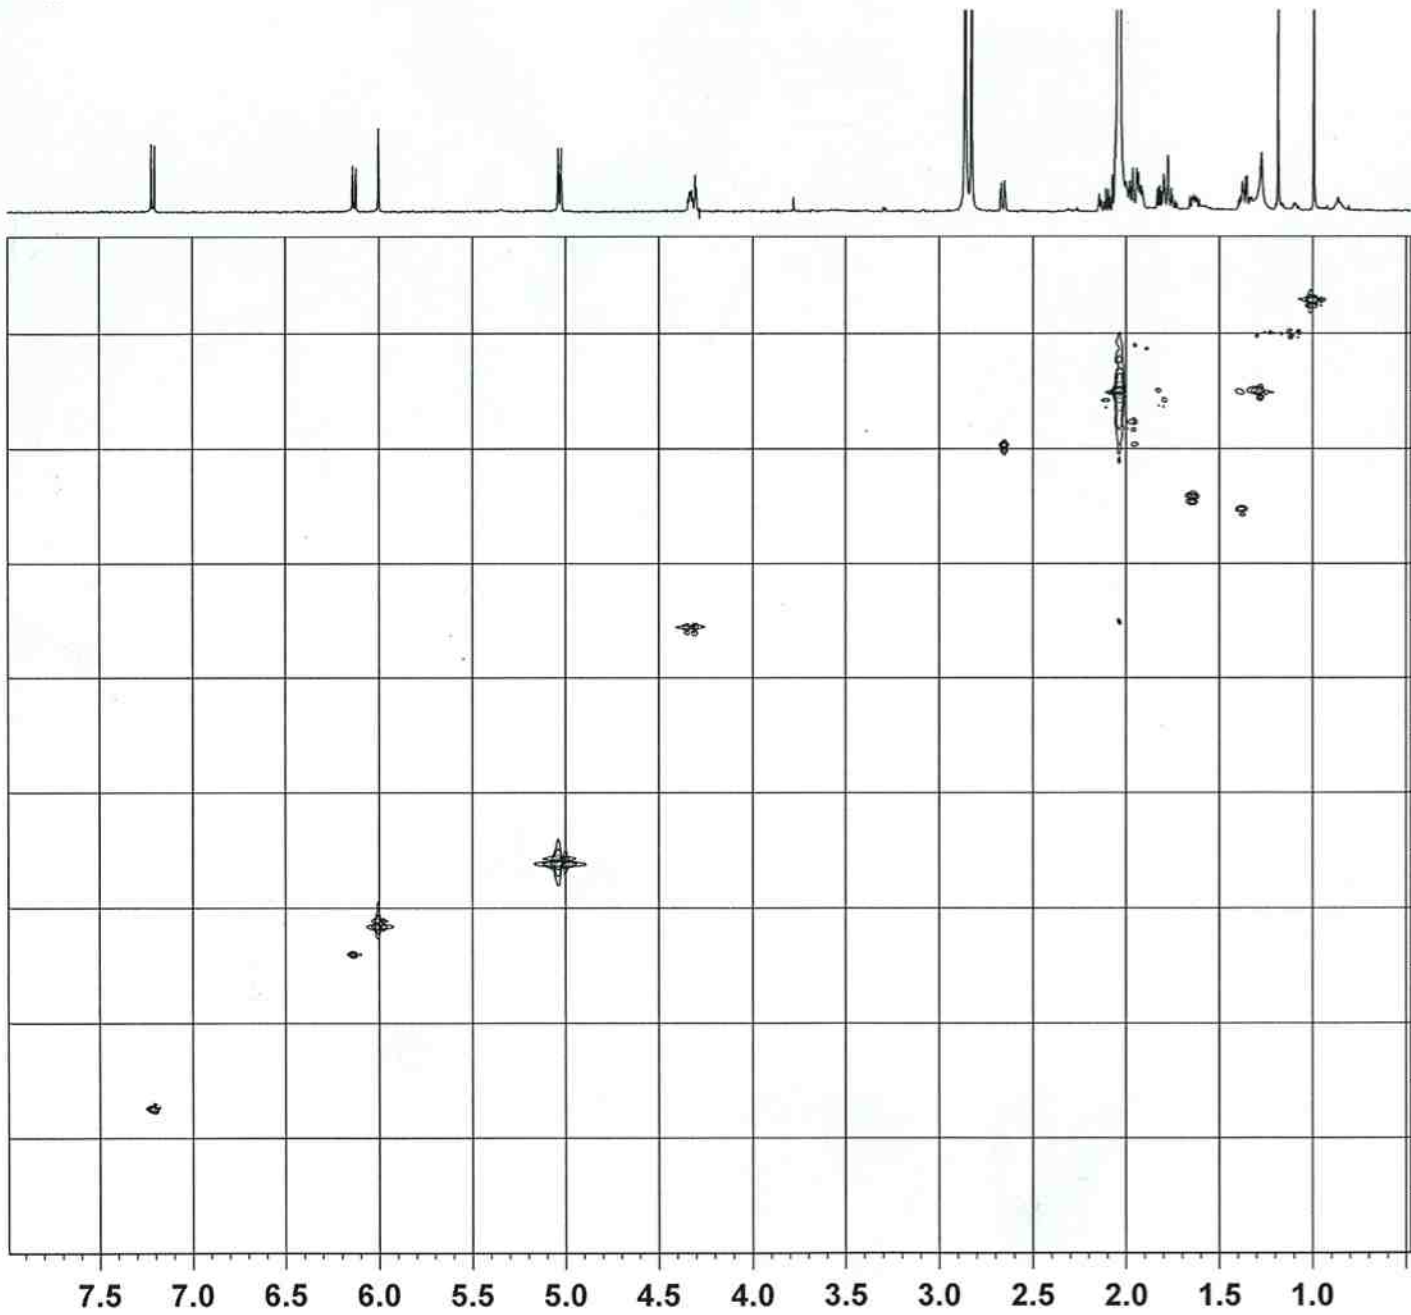

7.5 7.0 6.5 6.0 5.5 5.0 4.5 4.0 3.5 3.0 2.5 2.0 1.5 1.0 ppm



AVANCE  
 3mm CRYOPRO  
 LAB NO: 108

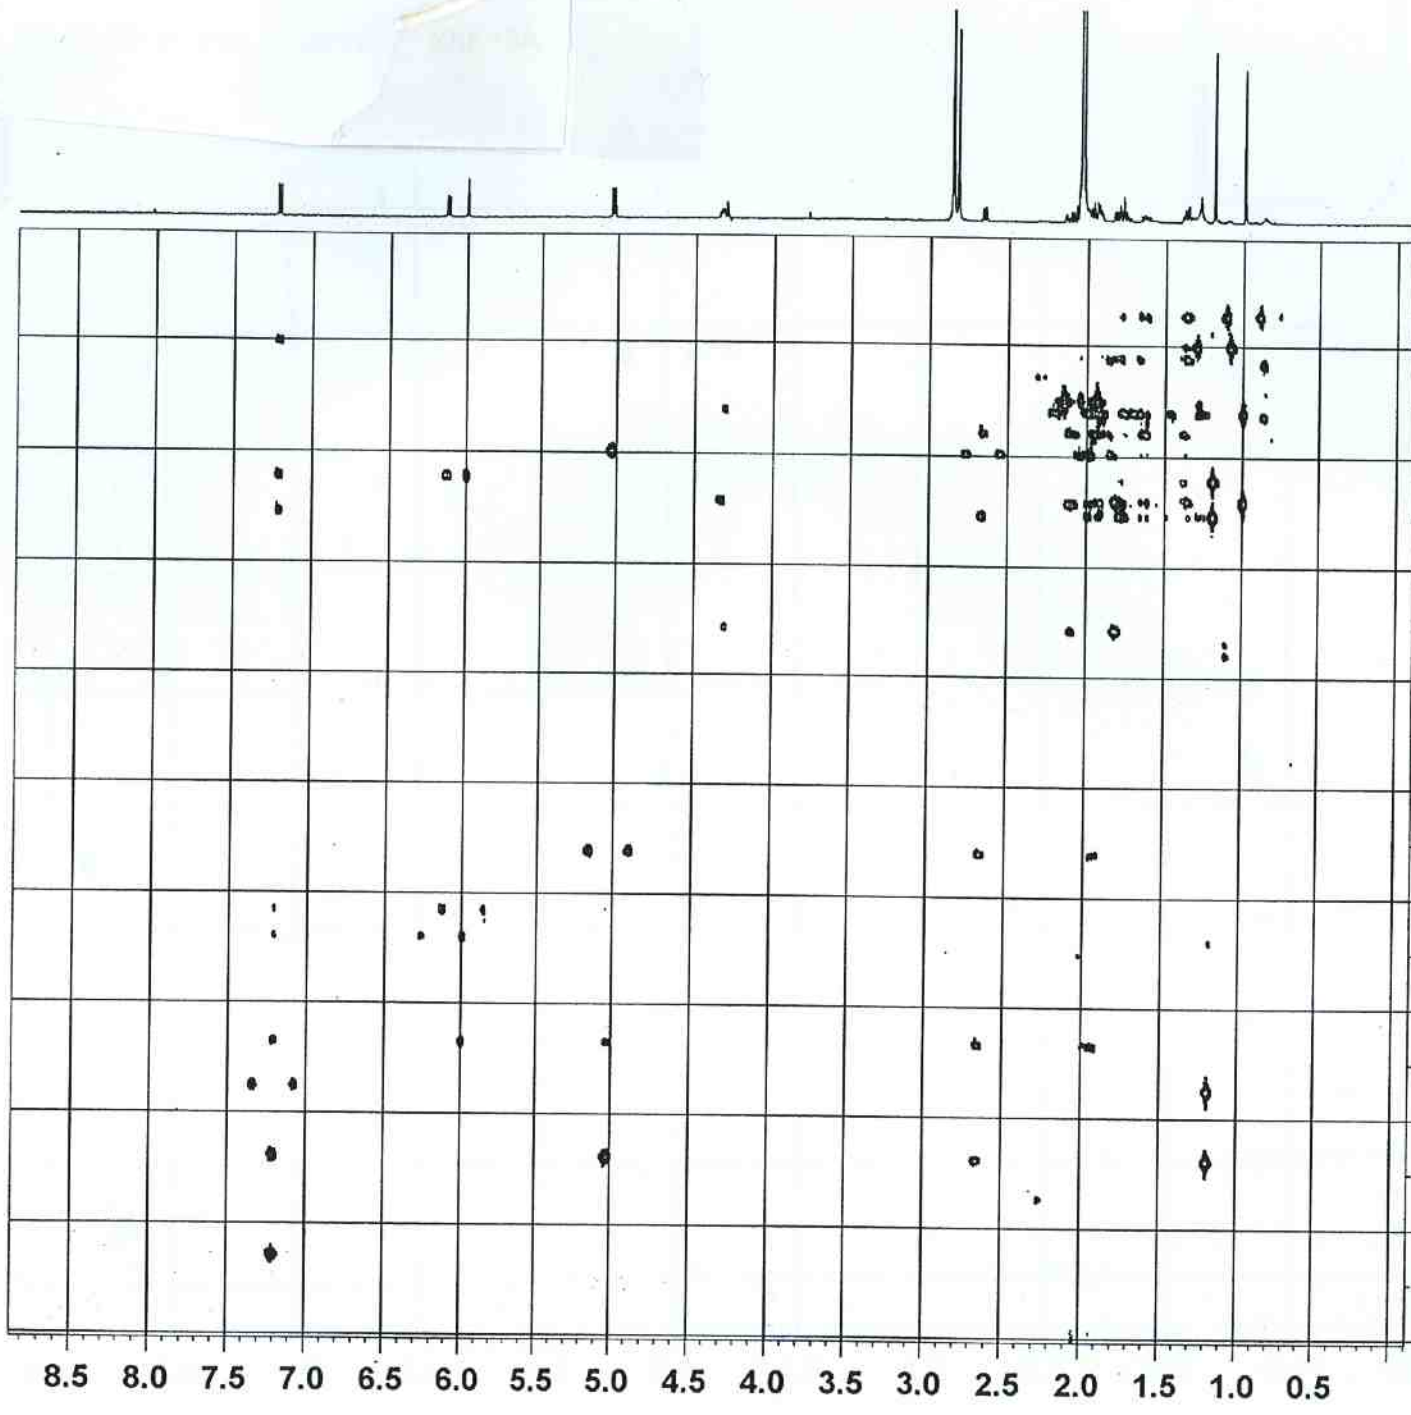

NAME mar10-12  
 EXPNO 8  
 PROCNO 1  
 Date\_ 20120310  
 Time\_ 21.44  
 INSTRUM spect  
 PROBHD 5 mm CPTCI 1H-  
 PULPROG hmbcggplpndqf  
 TD 4096  
 SOLVENT Acetone  
 NS 32  
 DS 8  
 SWH 5387.931 Hz  
 FIDRES 1.315413 Hz  
 AQ 0.3802516 sec  
 RG 36780.8  
 DW 92.800 usec  
 DE 6.50 usec  
 TE 294.3 K  
 CNST2 145.0000000  
 CNST13 13.0000000  
 D0 0.00000300 sec  
 D1 1.50000000 sec  
 D2 0.00344828 sec  
 D6 0.03846154 sec  
 D16 0.00015000 sec  
 IN0 0.00001440 sec

==== CHANNEL f1 =====  
 NUC1 1H  
 P1 7.40 usec  
 P2 14.80 usec  
 PL1 3.30 dB  
 PL1W 9.16420078 W  
 SFO1 600.2326410 MHz

==== CHANNEL f2 =====  
 NUC2 13C  
 P3 10.00 usec  
 PL2 2.00 dB  
 PL2W 66.40702820 W  
 SFO2 150.9453107 MHz

==== GRADIENT CHANNEL =====  
 GPNAM1 SINE.100  
 GPNAM2 SINE.100  
 GPNAM3 SINE.100  
 GPZ1 50.00 %  
 GPZ2 30.00 %  
 GPZ3 40.10 %  
 P16 2000.00 usec  
 NDO 2  
 TD 256  
 SFO1 150.9453 MHz  
 FIDRES 135.614929 Hz  
 SW 230.000 ppm  
 FMODE QF  
 SI 1024

**AVANCE AV-600-LC**  
**3mm CRYOPROBE**  
**LAB NO: 108**

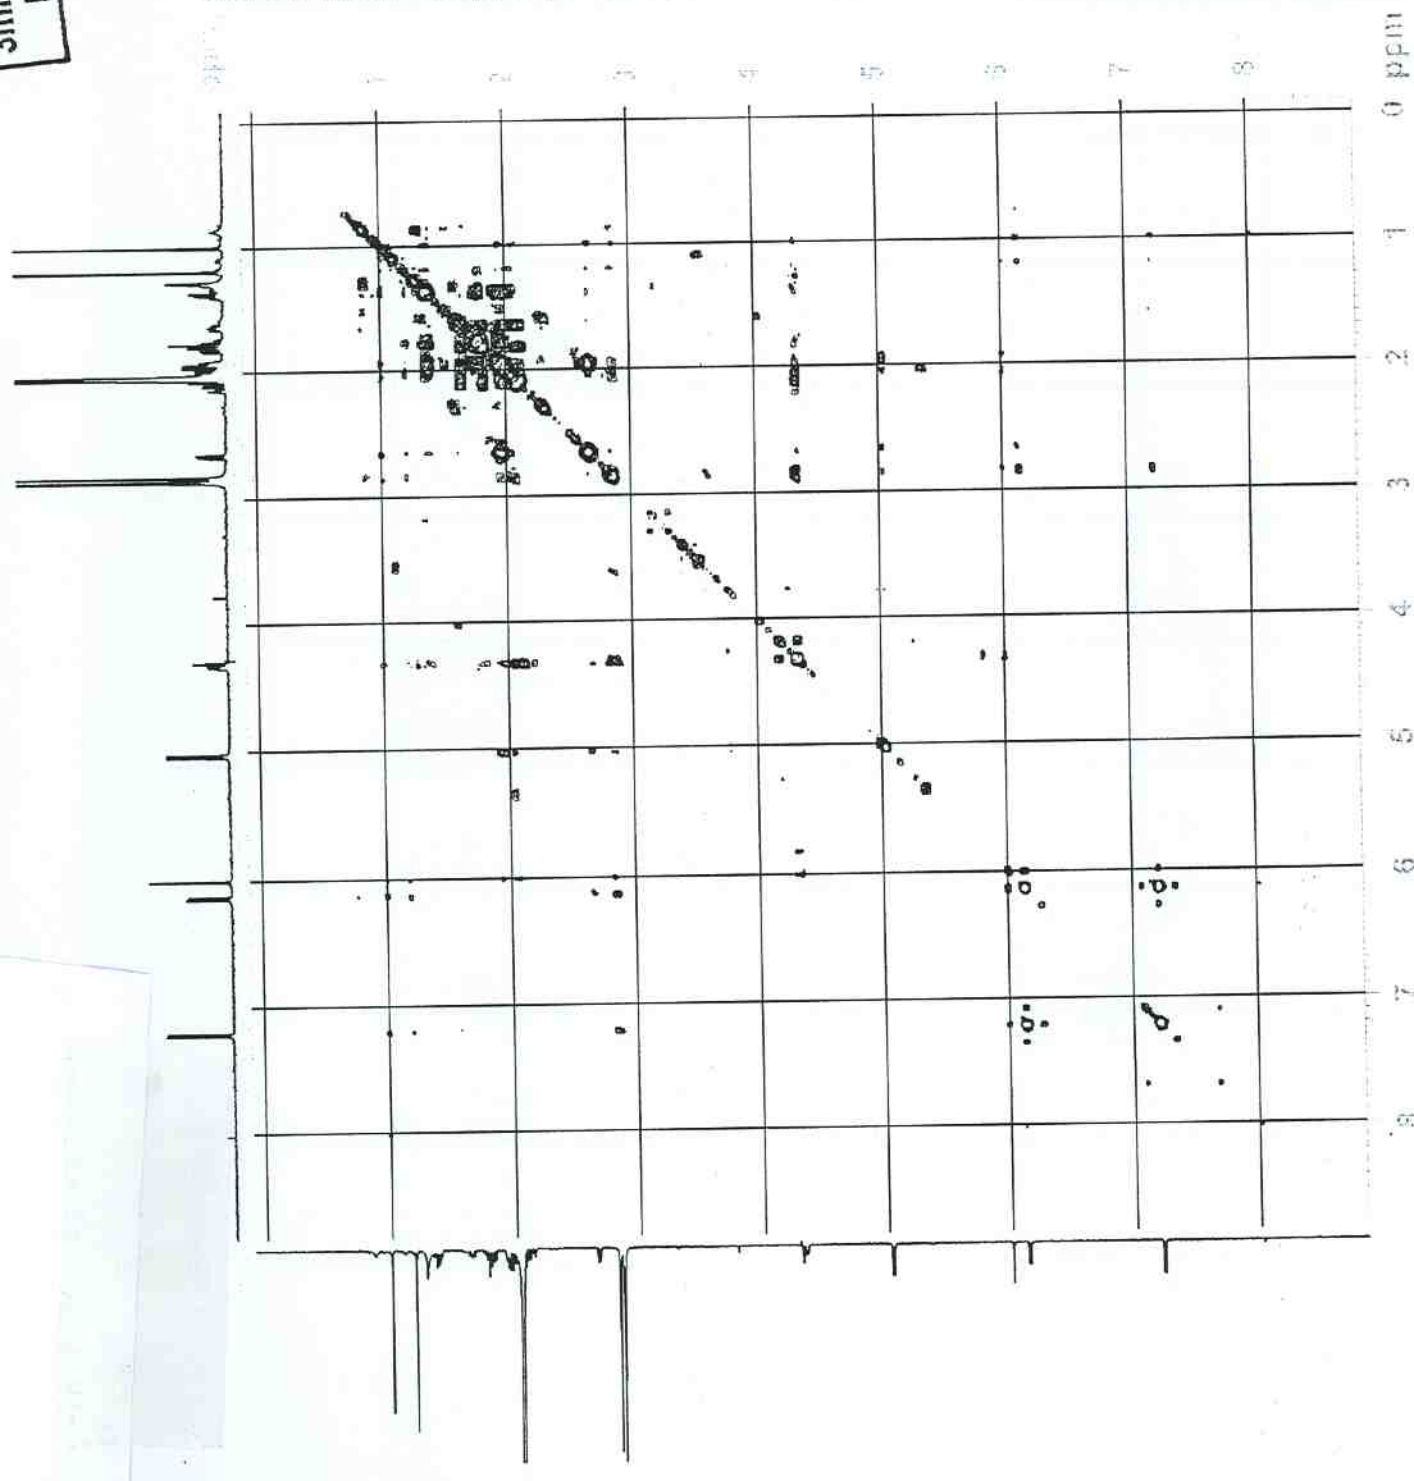

NAME mari0-12  
 EXPNO 2  
 PROCNO 1  
 Date\_ 20120310  
 Time 12.31  
 INSTRUM spect  
 PROBD 5 mm CPTCI 1H-  
 PULPROG cosydfq  
 TD 2048  
 SOLVENT Acetone  
 NS 8  
 DS 4  
 SWH 5387.931 Hz  
 FIDRES 2.630826 Hz  
 AQ 0.1901972 sec  
 RG 128  
 DW 92.800 usec  
 DE 6.50 usec  
 TE 294.4 K  
 D0 0.00000300 sec  
 D1 1.50000000 sec  
 D13 0.00000400 sec  
 D20 0.00000200 sec  
 IN0 0.00018560 sec

==== CHANNEL f1 =====  
 NUC1 1H  
 P1 7.40 usec  
 PL1 3.30 dB  
 PL1W 9.16420078 W  
 SF01 600.2326410 MHz  
 NDO 1  
 TD 256  
 SF01 600.2326 MHz  
 FIDRES 21.046606 Hz  
 SW 8.976 ppm  
 FmMODE QF  
 SI 1024  
 SF 600.2300139 MHz  
 QSIINE QSINE  
 WDW 0  
 SSB 0.00 Hz  
 LB 0  
 GB 1.40  
 PC 1024  
 SI 1024  
 MC2 QF  
 SF 600.2300139 MHz  
 QSIINE QSINE  
 SSB 0  
 LB 0.00 Hz  
 GB 0

**AVANCE AV-600-LC**  
**3mm CRYOPROBE**  
**LAB NO: 108**

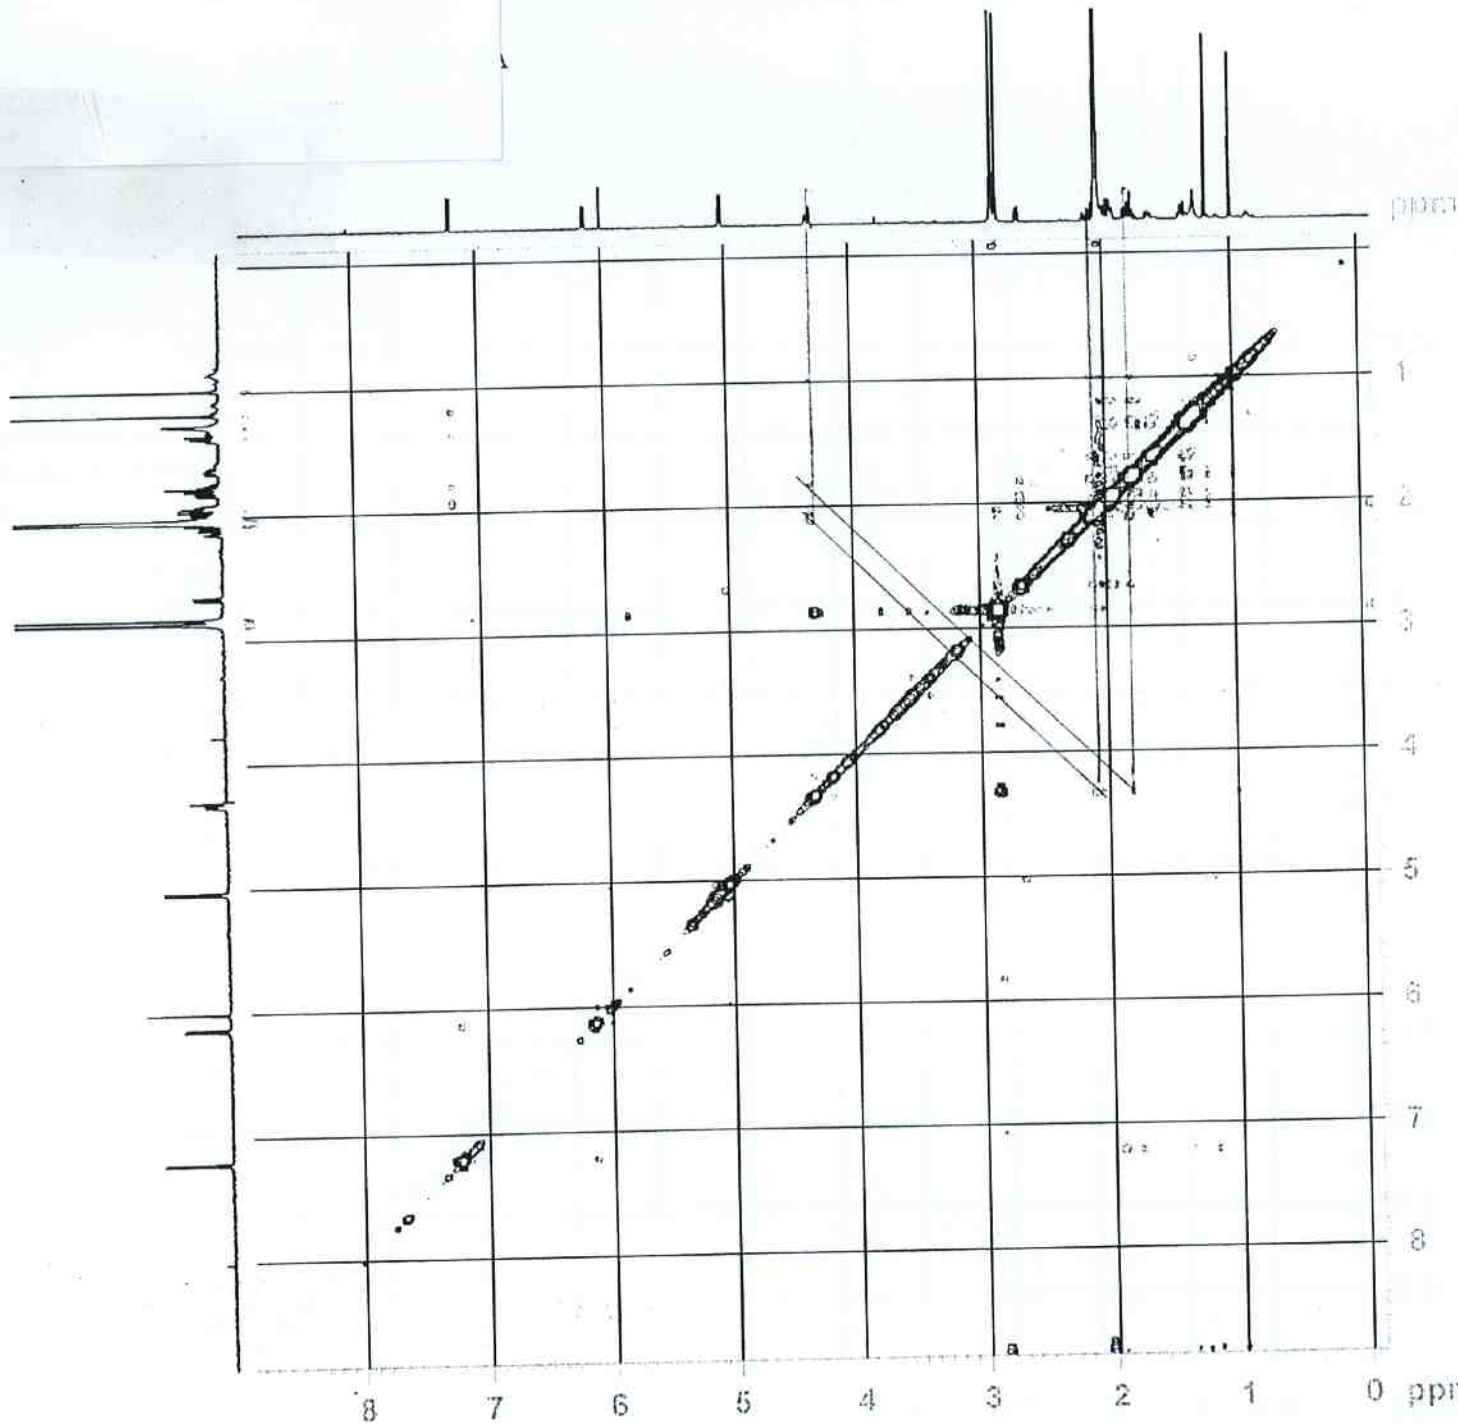

NAME mar10-12  
 EXPNO 3  
 PROCNO 1  
 Date 20120310  
 Time 13.30  
 INSTRUM spect  
 PROBHD 5 mm CPTCI 1H-  
 PULPROG noesygpph  
 TD 1024  
 SOLVENT Acetone  
 NS 8  
 DS 4  
 SWH 5387.931 Hz  
 FIDRES 5.261652 Hz  
 AQ 0.0951700 sec  
 RG 181  
 DW 92.800 usec  
 DE 6.50 usec  
 TE 294.3 K  
 D0 0.00008338 sec  
 D1 1.50000000 sec  
 D8 0.80000001 sec  
 D16 0.00015000 sec  
 INO 0.00018560 sec

===== CHANNEL f1 =====  
 NUC1 1H  
 P1 7.40 usec  
 P2 14.80 usec  
 PL1 3.30 dB  
 PL1W 9.16420078 W  
 SFO1 600.2326410 MHz

===== GRADIENT CHANNEL =====  
 GPNAM1 SINE.100  
 GPNAM2 SINE.100  
 GPZ1 40.00 %  
 GPZ2 -40.00 %  
 P16 2000.00 usec  
 NDO 1  
 TD 256  
 SFO1 600.2326 MHz  
 FIDRES 21.046606 Hz  
 SW 8.976 ppm  
 FnMODE States-TPPI  
 SI 1024  
 SF 600.2300139 MHz  
 WDW QSINE  
 SSB 2  
 LB 0.00 Hz  
 GB 0  
 PC 1.40  
 SI 1024  
 MC2 States-TPPI  
 SF 600.2300139 MHz  
 WDW QSINE  
 SSB 2  
 LB 0.00 Hz  
 GB 0
