# Supplementary material for: Microbial transformation of anti-cancer steroid exemestane and cytotoxicity of its metabolites against cancer cell lines
Source: PubMed Central journal article supplement (PMC3637571; doi:10.1186/1752-153x-7-57), 2013-03-27
Supplement: 1752-153X-7-57-S2.pdf [file 1752-153X-7-57-S2.pdf]

Scan: 15

Base: m/z 148; 62.7%FS TIC: 18696040

R.T.: 1.25

#Ions: 316

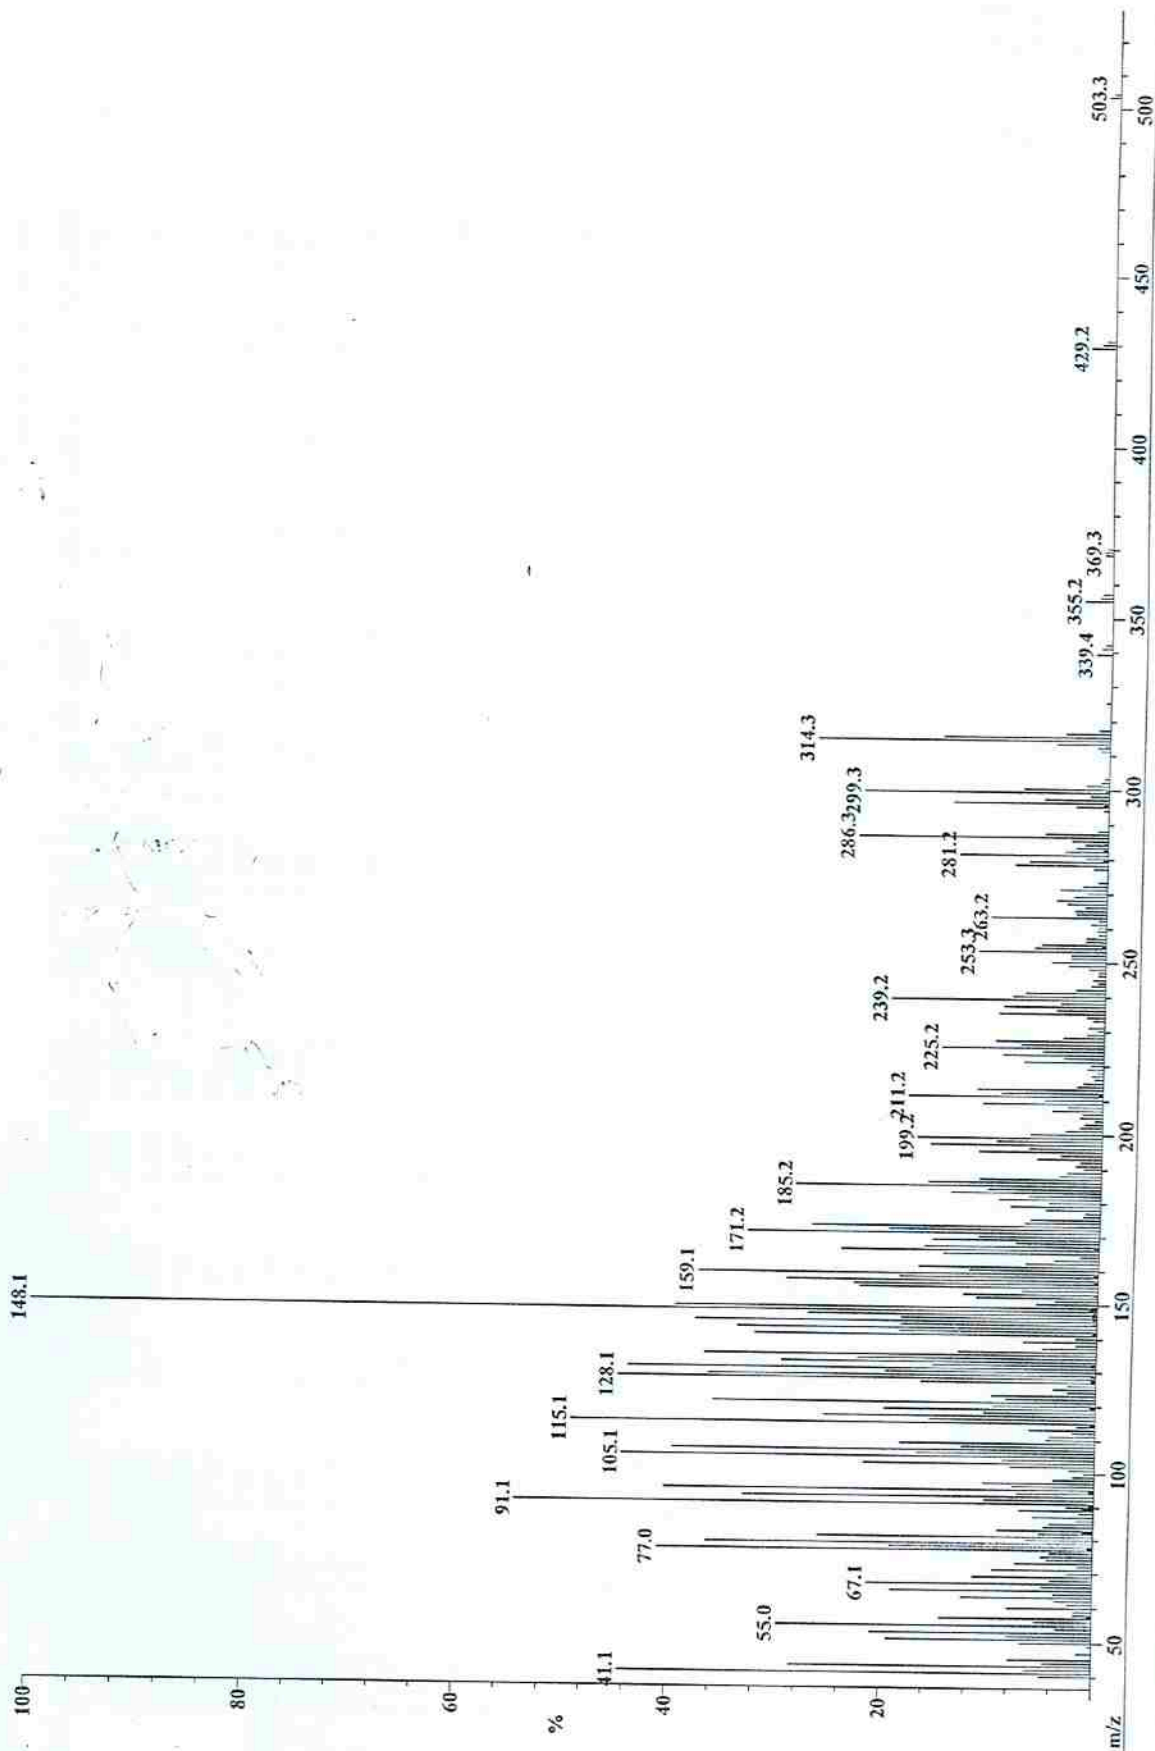

# Scan Graph

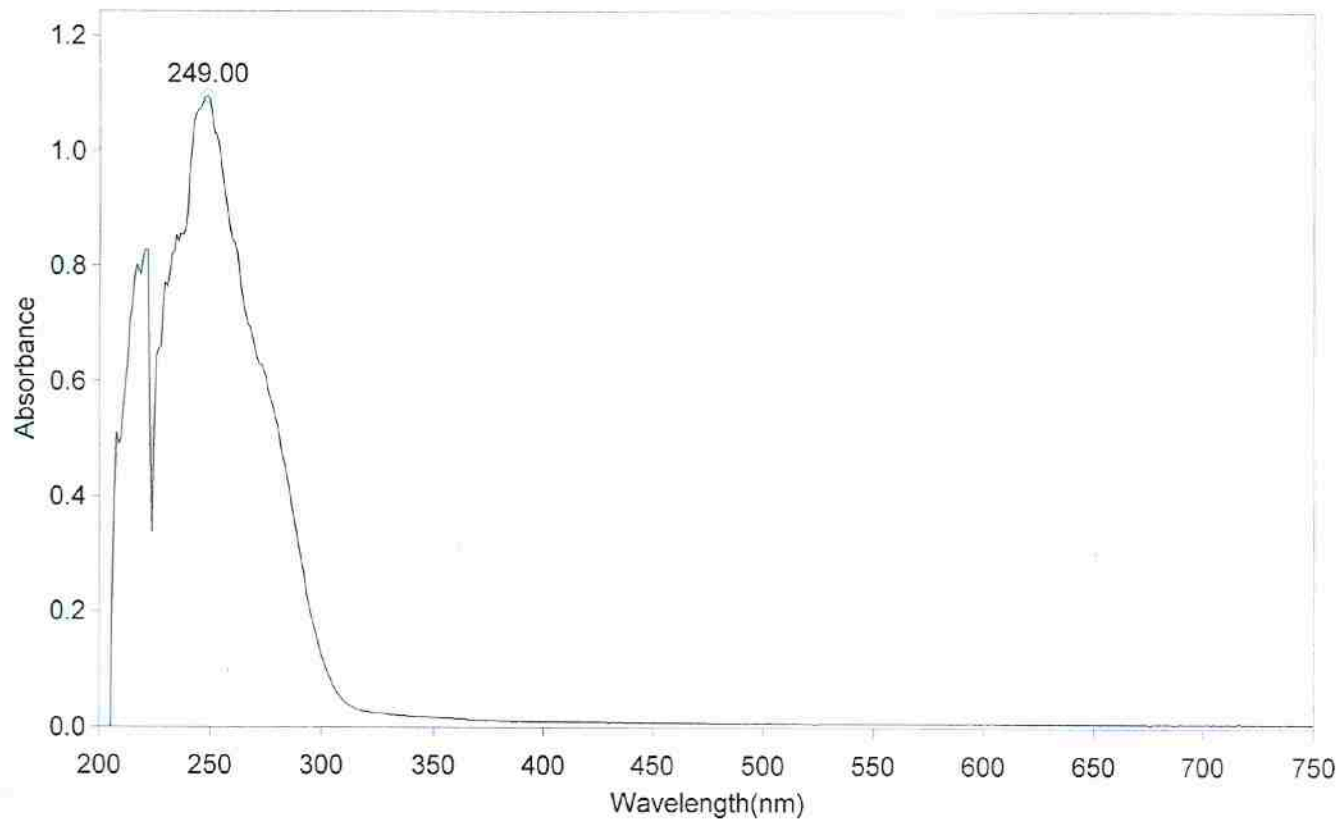

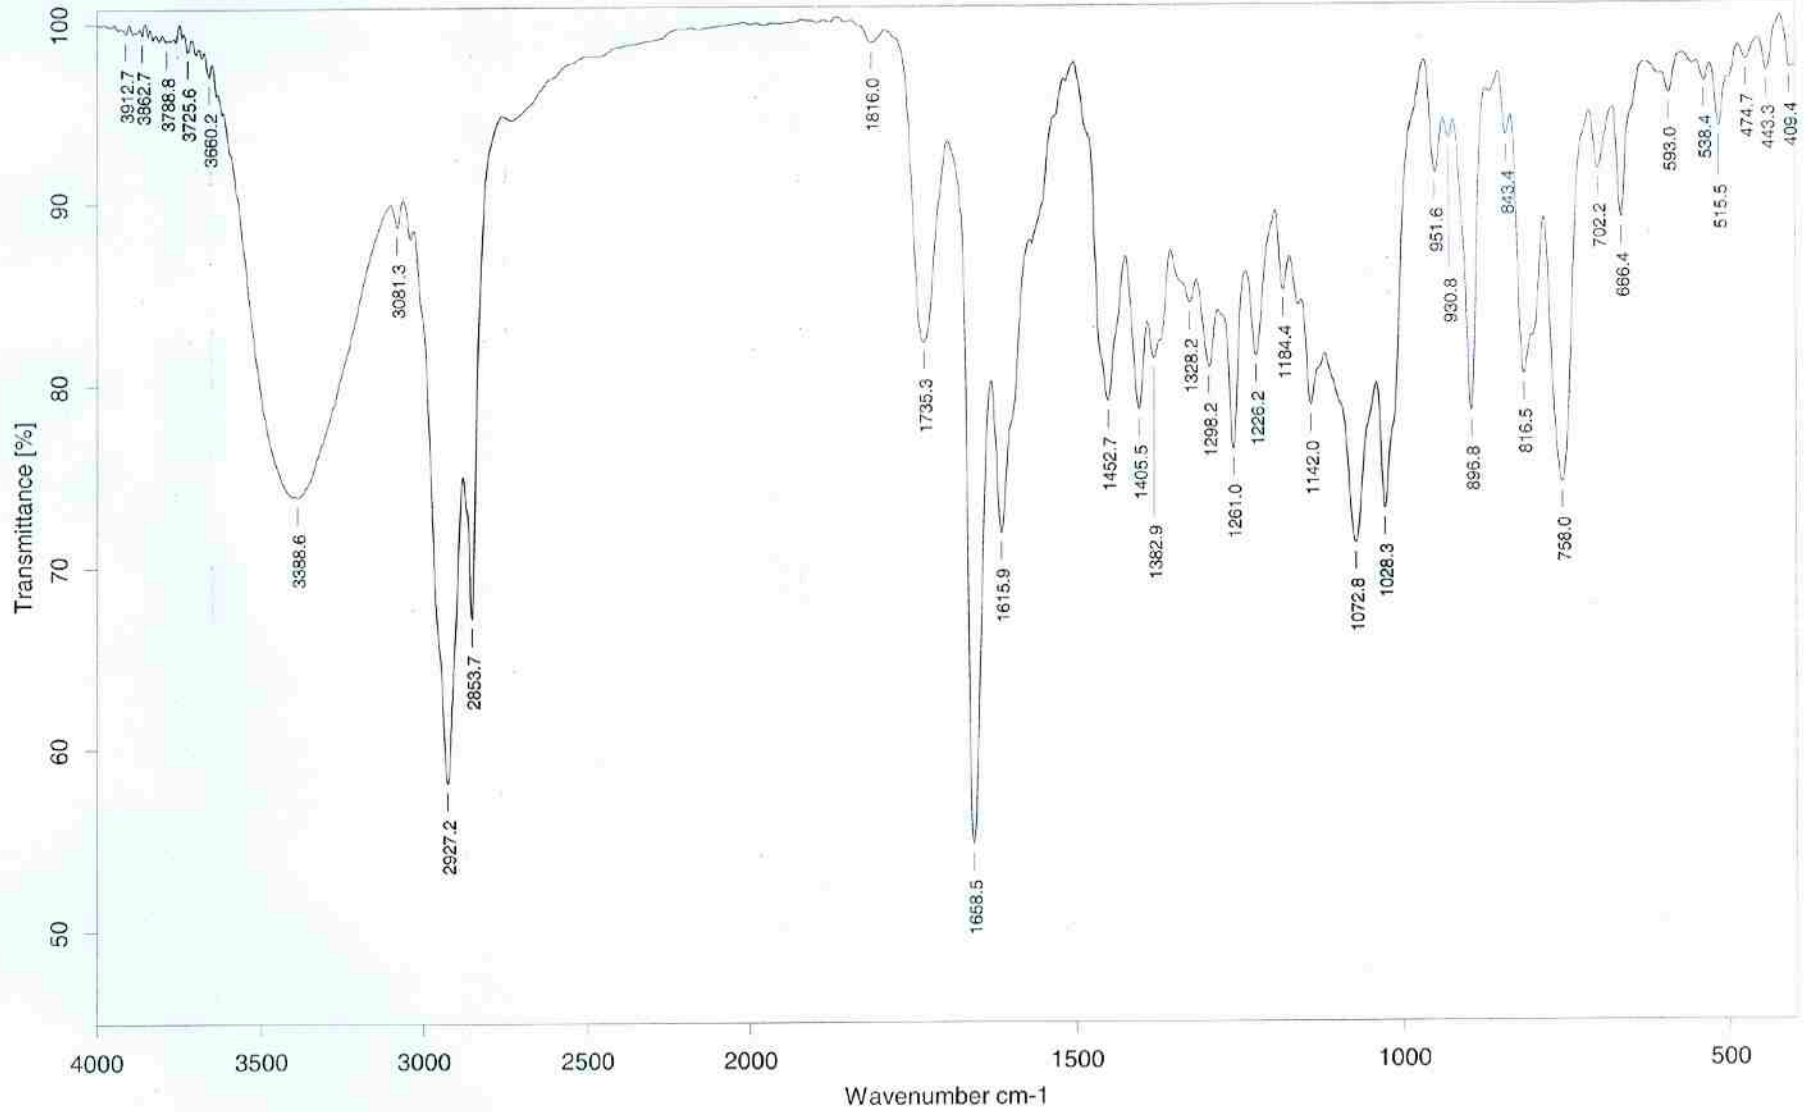

7.331  
7.297  
6.242  
6.236  
6.208  
6.202  
6.098  
6.092  
5.029  
5.023  
5.016  
4.839  
4.099  
4.083  
4.074  
3.305  
3.300  
3.295  
3.290  
2.594  
2.564  
2.198  
2.181  
2.155  
1.925  
1.914  
1.894  
1.872  
1.843  
1.838  
1.816  
1.806  
1.796  
1.782  
1.357  
1.341  
1.313  
1.280  
1.182  
1.153  
0.939  
0.934  
0.911  
0.882

NAME may15  
EXPNO 3  
PROCNO 1  
Date\_ 20120515  
Time\_ 10.51  
INSTRUM spect  
PROBHD 5 mm DUL 13C-1  
PULPROG zg30  
TD 32768  
SOLVENT MeOD  
NS 32  
DS 0  
SWH 6172.839 Hz  
FIDRES 0.188380 Hz  
AQ 2.6542580 sec  
RG 362  
DW 81.000 usec  
DE 6.50 usec  
TE 298.1 K  
D1 1.50000000 sec  
TD0 1

===== CHANNEL f1 =====  
NUC1 1H  
P1 12.80 usec  
PL1 5.00 dB  
SFO1 300.1324010 MHz  
SI 32768  
SF 300.1300076 MHz  
WDW EM  
SSB 0  
LB 0.30 Hz  
GB 0  
PC 1.00

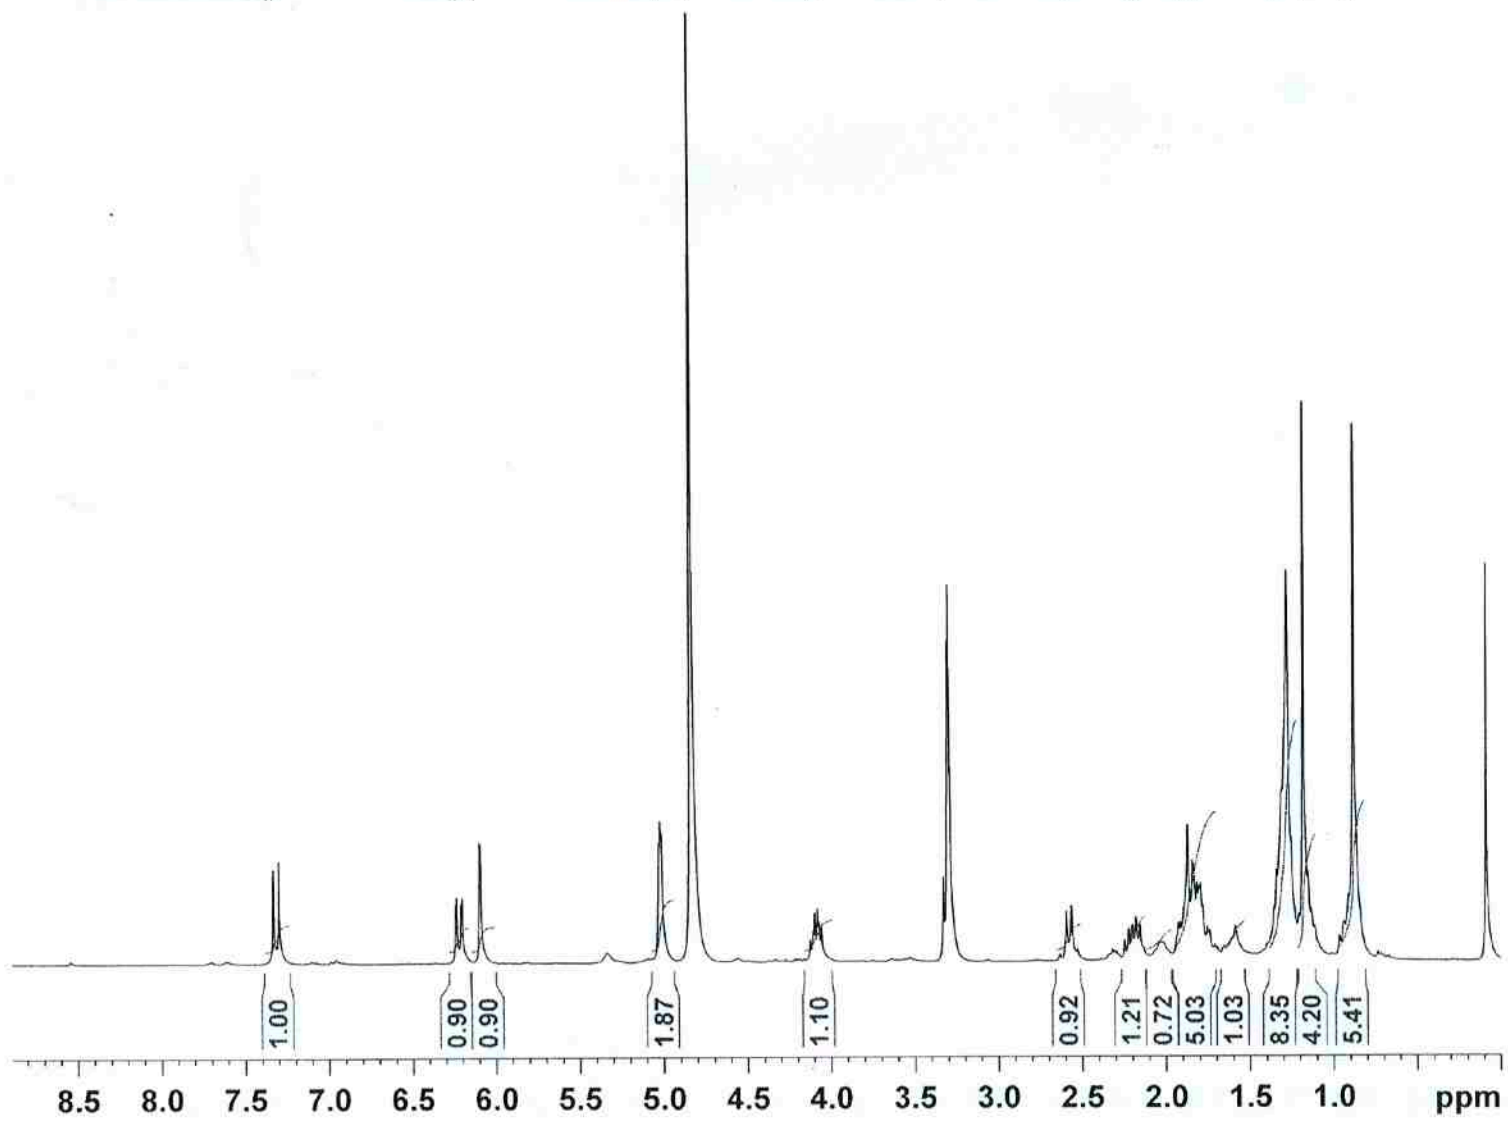

8.5 8.0 7.5 7.0 6.5 6.0 5.5 5.0 4.5 4.0 3.5 3.0 2.5 2.0 1.5 1.0 ppm

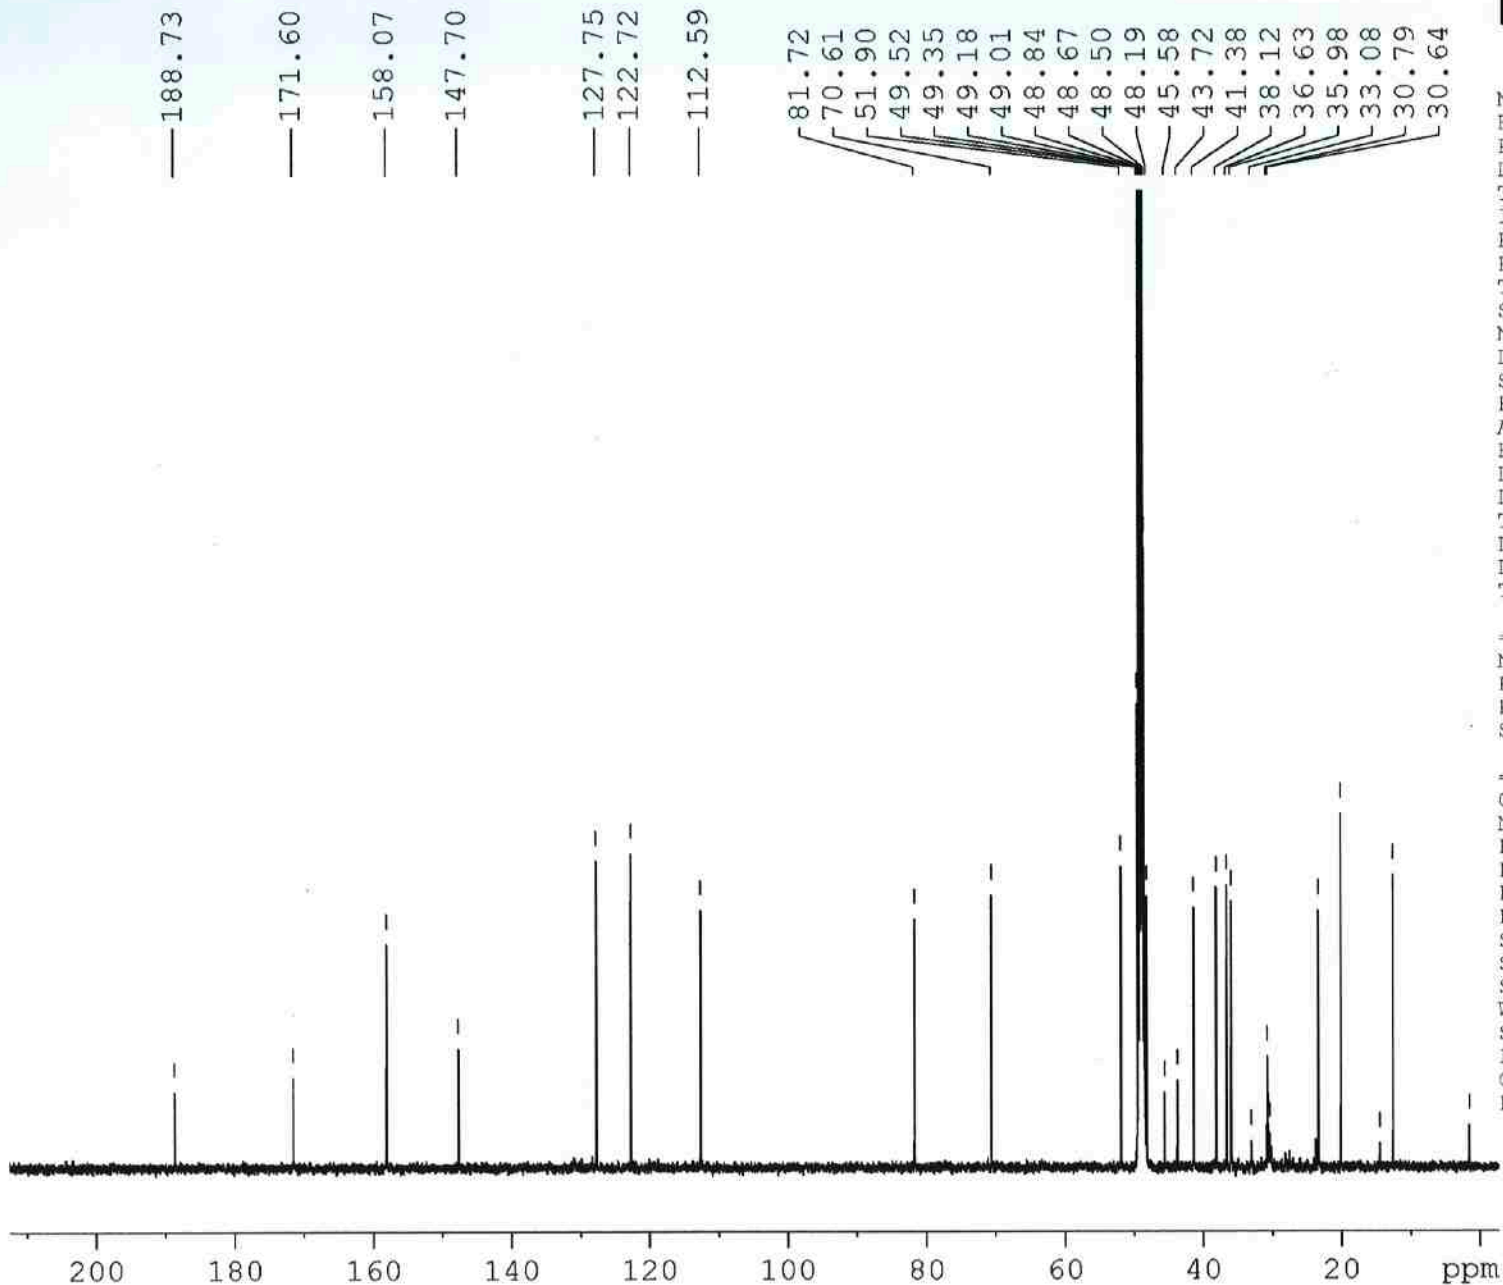

```

NAME          may28-12
EXPNO         2
PROCNO       1
Date_         20120528
Time          15.46
INSTRUM      spect
PROBHD       5 mm PABBI 1H/
PULPROG      zgpg
TD           32768
SOLVENT      MeOD
NS           20480
DS           2
SWH          30303.031 Hz
FIDRES       0.924775 Hz
AQ           0.5407385 sec
RG           32768
DW           16.500 usec
DE           6.50 usec
TE           300.0 K
D1           1.5000000 sec
D11          0.0300000 sec
TDO         20
  
```

```

===== CHANNEL f1 =====
NUC1          13C
P1            15.25 usec
PL1           -3.00 dB
SFO1          125.7975248 MHz
  
```

```

===== CHANNEL f2 =====
CPDPRG2      waltz16
NUC2          1H
PCPD2        80.00 usec
PL2           5.75 dB
PL12         25.50 dB
PL13         120.00 dB
SFO2          500.2330014 MHz
SI           32768
SF           125.7827561 MHz
WDW          EM
SSB           0
LB           1.00 Hz
GB           0
PC           1.40
  
```

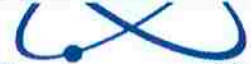

—158.07

—127.76

—122.72

—81.72

—70.61

—51.89

—48.18

—36.63

NAME may28-12  
EXPNO 4  
PROCNO 1  
Date 20120529  
Time 9.43  
INSTRUM spect  
PROBHD 5 mm PABBI 1H/  
PULPROG dept90  
TD 32768  
SOLVENT MeOD  
NS 2398  
DS 0  
SWH 23809.523 Hz  
FIDRES 0.726609 Hz  
AQ 0.6881990 sec  
RG 32768  
DW 21.000 usec  
DE 6.50 usec  
TE 299.7 K  
CNST2 145.000000  
D1 1.5000000 sec  
D2 0.00344828 sec  
D12 0.00002000 sec  
TDO 6

===== CHANNEL f1 =====  
NUC1 13C  
P1 15.25 usec  
P2 30.50 usec  
PL1 -3.00 dB  
SFO1 125.7948834 MHz

===== CHANNEL f2 =====  
CPDPRG2 waltz16  
NUC2 1H  
P3 8.00 usec  
P4 16.00 usec  
PCPD2 80.00 usec  
PL2 5.75 dB  
PL12 25.50 dB  
SFO2 500.2330014 MHz  
SI 32768  
SF 125.7827561 MHz  
WDW EM  
SSB 0  
LB 1.00 Hz  
GB 0  
PC 1.40

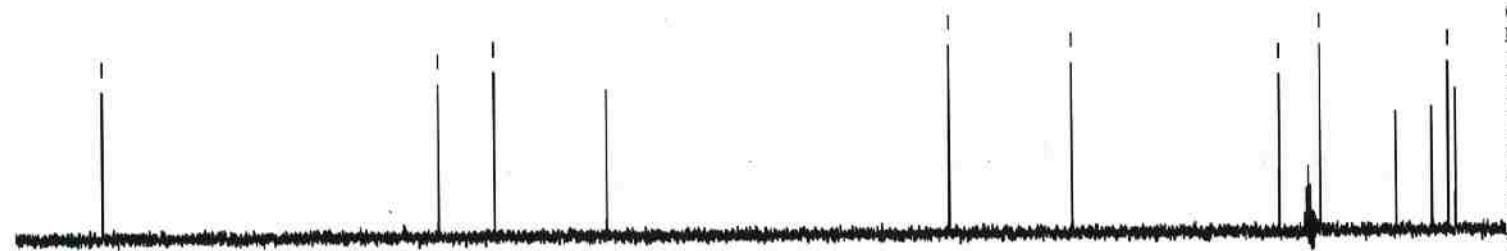

160 150 140 130 120 110 100 90 80 70 60 50 40 ppm

DEPT135

—158.08  
 —127.76  
 —122.72  
 —112.60  
 —81.72  
 —70.61  
 —51.89  
 —48.18  
 —43.72  
 —41.38  
 —38.12  
 —36.62  
 —35.98  
 —23.37  
 —20.10  
 —12.53

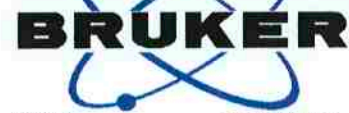

NAME may28-12  
 EXPNO 3  
 PROCNO 1  
 Date\_ 20120529  
 Time\_ 3.46  
 INSTRUM spect  
 PROBHD 5 mm PABBI 1H/  
 PULPROG dept135  
 TD 32768  
 SOLVENT MeOD  
 NS 10240  
 DS 0  
 SWH 23809.523 Hz  
 FIDRES 0.726609 Hz  
 AQ 0.6881990 sec  
 RG 32768  
 DW 21.000 usec  
 DE 6.50 usec  
 TE 298.9 K  
 CNST2 145.000000  
 D1 1.5000000 sec  
 D2 0.00344828 sec  
 D12 0.00002000 sec  
 TD0 10

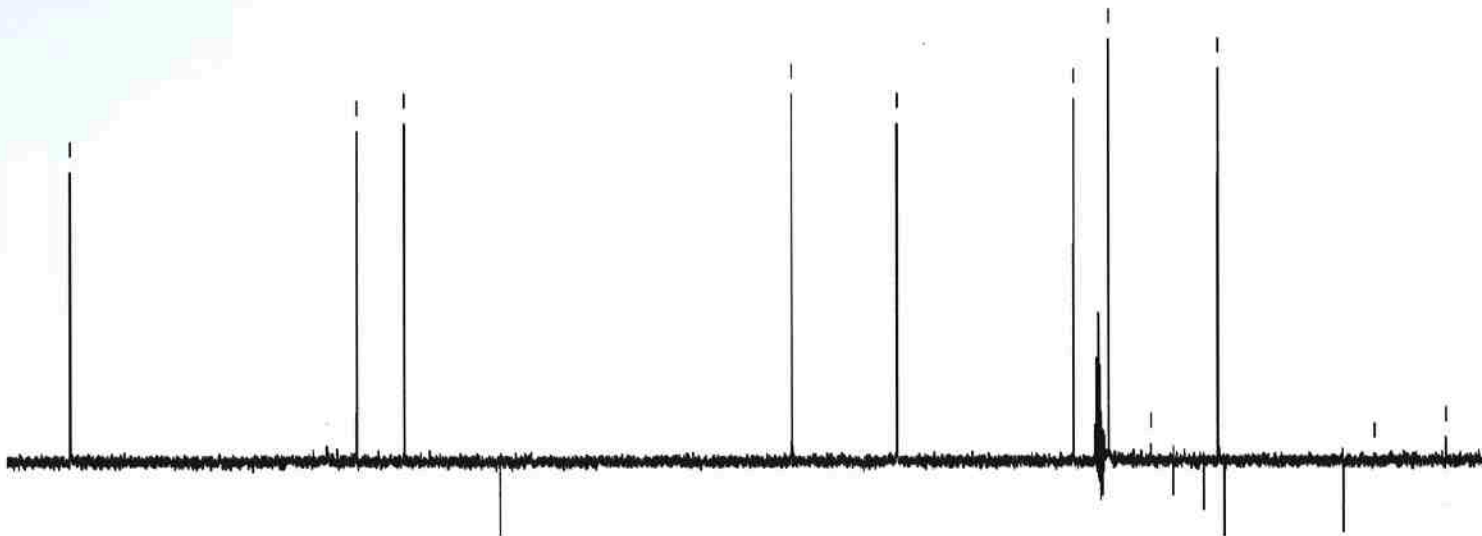

===== CHANNEL f1 =====  
 NUC1 13C  
 P1 15.25 usec  
 P2 30.50 usec  
 PL1 -3.00 dB  
 SFO1 125.7948834 MHz

===== CHANNEL f2 =====  
 CPDPRG2 waltz16  
 NUC2 1H  
 P3 8.00 usec  
 P4 16.00 usec  
 PCPD2 80.00 usec  
 PL2 5.75 dB  
 PL12 25.50 dB  
 SFO2 500.2330014 MHz  
 SI 32768  
 SF 125.7827561 MHz  
 WDW EM  
 SSB 0  
 LB 1.00 Hz  
 GB 0  
 PC 1.20

160 150 140 130 120 110 100 90 80 70 60 50 40 30 20 ppm



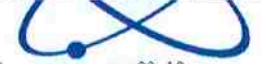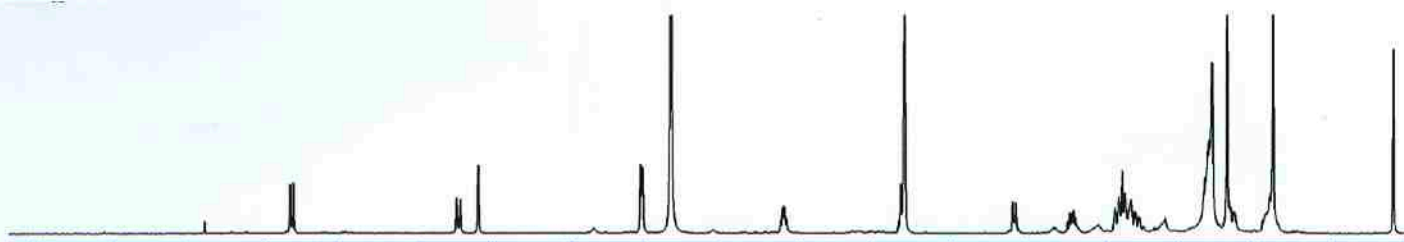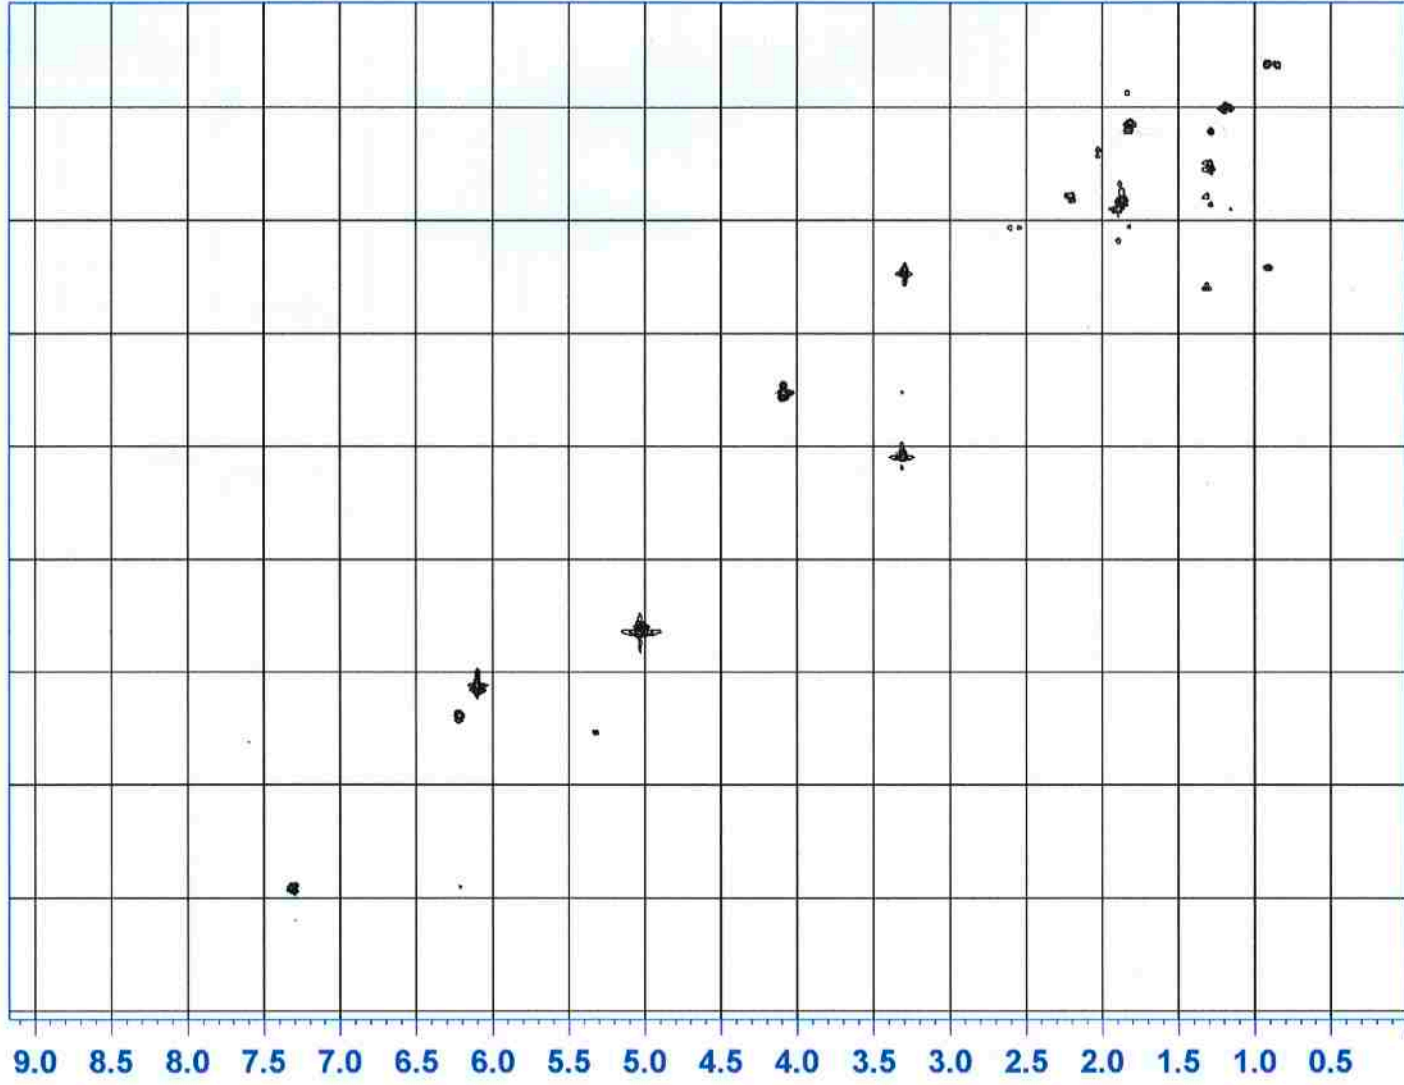

NAME may29-12  
EXPNO 2  
PROCNO 1  
Date\_ 20120529  
Time 11.36  
INSTRUM spect  
PROBHD 5 mm PABBI 1H/  
PULPROG hsqcetgps1  
TD 1024  
SOLVENT MeOD  
NS 32  
DS 8  
SWH 4595.588 Hz  
FIDRES 4.487879 Hz  
AQ 0.1115700 sec  
RG 20642.5  
DW 108.800 usec  
DE 6.50 usec  
TE 300.0 K  
CNST2 145.0000000  
D0 0.00000300 sec  
D1 1.50000000 sec  
D4 0.00172414 sec  
D11 0.03000000 sec  
D13 0.00000400 sec  
D16 0.00020000 sec  
D24 0.00110000 sec  
IN0 0.00002210 sec  
ZGPTNS

----- CHANNEL f1 -----  
NUC1 1H  
P1 7.05 usec  
P2 14.10 usec  
P28 1000.00 usec  
PL1 5.00 dB  
SFO1 500.2323011 MHz

----- CHANNEL f2 -----  
CPDPRG2 garp  
NUC2 13C  
P3 15.25 usec  
P4 30.50 usec  
PCPD2 70.00 usec  
PL2 -3.00 dB  
PL12 9.00 dB  
SFO2 125.7942545 MHz

----- GRADIENT CHANNEL -----  
GPNAM1 SINE.100  
GPNAM2 SINE.100  
GPZ1 80.00 V  
GPZ2 20.10 V  
PI6 1000.00 usec  
NDO 2  
TD 256  
SFO1 125.7943 MHz  
FIDRES 88.449081 Hz  
SW 180.000 ppm  
FnMODE Echo-Antiecho  
SI 1024  
SF 500.2300121 MHz  
WDW QSINE  
SSB 2  
LB 0.00 Hz  
GB 0  
PC 1.00  
SI 1024  
MC2 echo-antiecho  
SF 125.7827561 MHz  
WDW QSINE  
SSB 2  
LB 0.00 Hz  
GB 0



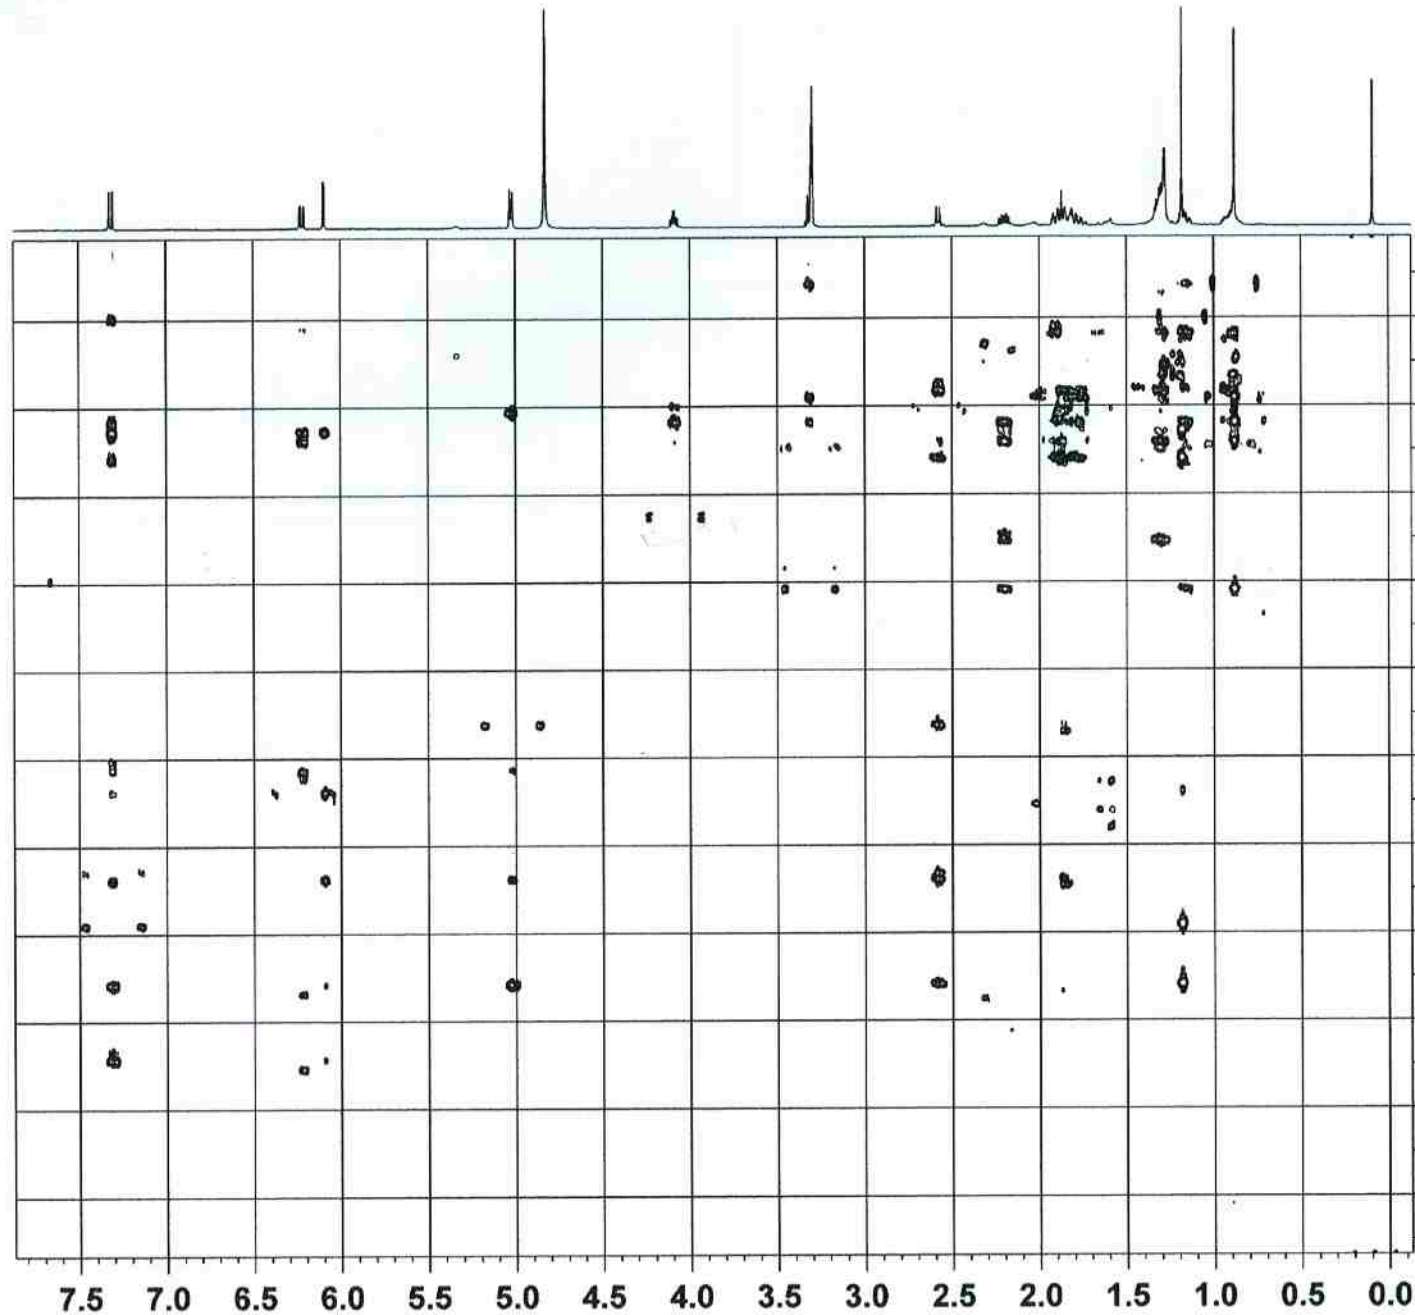

ppm

|                              |                 |
|------------------------------|-----------------|
| NAME                         | may19-12        |
| EXPNO                        | 13              |
| PROCNO                       | 1               |
| Date_                        | 20120519        |
| Time                         | 21.29           |
| INSTRUM                      | spect           |
| PROBHD                       | 5 mm BBI 1H/D-  |
| PULPROG                      | hmbcgp1pndqf    |
| TD                           | 4096            |
| SOLVENT                      | MeOD            |
| NS                           | 64              |
| DS                           | 8               |
| SWH                          | 4006.410 Hz     |
| FIDRES                       | 0.978127 Hz     |
| AQ                           | 0.5113556 sec   |
| RG                           | 23170.5         |
| DW                           | 124.800 usec    |
| DE                           | 6.50 usec       |
| TE                           | 302.0 K         |
| CNST2                        | 145.0000000     |
| CNST13                       | 10.0000000      |
| D0                           | 0.00000300 sec  |
| D1                           | 2.00000000 sec  |
| D2                           | 0.00344828 sec  |
| D6                           | 0.05000000 sec  |
| D16                          | 0.00010000 sec  |
| IN0                          | 0.00001715 sec  |
| ----- CHANNEL f1 -----       |                 |
| NUC1                         | 1H              |
| P1                           | 7.60 usec       |
| P2                           | 15.20 usec      |
| PL1                          | 6.00 dB         |
| SFO1                         | 500.1319505 MHz |
| ----- CHANNEL f2 -----       |                 |
| NUC2                         | 13C             |
| P3                           | 13.25 usec      |
| PL2                          | -2.85 dB        |
| SFO2                         | 125.7723769 MHz |
| ----- GRADIENT CHANNEL ----- |                 |
| GPNAME1                      | SINE.100        |
| GPNAME2                      | SINE.100        |
| GPNAME3                      | SINE.100        |
| GPZ1                         | 50.00 %         |
| GPZ2                         | 30.00 %         |
| GPZ3                         | 40.10 %         |
| F16                          | 1000.00 usec    |
| ND0                          | 2               |
| TD                           | 256             |
| SFO1                         | 125.7724 MHz    |
| FIDRES                       | 113.981216 Hz   |
| SW                           | 232.000 ppm     |
| FMODE                        | QF              |
| SI                           | 1024            |
| SF                           | 500.1300158 MHz |
| WDW                          | QSINE           |
| SSB                          | 0               |
| LB                           | 0.00 Hz         |
| GB                           | 0               |
| PC                           | 4.00            |
| SI                           | 1024            |
| MC2                          | QF              |
| SF                           | 125.7576112 MHz |
| WDW                          | QSINE           |
| SSB                          | 0               |
| LB                           | 0.00 Hz         |
| GB                           | 0               |

7.5 7.0 6.5 6.0 5.5 5.0 4.5 4.0 3.5 3.0 2.5 2.0 1.5 1.0 0.5 0.0 ppm

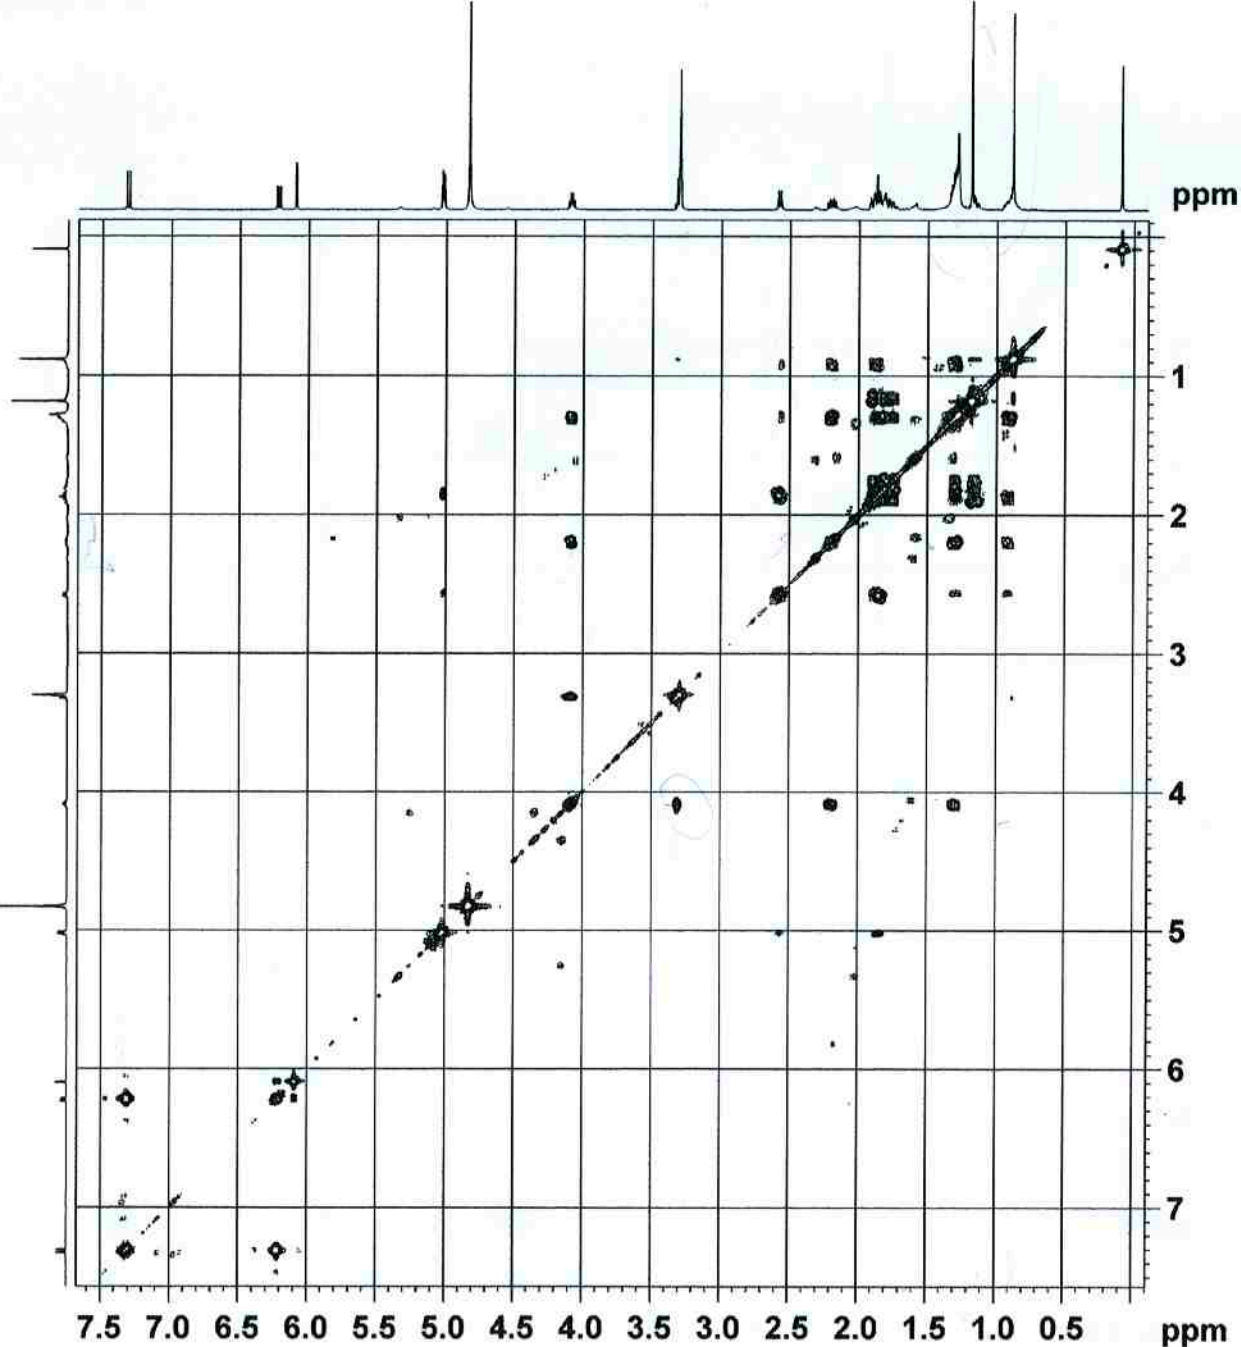

NAME may19-12  
 EXPNO 10  
 PROCNO 1  
 Date\_ 20120519  
 Time\_ 13.44  
 INSTRUM spect  
 PROBHD 5 mm BBI 1H/D-  
 PULPROG cosygpgqf  
 TD 2048  
 SOLVENT MeOD  
 NS 8  
 DS 8  
 SWH 4006.410 Hz  
 FIDRES 1.956255 Hz  
 AQ 0.2557652 sec  
 RG 256  
 DW 124.800 usec  
 DE 6.50 usec  
 TE 299.8 K  
 D0 0.00000300 sec  
 D1 1.50000000 sec  
 D13 0.00000400 sec  
 D16 0.00010000 sec  
 IN0 0.00024960 sec

===== CHANNEL f1 =====  
 NUC1 1H  
 P0 7.60 usec  
 P1 7.60 usec  
 PL1 6.00 dB  
 SFO1 500.1319505 MHz

===== GRADIENT CHANNEL =====  
 GPNAM1 SINE.100  
 GPZ1 10.00 %  
 P16 1000.00 usec  
 ND0 1  
 TD 256  
 SFO1 500.132 MHz  
 FIDRES 15.650039 Hz  
 SW 8.011 ppm  
 FnmODE QF  
 SI 1024  
 SF 500.1300158 MHz  
 WDW SINE  
 SSB 0  
 LB 0.00 Hz  
 GB 0  
 PC 4.00  
 SI 1024  
 MC2 QF  
 SF 500.1300158 MHz  
 WDW SINE  
 SSB 0  
 LB 0.00 Hz  
 GB 0

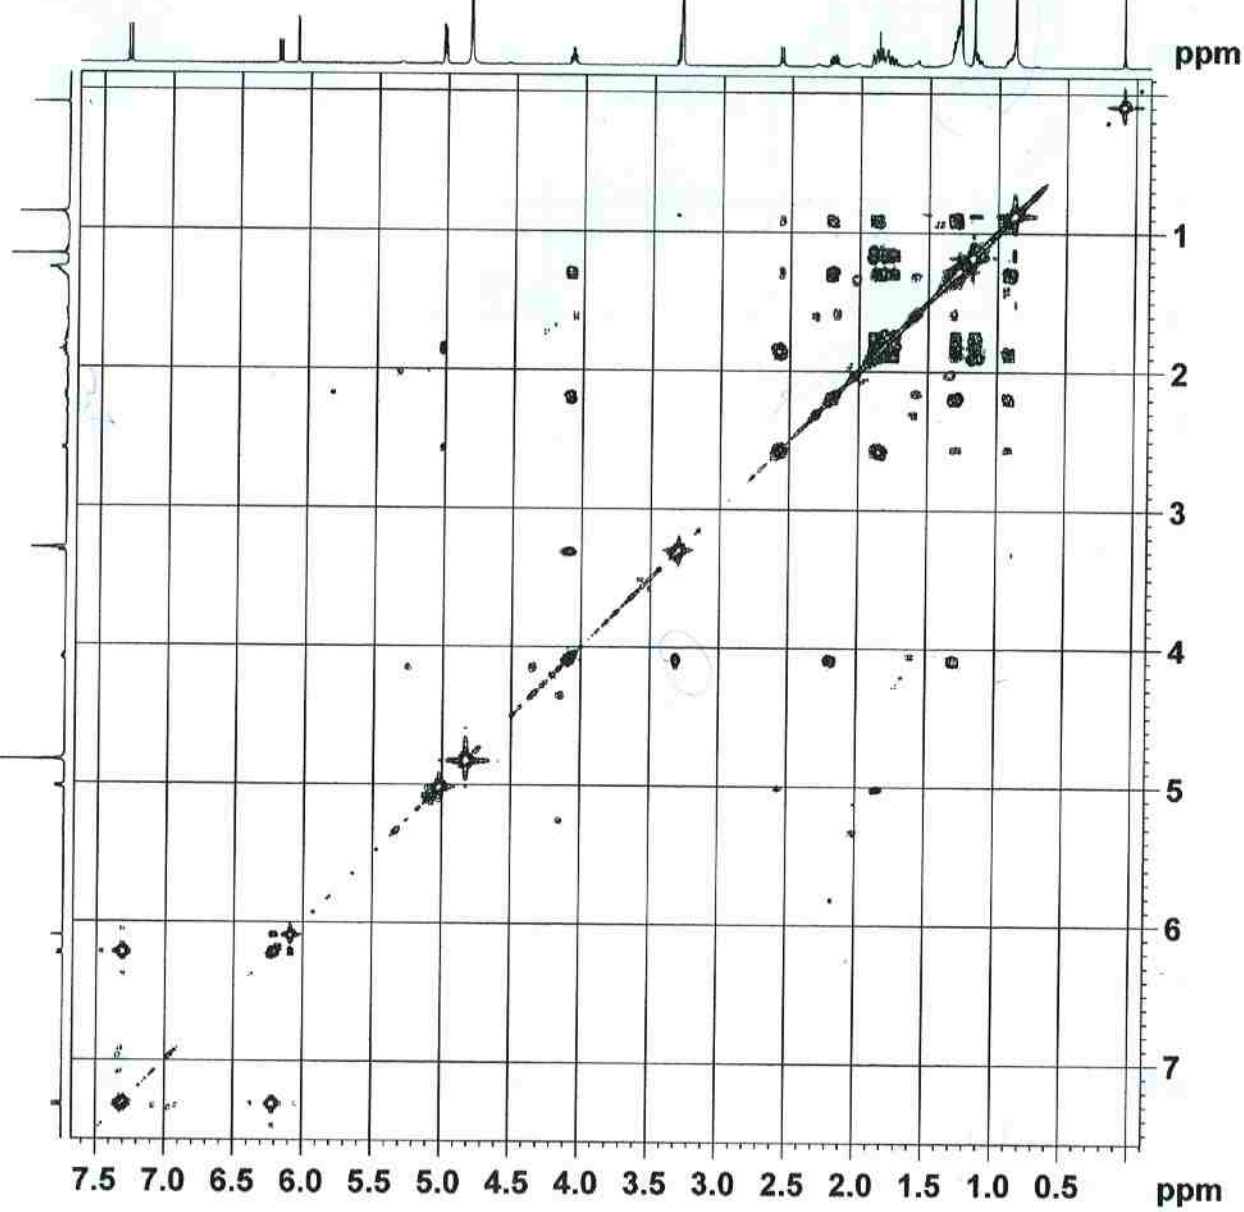

NAME may19-12  
 EXPNO 10  
 PROCNO 1  
 Date\_ 20120519  
 Time 13.44  
 INSTRUM spect  
 PROBHD 5 mm BBI 1H/D-  
 PULPROG cosygppqf  
 TD 2048  
 SOLVENT MeOD  
 NS 8  
 DS 8  
 SWH 4006.410 Hz  
 FIDRES 1.956255 Hz  
 AQ 0.2557652 sec  
 RG 256  
 DW 124.800 usec  
 DE 6.50 usec  
 TE 299.8 K  
 D0 0.00000300 sec  
 D1 1.50000000 sec  
 D13 0.00000400 sec  
 D16 0.00010000 sec  
 IN0 0.00024960 sec

===== CHANNEL f1 =====  
 NUC1 1H  
 P0 7.60 usec  
 P1 7.60 usec  
 PL1 6.00 dB  
 SFO1 500.1319505 MHz

===== GRADIENT CHANNEL =====  
 GPNAM1 SINE.100  
 GPZ1 10.00 %  
 P16 1000.00 usec  
 ND0 1  
 TD 256  
 SFO1 500.132 MHz  
 FIDRES 15.650039 Hz  
 SW 8.011 ppm  
 FnMODE QF  
 SI 1024  
 SF 500.1300158 MHz  
 WDW SINE  
 SSB 0  
 LB 0.00 Hz  
 GB 0  
 PC 4.00  
 SI 1024  
 MC2 QF  
 SF 500.1300158 MHz  
 WDW SINE  
 SSB 0  
 LB 0.00 Hz  
 GB 0
