# Supplementary material for: Microbial transformation of anti-cancer steroid exemestane and cytotoxicity of its metabolites against cancer cell lines
Source: PubMed Central journal article supplement (PMC3637571; doi:10.1186/1752-153x-7-57), 2013-03-27
Supplement: 1752-153X-7-57-S3.pdf [file 1752-153X-7-57-S3.pdf]

Scan: 12

Base: m/z 148; 45.4%FS TIC: 8598120

R.T.: .98

#Ions: 268

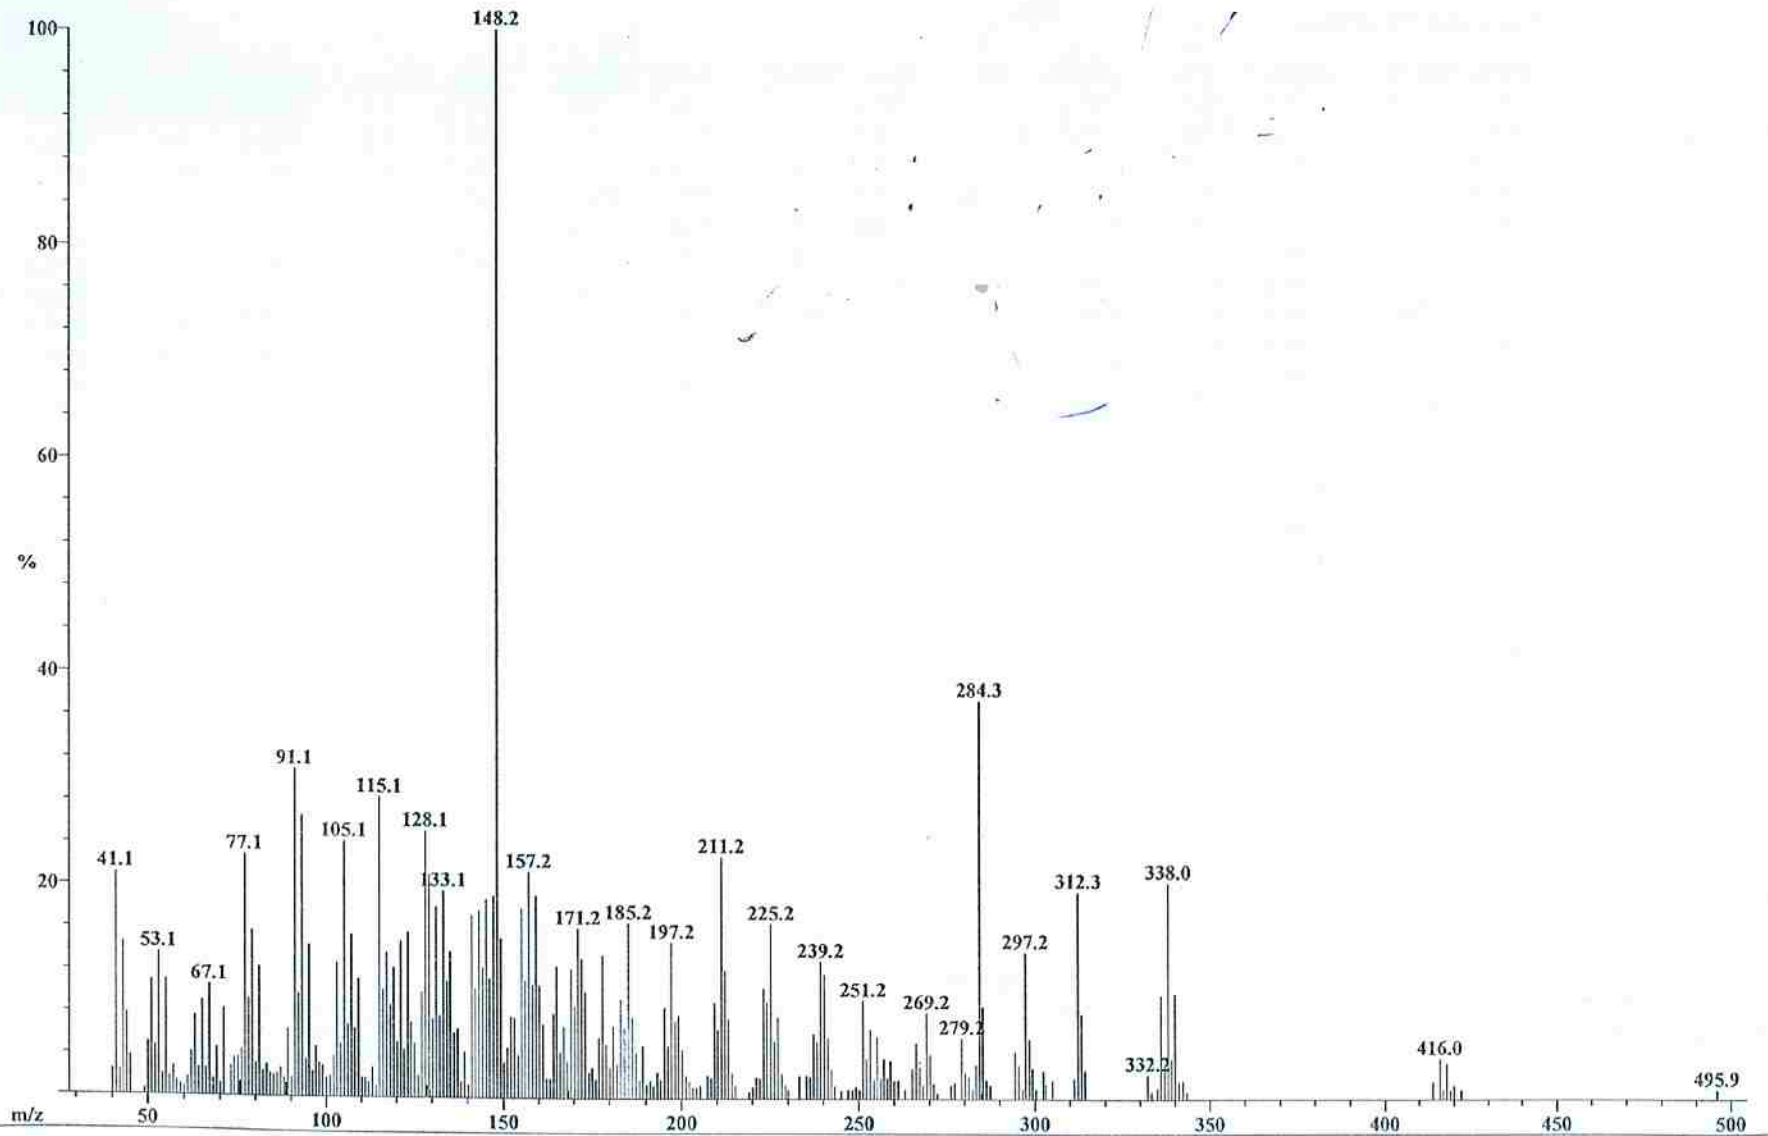

# Scan Graph

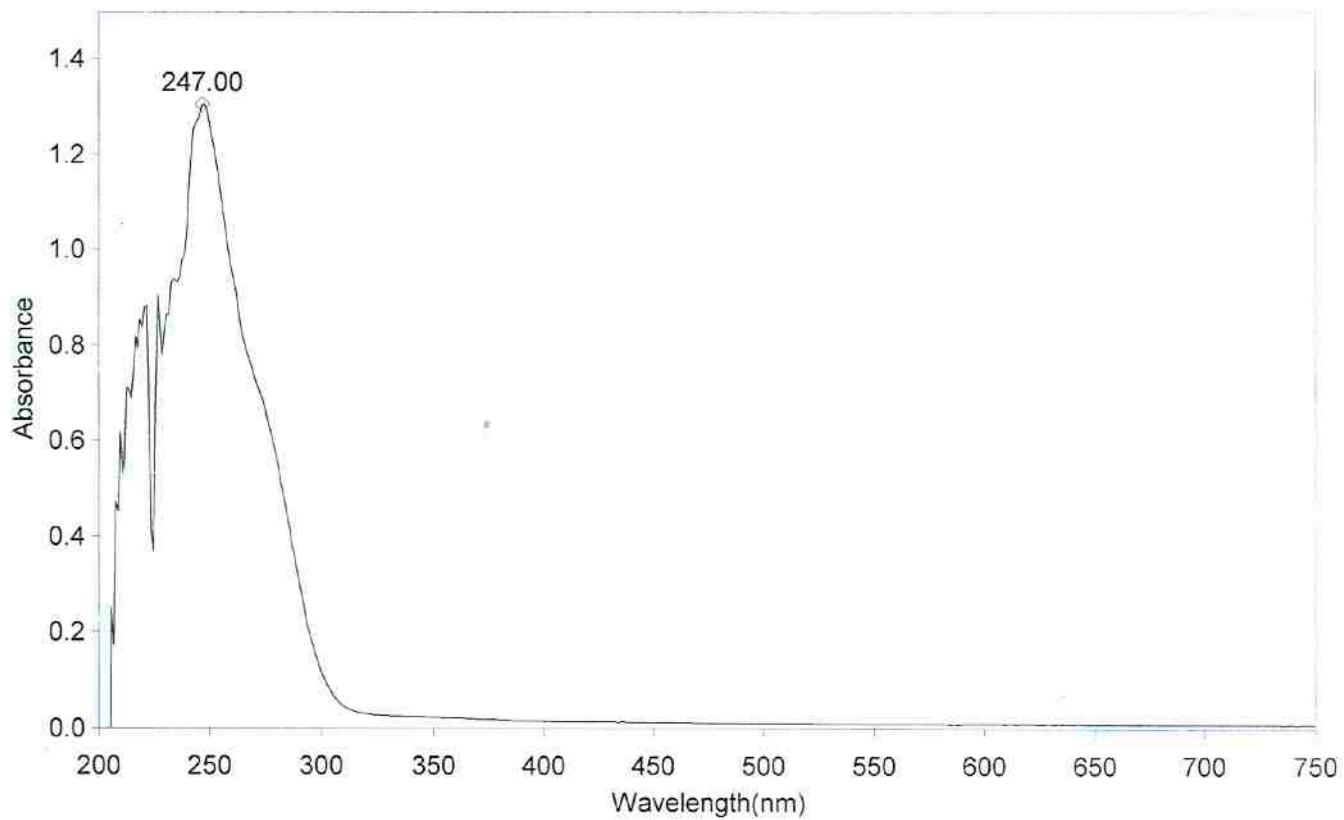

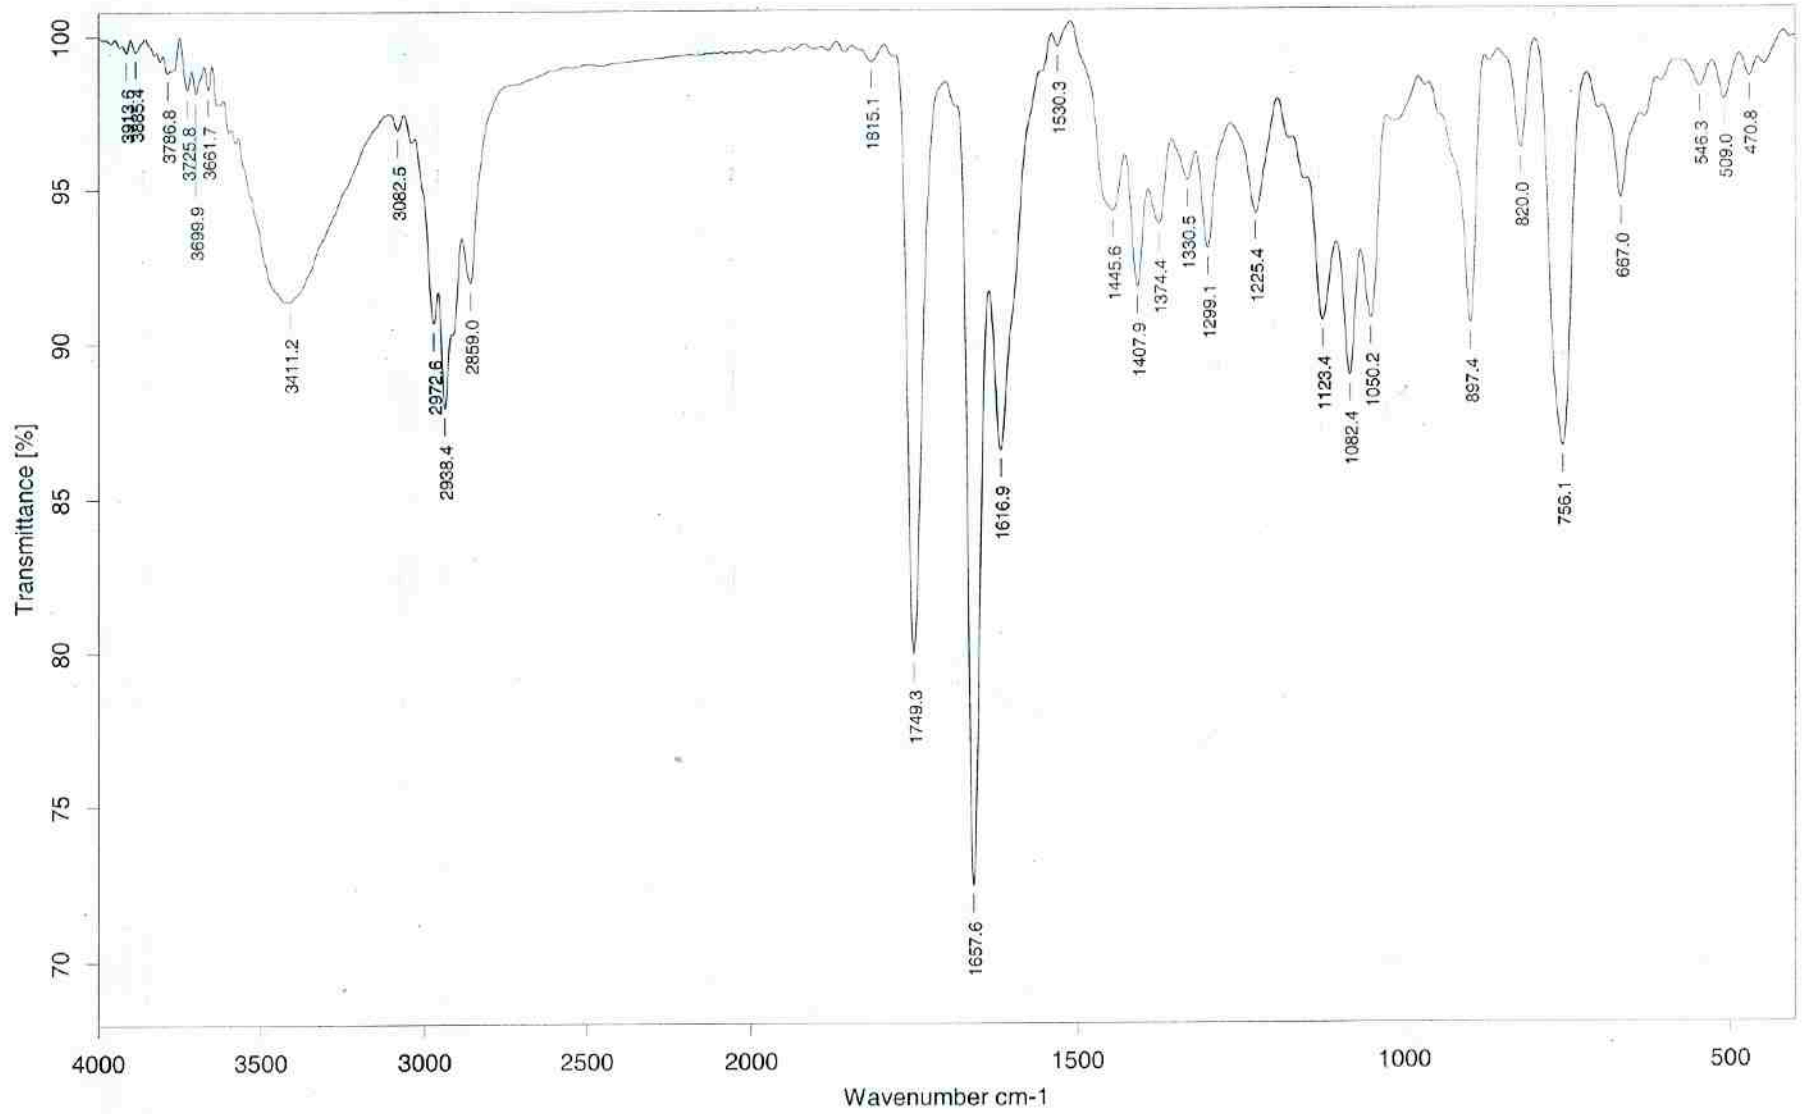

7.354  
7.320  
6.268  
6.262  
6.234  
6.228  
6.125  
6.118  
5.061  
5.045  
5.040  
4.849  
3.772  
3.310  
3.305  
3.300  
3.295  
3.289  
2.589  
2.558  
2.319  
2.283  
2.258  
2.012  
2.003  
1.984  
1.969  
1.960  
1.954  
1.939  
1.920  
1.876  
1.857  
1.828  
1.815  
1.632  
1.625  
1.529  
1.515  
1.488  
1.474  
1.448  
1.212  
0.818

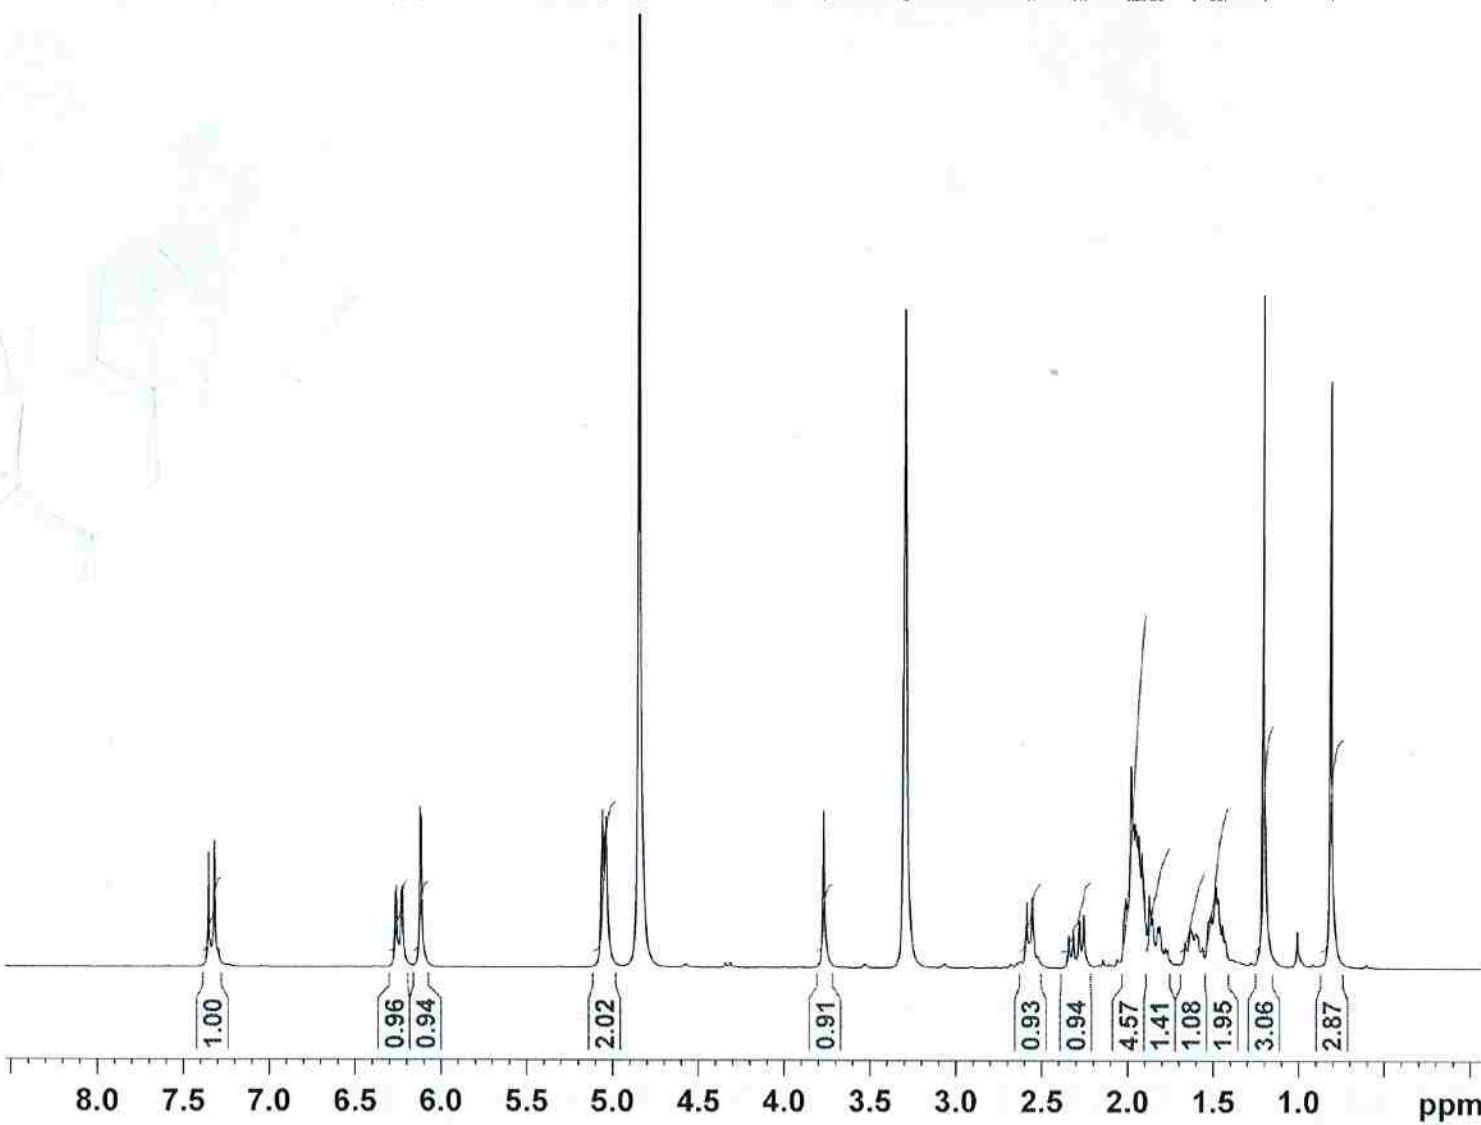

NAME may18  
EXPNO 2  
PROCNO 1  
Date\_ 20120518  
Time\_ 11.34  
INSTRUM spect  
PROBHD 5 mm DUL 13C-1  
PULPROG zg30  
TD 32768  
SOLVENT MeOD  
NS 64  
DS 0  
SWH 6172.839 Hz  
FIDRES 0.188380 Hz  
AQ 2.6542580 sec  
RG 512  
DW 81.000 usec  
DE 6.50 usec  
TE 296.7 K  
D1 1.50000000 sec  
TDO 1

===== CHANNEL f1 =====  
NUC1 1H  
P1 12.80 usec  
PL1 5.00 dB  
SFO1 300.1324010 MHz  
SI 32768  
SF 300.1300076 MHz  
WDW EM  
SSB 0  
LB 0.30 Hz  
GB 0  
PC 1.00

M.Asif / Dr. Iqbal / Arc-1-2-10  
BB

LAB NO. 116

—217.70  
—188.66  
—171.22  
—157.68  
—147.31

—127.90  
—122.87  
—112.91

86.89  
51.47  
49.85  
49.57  
49.28  
49.00  
48.71  
48.43  
48.14  
45.51  
45.46  
43.59  
41.21  
37.03  
36.65  
35.98  
23.28

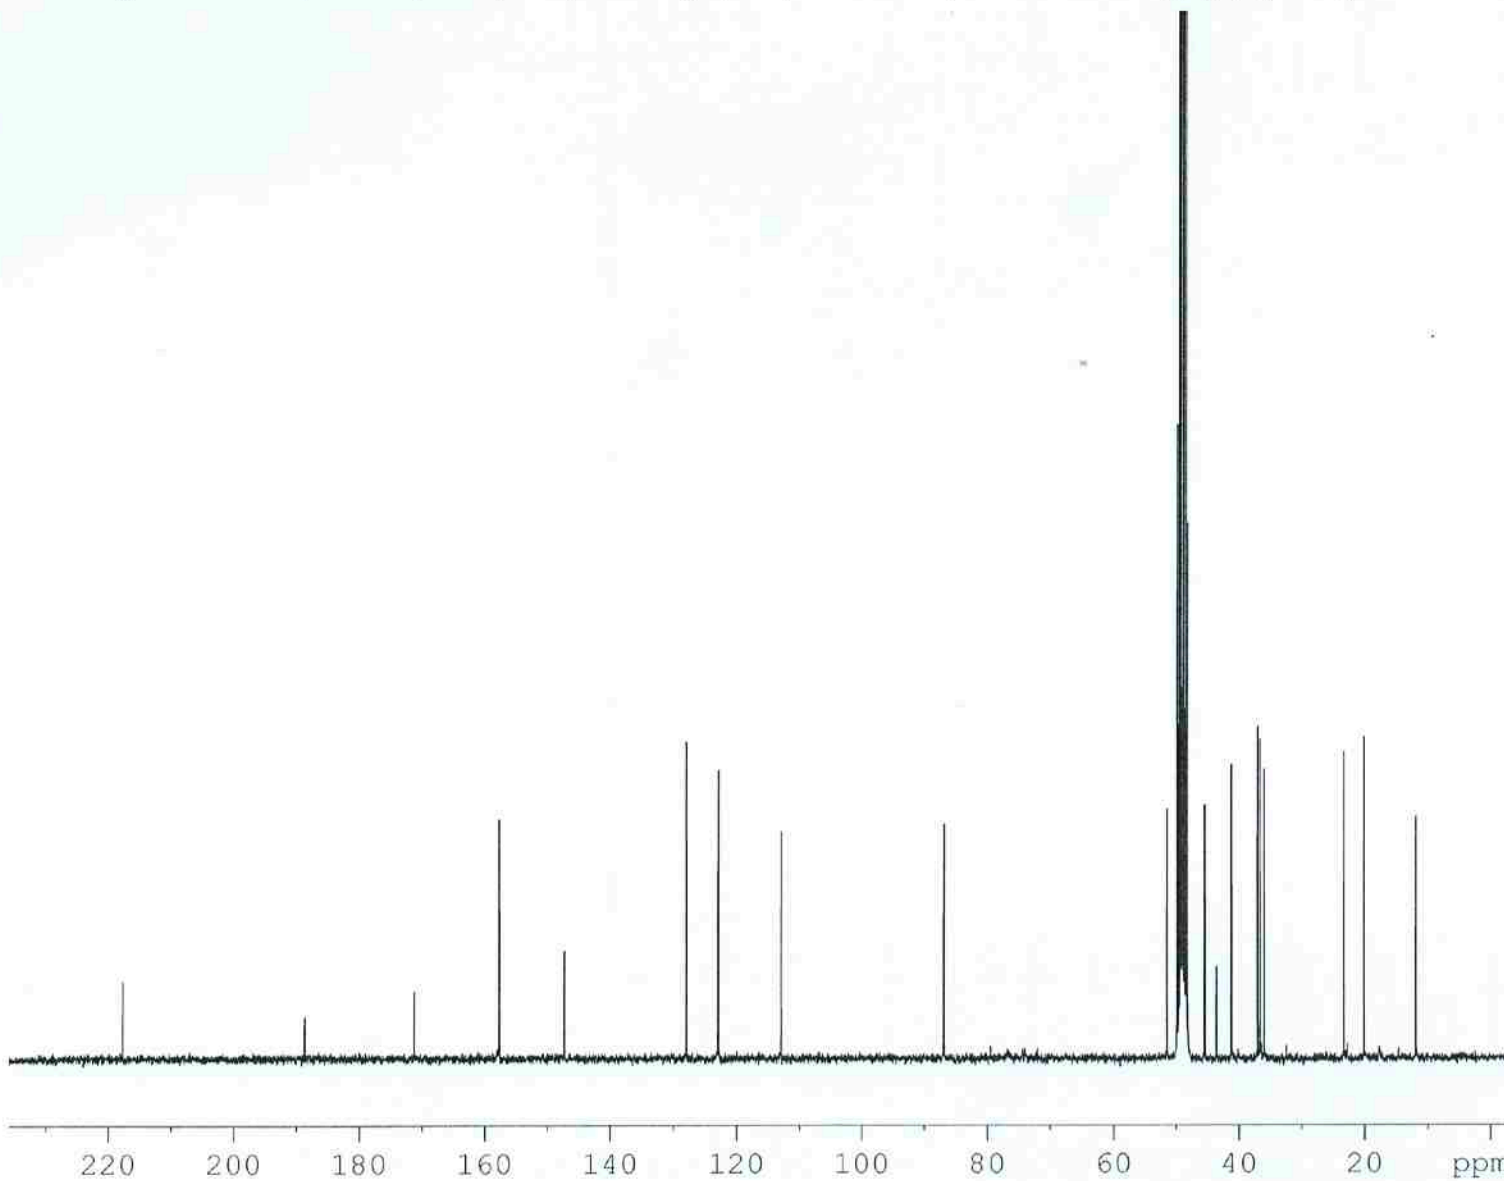

NAME jun08  
EXPNO 1  
PROCNO 1  
Date\_ 20120608  
Time 12.51  
INSTRUM Spect  
PROBHD 5 mm BBO BB-1H  
PULPROG zgpg  
TD 32768  
SOLVENT MeOD  
NS 18432  
DS 2  
SWH 18028.846 Hz  
FIDRES 0.550197 Hz  
AQ 0.9088159 sec  
RG 22.6  
DW 27.733 usec  
DE 6.50 usec  
TE 300.0 K  
D1 1.5000000 sec  
D11 0.03000000 sec  
TDO 18

==== CHANNEL f1 =====  
NUC1 13C  
P1 11.00 usec  
PL1 0.00 dB  
PL1W 28.88669395 W  
SFO1 75.4764278 MHz

==== CHANNEL f2 =====  
CPDPRG2 waltz16  
NUC2 1H  
PCPD2 80.00 usec  
PL2 120.00 dB  
PL12 17.00 dB  
PL13 17.00 dB  
PL2W 0.00000000 W  
PL12W 0.26262212 W  
PL13W 0.26262212 W  
SFO2 300.1315007 MHz  
SI 16384  
SF 75.4676422 MHz  
WDW EM  
SSB 0  
LB 1.00 Hz  
GB 0  
PC 1.40

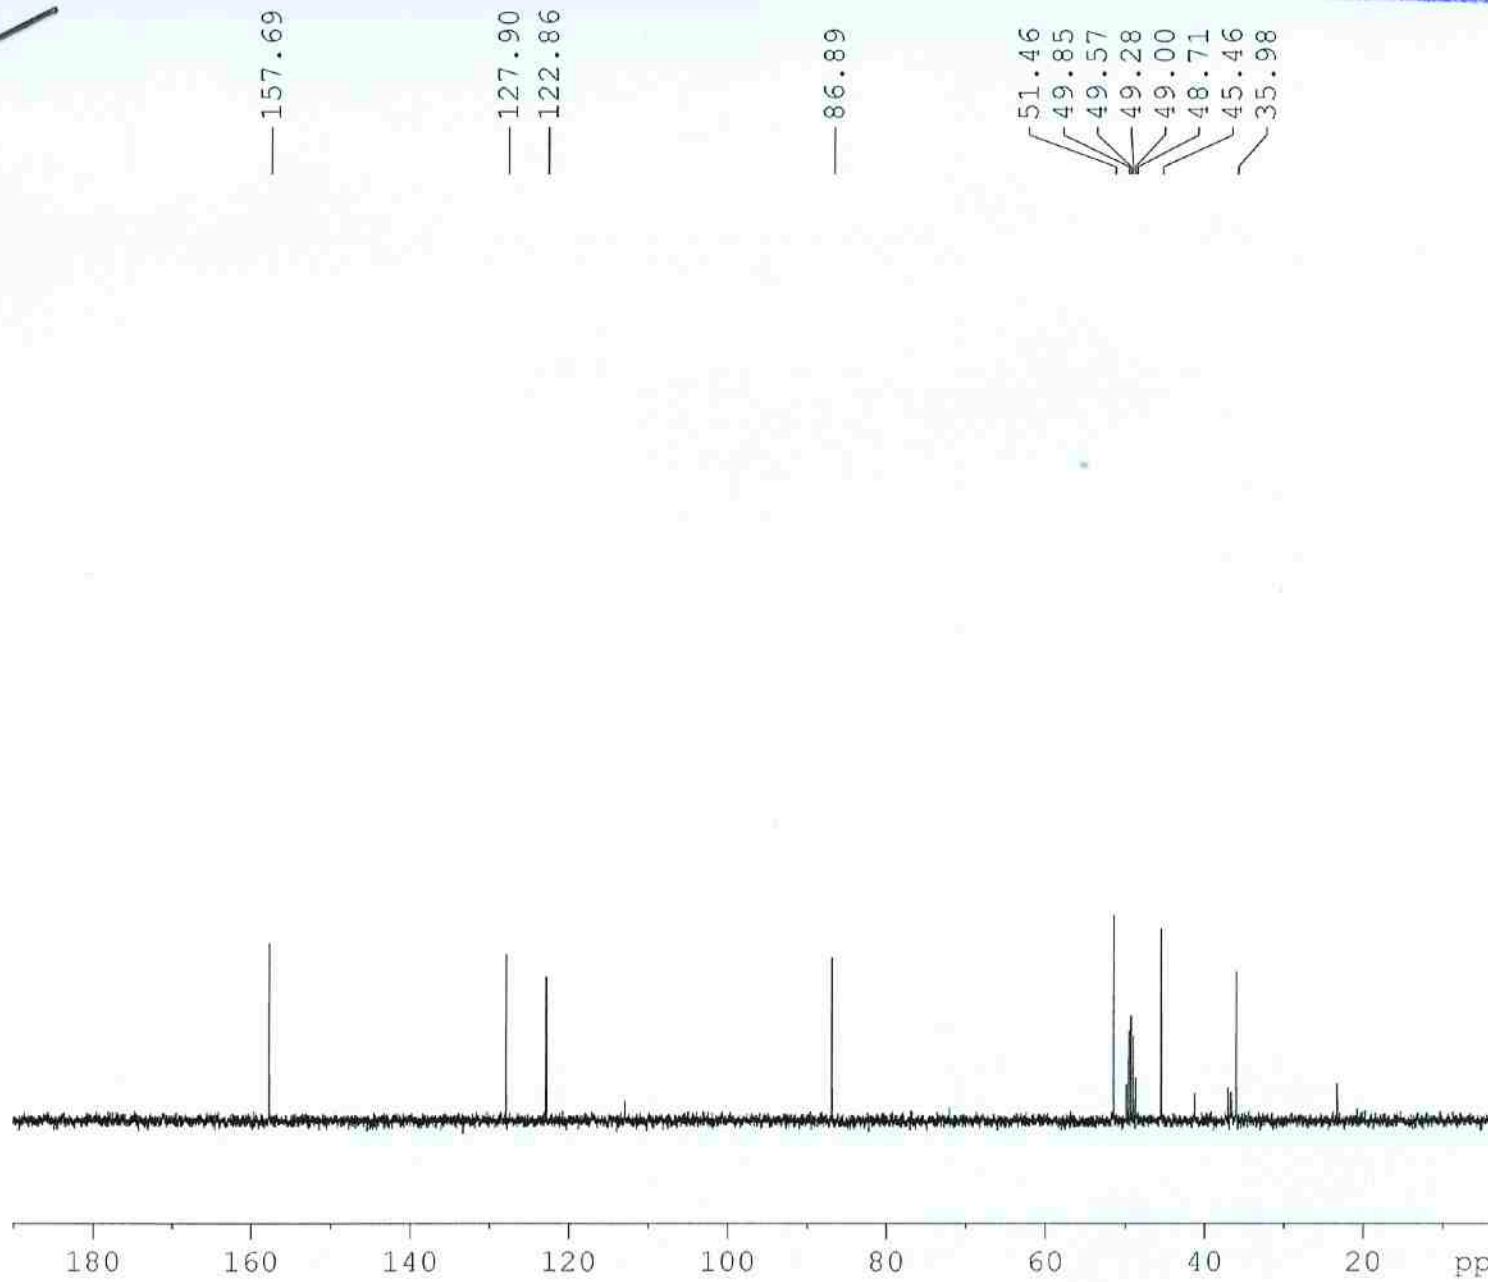

```

NAME                jun08
EXPNO                3
PROCNO              1
Date_               20120609
Time_               7.41
INSTRUM             Spect
PROBHD              5 mm BBO BB-1H
PULPROG             dept90
TD                  32768
SOLVENT             MeOD
NS                  2528
DS                  2
SWH                 14367.816 Hz
FIDRES              0.438471 Hz
AQ                  1.1403764 sec
RG                  203
DW                  34.800 usec
DE                  6.50 usec
TE                  300.0 K
CNST2               145.0000000
D1                  1.5000000 sec
D2                  0.00344828 sec
D12                 0.00002000 sec
TD0                 4

```

```

===== CHANNEL f1 =====
NUC1                 13C
P1                   11.00 usec
P2                   22.00 usec
PL1                  0.00 dB
PL1W                 28.88669395 W
SFO1                 75.4749184 MHz

```

```

===== CHANNEL f2 =====
CPDPRG2             waltz16
NUC2                 1H
P3                   12.00 usec
P4                   24.00 usec
PCPD2               80.00 usec
PL2                  0.00 dB
PL12                 17.00 dB
PL2W                 13.16228485 W
PL12W                0.26262212 W
SFO2                 300.1315007 MHz
SI                   16384
SF                   75.4676422 MHz
WDW                  EM
SSB                  0
LB                   1.00 Hz
GB                   0
PC                   1.00

```

180 160 140 120 100 80 60 40 20 ppm

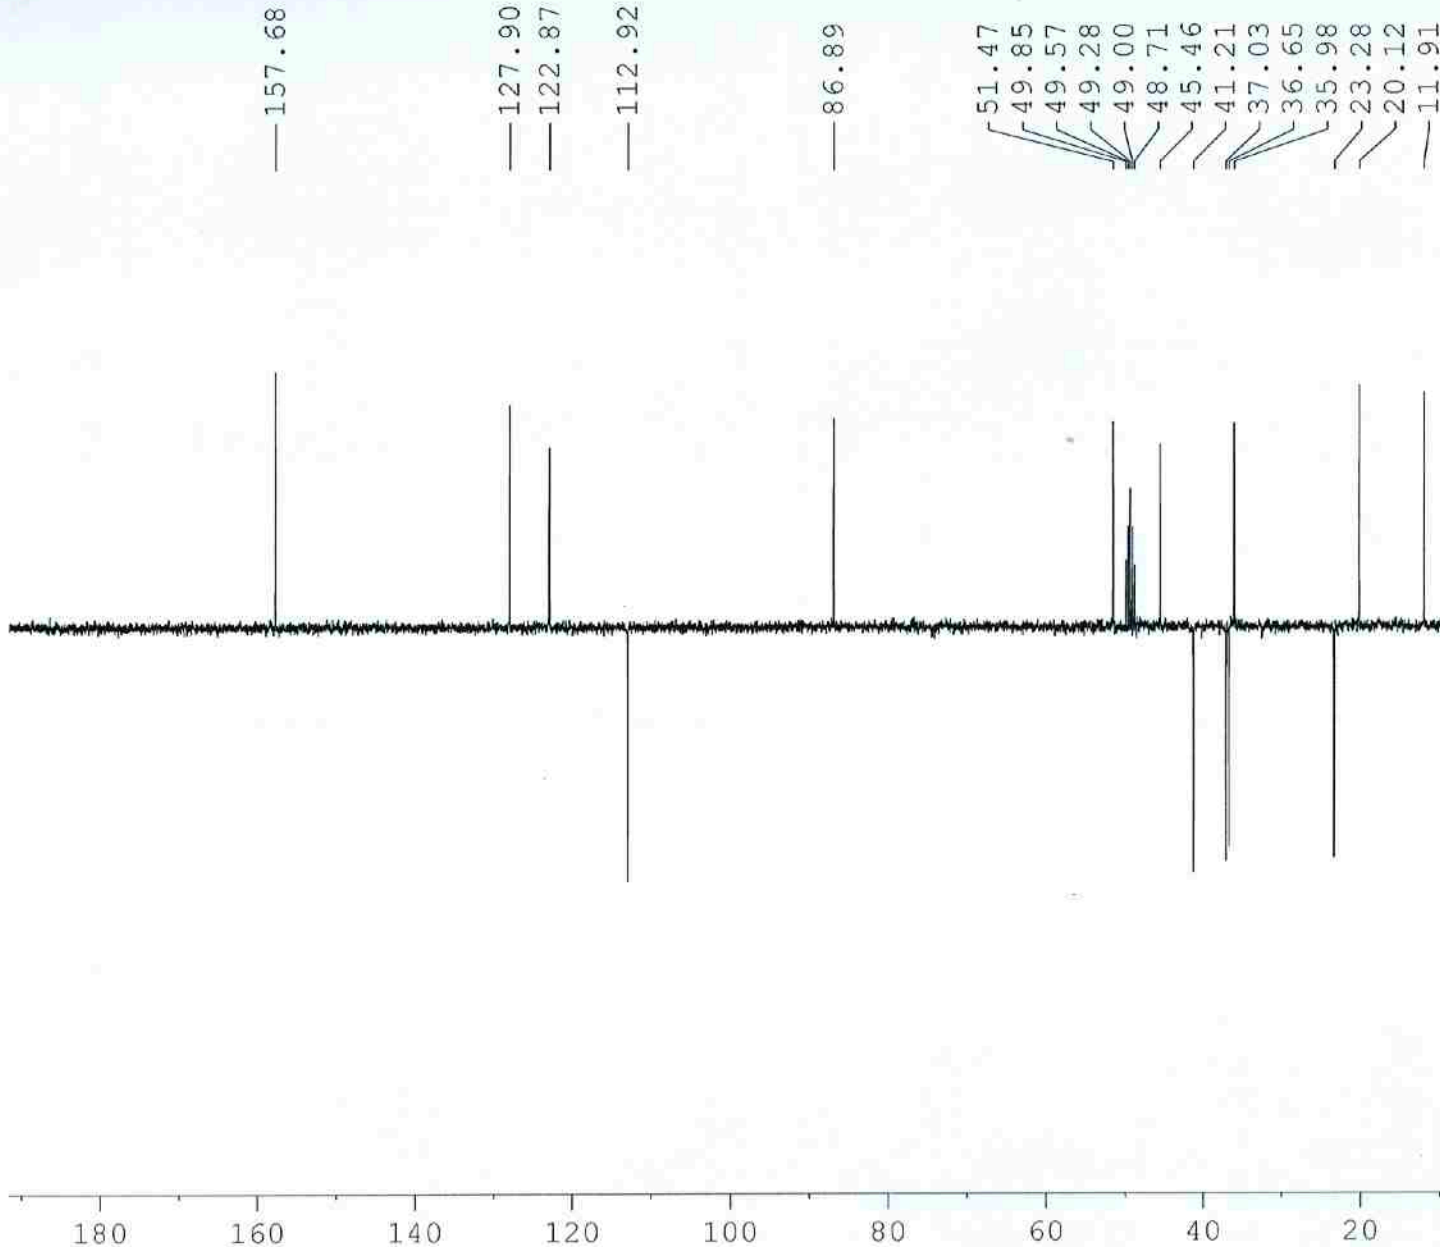

```

NAME                jun08
EXPNO                2
PROCNO              1
Date_               20120609
Time_               1.34
INSTRUM             Spect
PROBHD              5 mm BBO BB-1H
PULPROG             dept135
TD                  32768
SOLVENT             MeOD
NS                  8192
DS                  2
SWH                 14367.816 Hz
FIDRES              0.438471 Hz
AQ                  1.1403764 sec
RG                  203
DW                  34.800 usec
DE                  6.50 usec
TE                  300.0 K
CNST2               145.0000000
D1                  1.50000000 sec
D2                  0.00344828 sec
D12                 0.00002000 sec
TD0                 8

```

```

===== CHANNEL f1 =====
NUC1                 13C
P1                   11.00 usec
P2                   22.00 usec
PL1                  0.00 dB
PL1W                 28.88669395 W
SFO1                 75.4749184 MHz

```

```

===== CHANNEL f2 =====
CPDPRG2             waltz16
NUC2                 1H
P3                   12.00 usec
P4                   24.00 usec
PCPD2               80.00 usec
PL2                  0.00 dB
PL12                 17.00 dB
PL2W                 13.16228485 W
PL12W                0.26262212 W
SFO2                 300.1315007 MHz
SI                   16384
SF                   75.4676422 MHz
WDW                  EM
SSB                  0
LB                   1.00 Hz
GB                   0
PC                   1.00

```



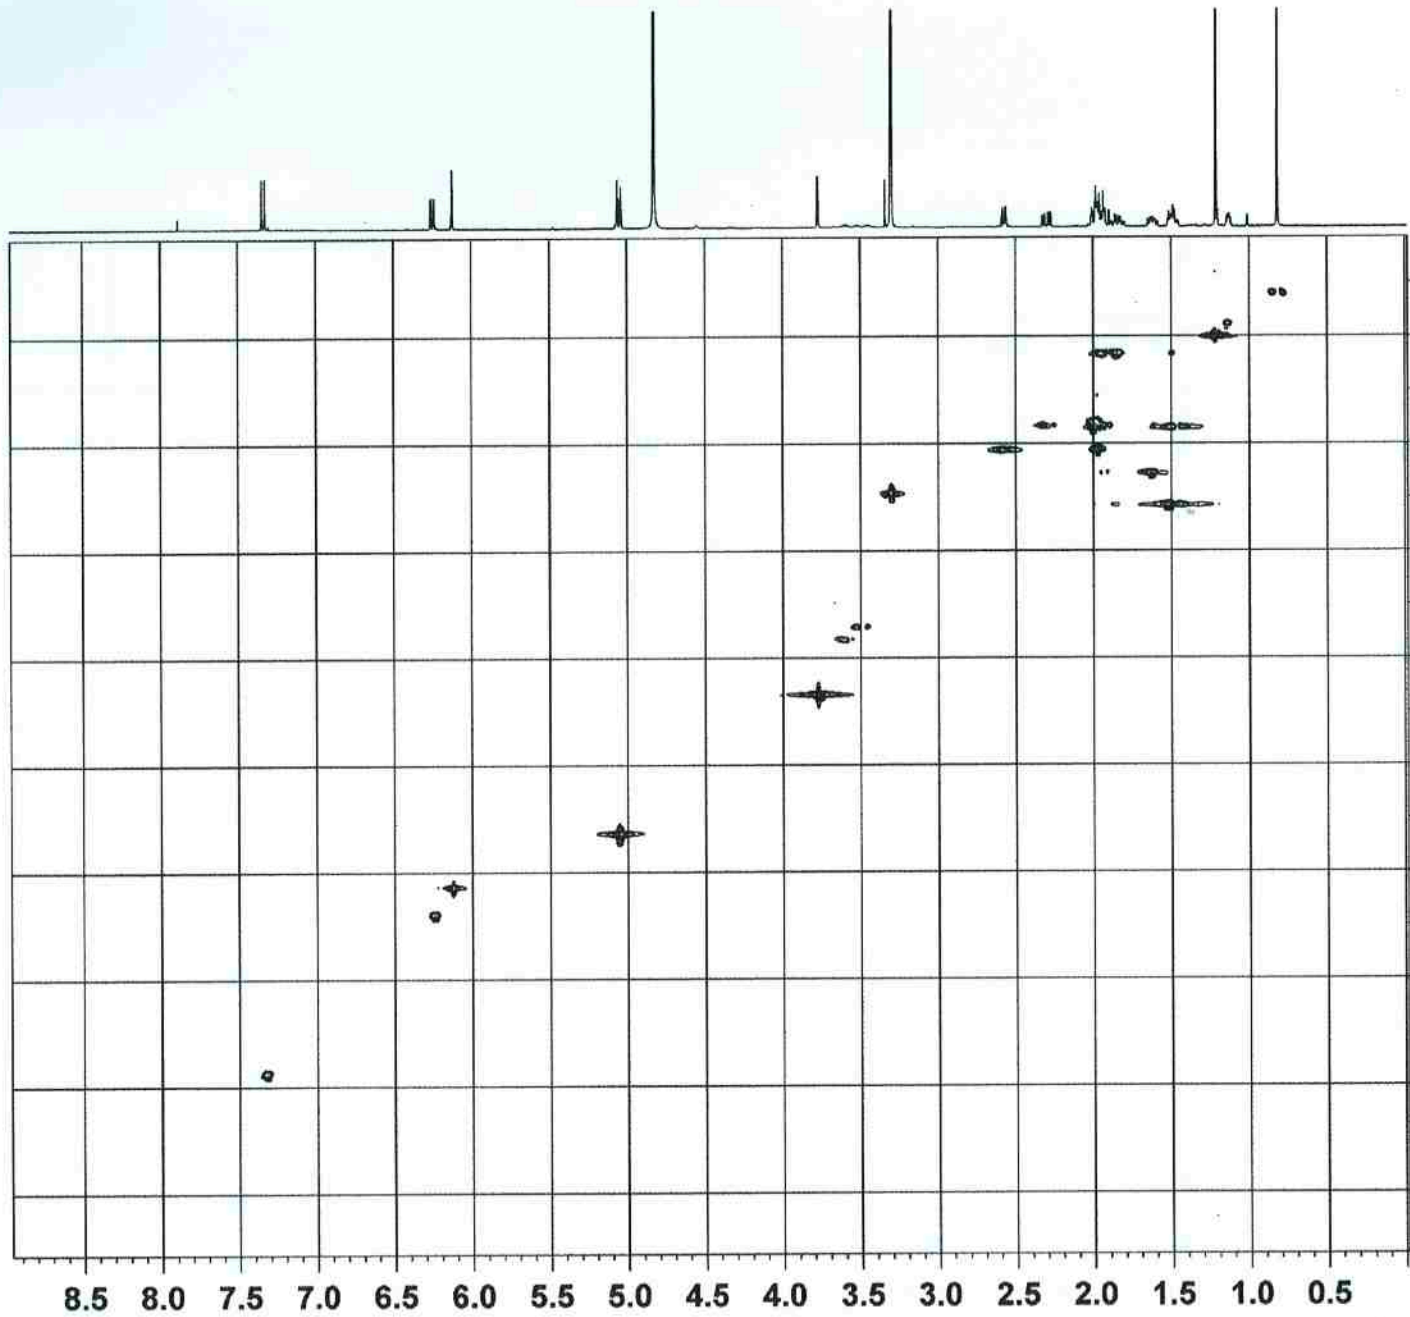

NAME may29-12  
 EXPNO 13  
 PROCNO 1  
 Date\_ 20120529  
 Time\_ 20.50  
 INSTRUM spect  
 PROBHD 5 mm BBI 1H/D-  
 PULPROG hsqcetps1  
 TD 1024  
 SOLVENT MeOD  
 NS 32  
 DS 8  
 SWH 4496.403 Hz  
 FIDRES 4.391018 Hz  
 AQ 0.1140300 sec  
 RG 23170.5  
 DW 111.200 usec  
 DE 6.50 usec  
 TE 302.4 K  
 CNST2 145.0000000  
 D0 0.00000300 sec  
 D1 1.50000000 sec  
 D4 0.00172414 sec  
 D11 0.03000000 sec  
 D13 0.00000400 sec  
 D16 0.00010000 sec  
 D24 0.00110000 sec  
 IN0 0.00002090 sec  
 ZGPTNS

\*\*\*\*\* CHANNEL f1 \*\*\*\*\*  
 NUC1 1H  
 P1 7.60 usec  
 P2 15.20 usec  
 P28 0.00 usec  
 PL1 6.00 dB  
 SFO1 500.1322506 MHz

\*\*\*\*\* CHANNEL f2 \*\*\*\*\*  
 CPDPRG2 garp  
 NUC2 13C  
 P3 13.25 usec  
 P4 26.50 usec  
 PCPD2 65.00 usec  
 PL2 -2.85 dB  
 PL12 9.65 dB  
 SFO2 125.7697360 MHz

\*\*\*\*\* GRADIENT CHANNEL \*\*\*\*\*  
 GPNAM1 SINE.100  
 GPNAM2 SINE.100  
 GPZ1 80.00 %  
 GPZ2 20.10 %  
 F16 1000.00 usec  
 NDC 2  
 TD 256  
 SFO1 125.7697 MHz  
 FIDRES 93.344727 Hz  
 SW 190.000 ppm  
 FhMODE Echo-Antiecho  
 SI 1024  
 SF 500.1300158 MHz  
 WDW QSINE  
 SSB 2  
 LB 0.00 Hz  
 GB 0  
 PC 4.00  
 SI 1024  
 MC2 echo-antiecho  
 SF 125.7576112 MHz  
 WDW QSINE  
 SSB 2  
 LB 0.00 Hz  
 GB 0



AVANCE  
LAB NO: 109-B

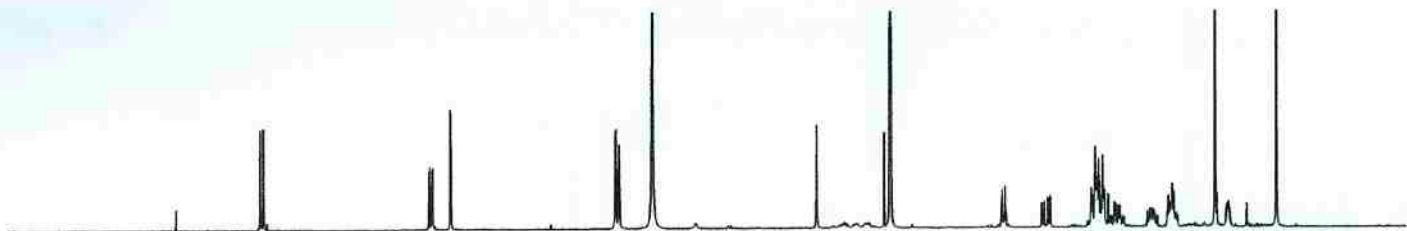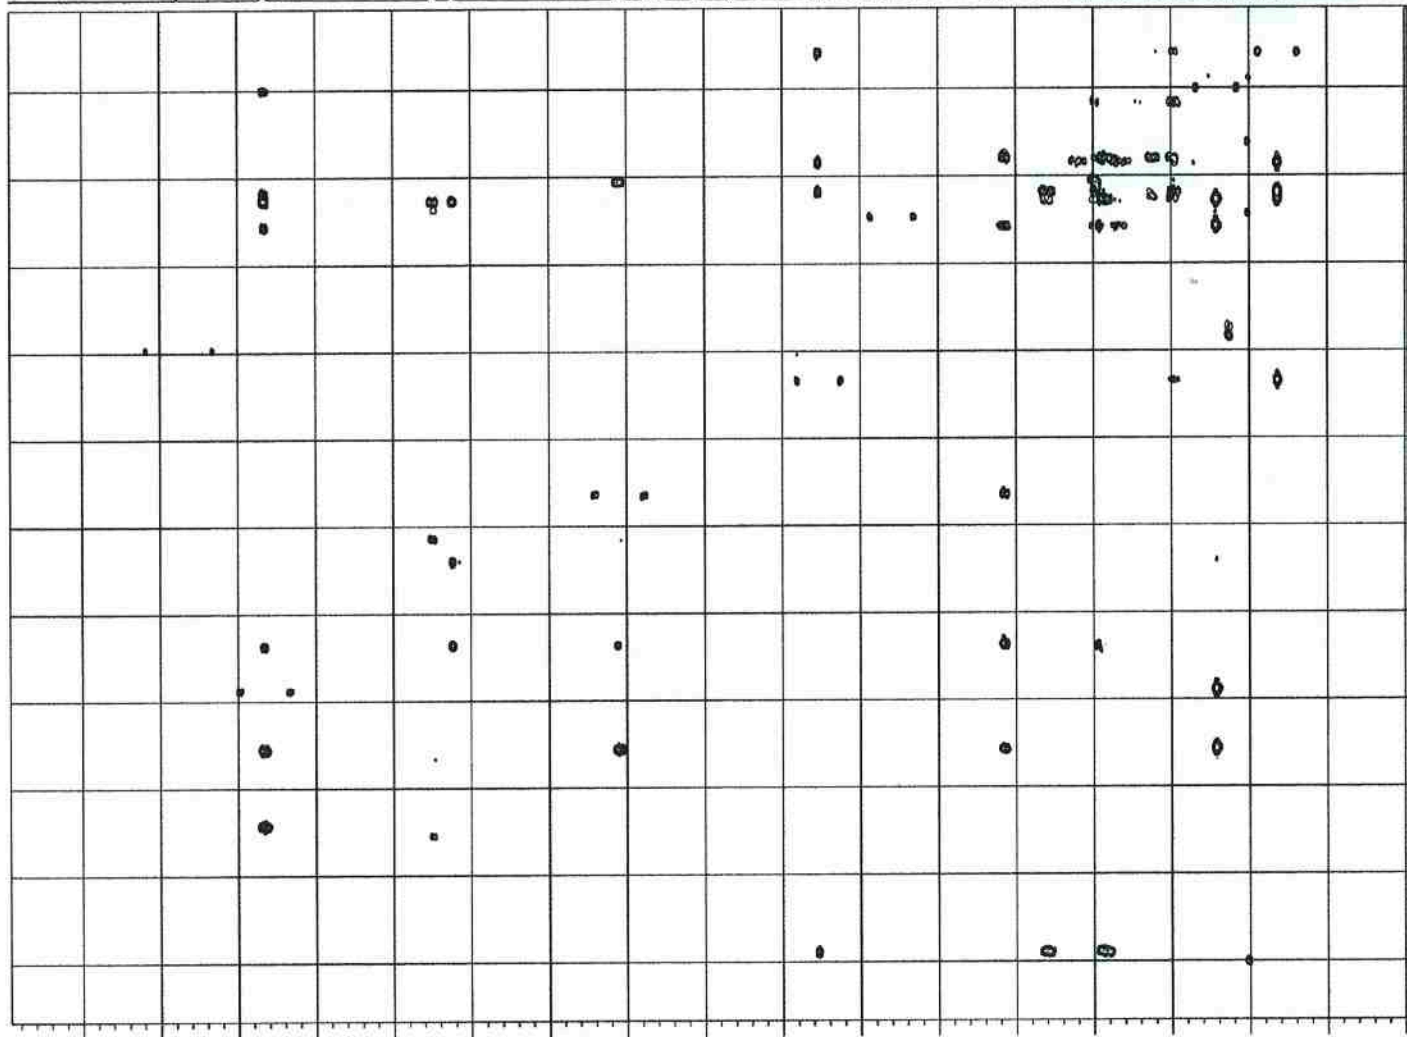

NAME may29-12  
 EXPNO 14  
 PROCNO 1  
 Date 20120530  
 Time 0.35  
 INSTRUM spect  
 PROBHD 5 mm BBI 1H/D-  
 PULPROG hmbcgp1pndqf  
 TD 4096  
 SOLVENT MeOD  
 NS 64  
 DS 8  
 SWH 4496.403 Hz  
 FIDRES 1.097755 Hz  
 AQ 0.4556364 sec  
 RG 23170.5  
 DW 111.200 usec  
 DE 6.50 usec  
 TE 302.9 K  
 CNST2 145.0000000  
 CNST13 10.0000000  
 D0 0.00000300 sec  
 D1 2.00000000 sec  
 D2 0.00344828 sec  
 D6 0.05000000 sec  
 D16 0.00010000 sec  
 IN0 0.00001715 sec

----- CHANNEL f1 -----  
 NUC1 1H  
 P1 7.60 usec  
 P2 15.20 usec  
 PL1 6.00 dB  
 SFO1 500.1322506 MHz

----- CHANNEL f2 -----  
 NUC2 13C  
 P3 13.25 usec  
 PL2 -2.85 dB  
 SFO2 125.7723769 MHz

----- GRADIENT CHANNEL -----  
 GPNAM1 SINE.100  
 GPNAM2 SINE.100  
 GPNAM3 SINE.100  
 GPZ1 50.00 %  
 GPZ2 30.00 %  
 GPZ3 40.10 %  
 P16 1000.00 usec  
 NDC 2  
 TD 199  
 SFO1 125.7724 MHz  
 FIDRES 146.629103 Hz  
 SW 232.000 ppm  
 FMODE QF  
 SI 1024  
 SF 500.1300198 MHz  
 WDW QSINE  
 SSB 0  
 LB 0.00 Hz  
 GB 0  
 PC 4.00  
 SI 1024  
 MC2 QF  
 SF 125.7576112 MHz  
 WDW QSINE  
 SSB 0  
 LB 0.00 Hz  
 GB 0

8.5 8.0 7.5 7.0 6.5 6.0 5.5 5.0 4.5 4.0 3.5 3.0 2.5 2.0 1.5 1.0 0.5 ppm

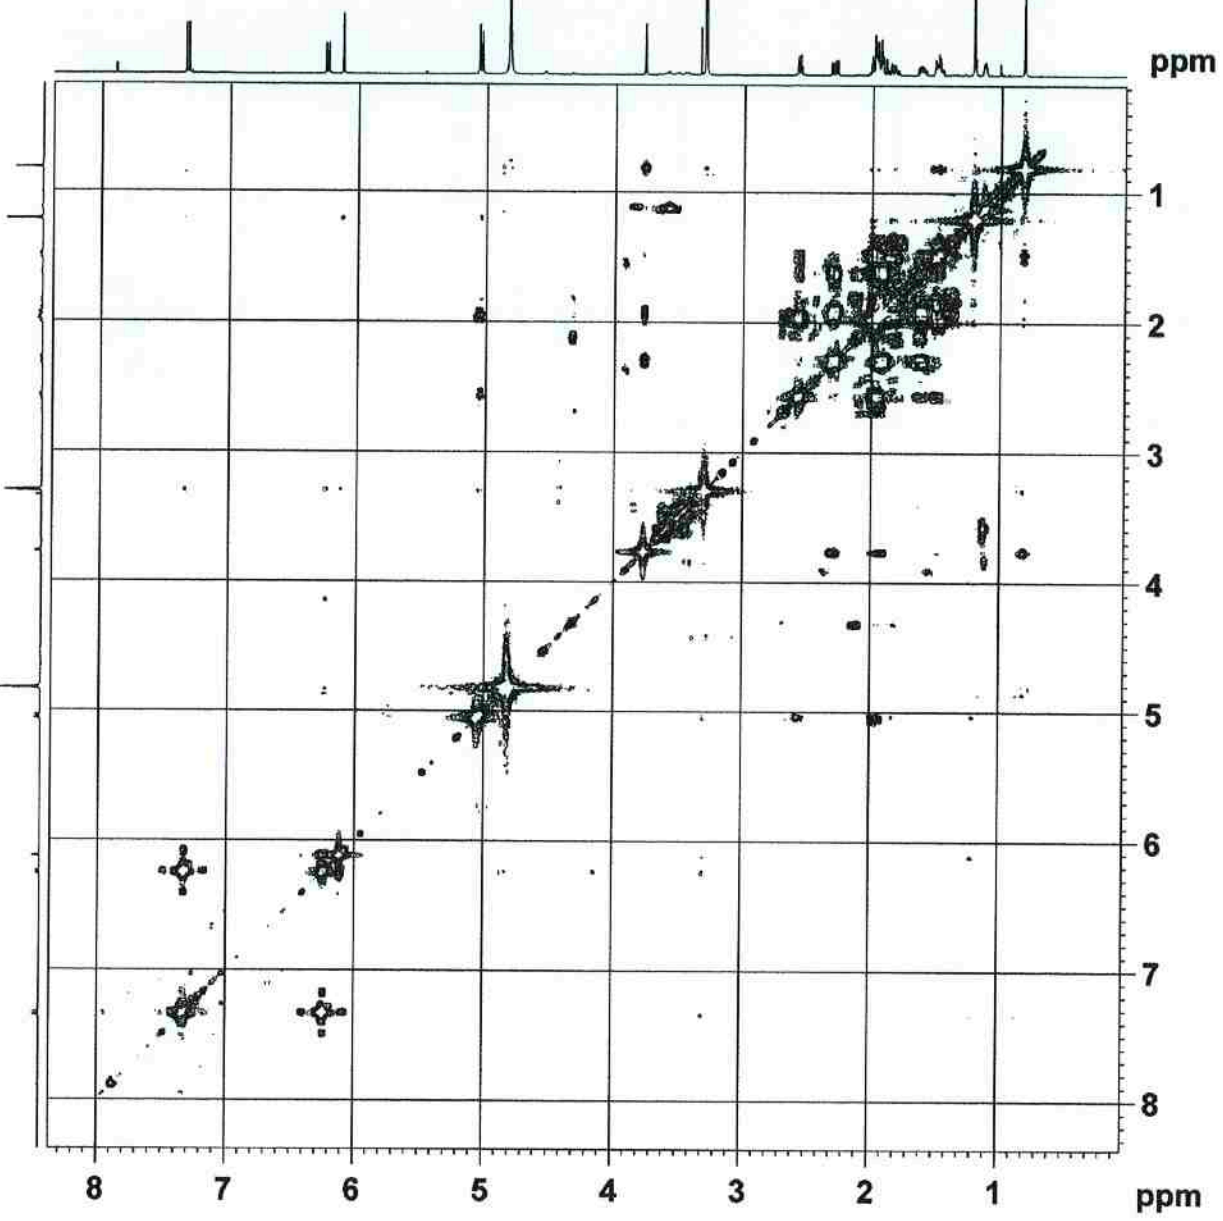

NAME may29-12  
 EXPNO 11  
 PROCNO 1  
 Date\_ 20120529  
 Time 16.55  
 INSTRUM spect  
 PROBHD 5 mm BBI 1H/D-  
 PULPROG cosygpgf  
 TD 2048  
 SOLVENT MeOD  
 NS 8  
 DS 8  
 SWH 4496.403 Hz  
 FIDRES 2.195509 Hz  
 AQ 0.2278988 sec  
 RG 256  
 DW 111.200 usec  
 DE 6.50 usec  
 TE 300.1 K  
 D0 0.0000300 sec  
 D1 1.5000000 sec  
 D13 0.0000400 sec  
 D16 0.0001000 sec  
 IN0 0.00022240 sec

===== CHANNEL f1 =====  
 NUC1 1H  
 P0 7.60 usec  
 P1 7.60 usec  
 PL1 6.00 dB  
 SFO1 500.1322506 MHz

===== GRADIENT CHANNEL =====  
 GPNAM1 SINE.100  
 GPZ1 10.00 %  
 P16 1000.00 usec  
 NDC 1  
 TD 256  
 SFO1 500.1323 MHz  
 FIDRES 17.564074 Hz  
 SW 8.990 ppm  
 FnMODE QF  
 SI 1024  
 SF 500.1300158 MHz  
 WDW SINE  
 SSB 0  
 LB 0.00 Hz  
 GB 0  
 PC 4.00  
 SI 1024  
 MC2 QF  
 SF 500.1300158 MHz  
 WDW SINE  
 SSB 0  
 LB 0.00 Hz  
 GB 0

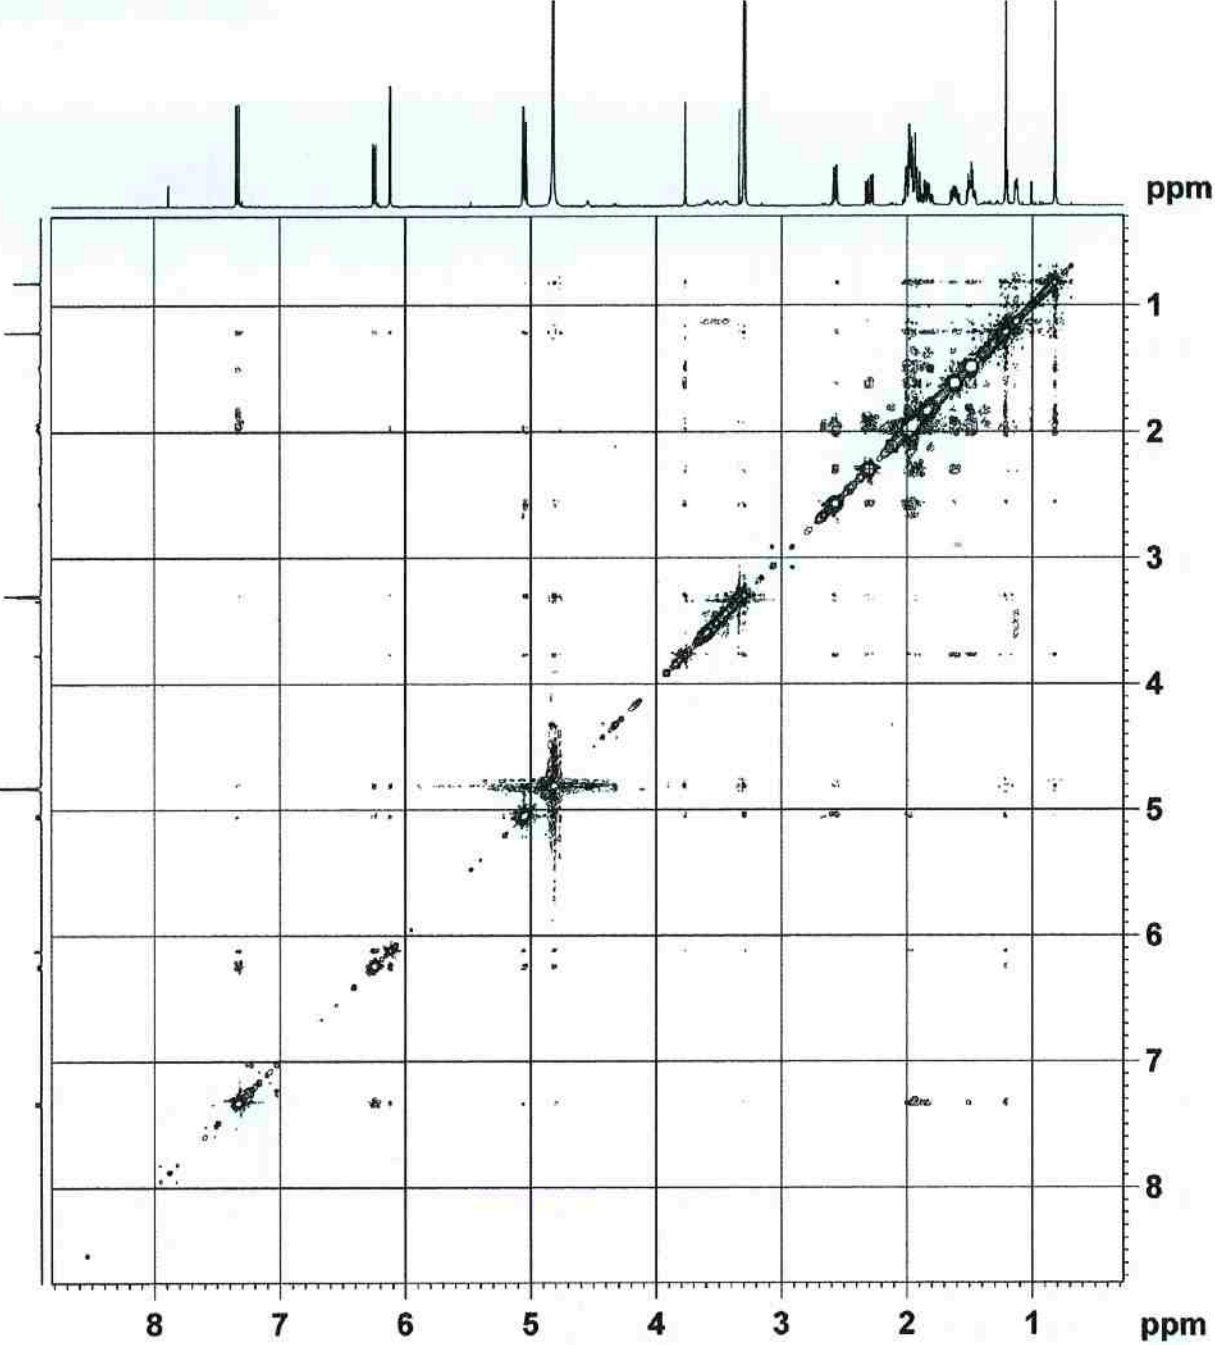

NAME may29-12  
 EXPNO 12  
 PROCNO 1  
 Date\_ 20120529  
 Time 17.55  
 INSTRUM spect  
 PROBHD 5 mm BBI 1H/D-  
 PULPROG noesygpph  
 TD 2048  
 SOLVENT MeOD  
 NS 16  
 DS 2  
 SWH 4496.403 Hz  
 FIDRES 2.195509 Hz  
 AQ 0.2278988 sec  
 RG 362  
 DW 111.200 usec  
 DE 6.50 usec  
 TE 301.4 K  
 D0 0.00010152 sec  
 D1 1.50000000 sec  
 D8 0.80000001 sec  
 D16 0.00010000 sec  
 IN0 0.00022240 sec

===== CHANNEL f1 =====  
 NUC1 1H  
 P1 7.60 usec  
 P2 15.20 usec  
 PL1 6.00 dB  
 SFO1 500.1322506 MHz

===== GRADIENT CHANNEL =====  
 GPNAM1 SINE.100  
 GP21 40.00 %  
 P16 1000.00 usec  
 ND0 1  
 TD 256  
 SFO1 500.1323 MHz  
 FIDRES 17.564074 Hz  
 SW 8.990 ppm  
 FnmODE States-TPPI  
 SI 1024  
 SF 500.1300158 MHz  
 WDW QSINE  
 SSB 2  
 LB 0.00 Hz  
 GB 0  
 PC 4.00  
 SI 1024  
 MC2 States-TPPI  
 SF 500.1300158 MHz  
 WDW QSINE  
 SSB 2  
 LB 0.00 Hz  
 GB 0
