# Supplementary material for: Microbial transformation of anti-cancer steroid exemestane and cytotoxicity of its metabolites against cancer cell lines
Source: PubMed Central journal article supplement (PMC3637571; doi:10.1186/1752-153x-7-57), 2013-03-27
Supplement: 1752-153X-7-57-S4.pdf [file 1752-153X-7-57-S4.pdf]

Scan: 11  
Base: m/z 298; 77.7%FS TIC: 23083178

R.T.: .88

#Ions: 282

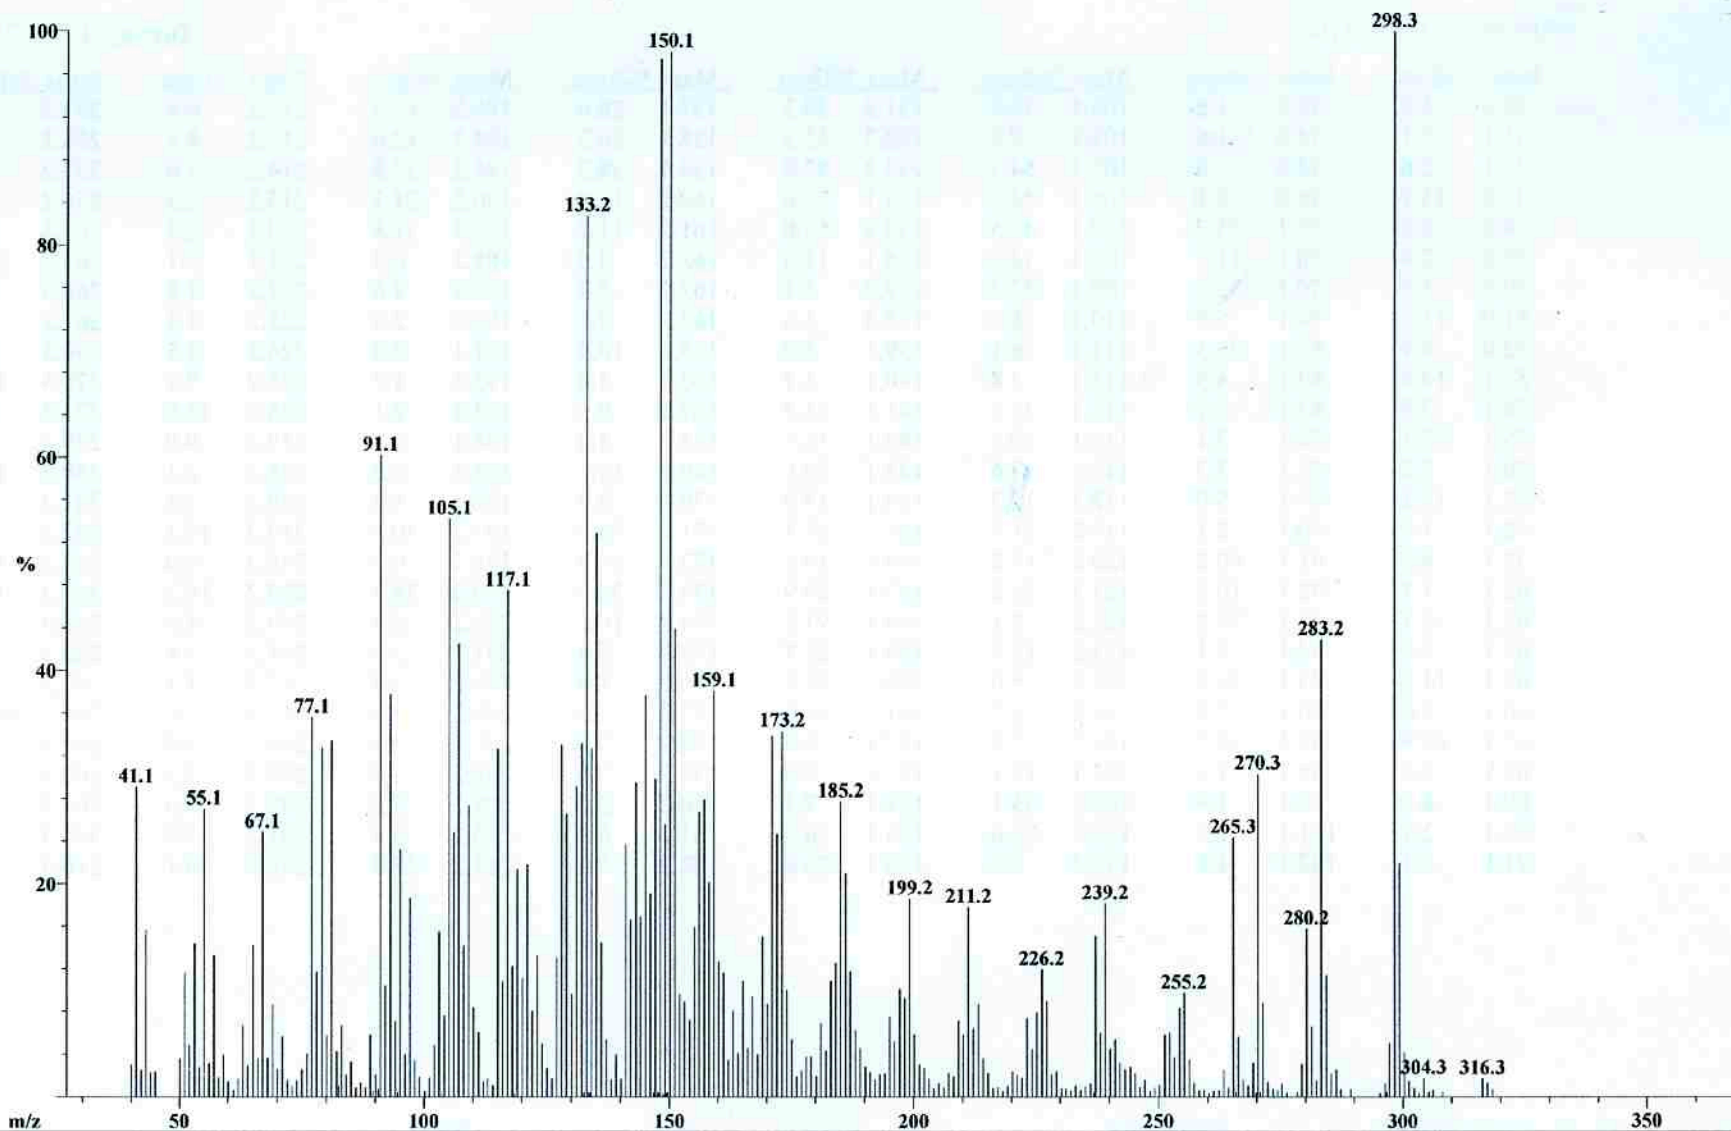

# Scan Graph

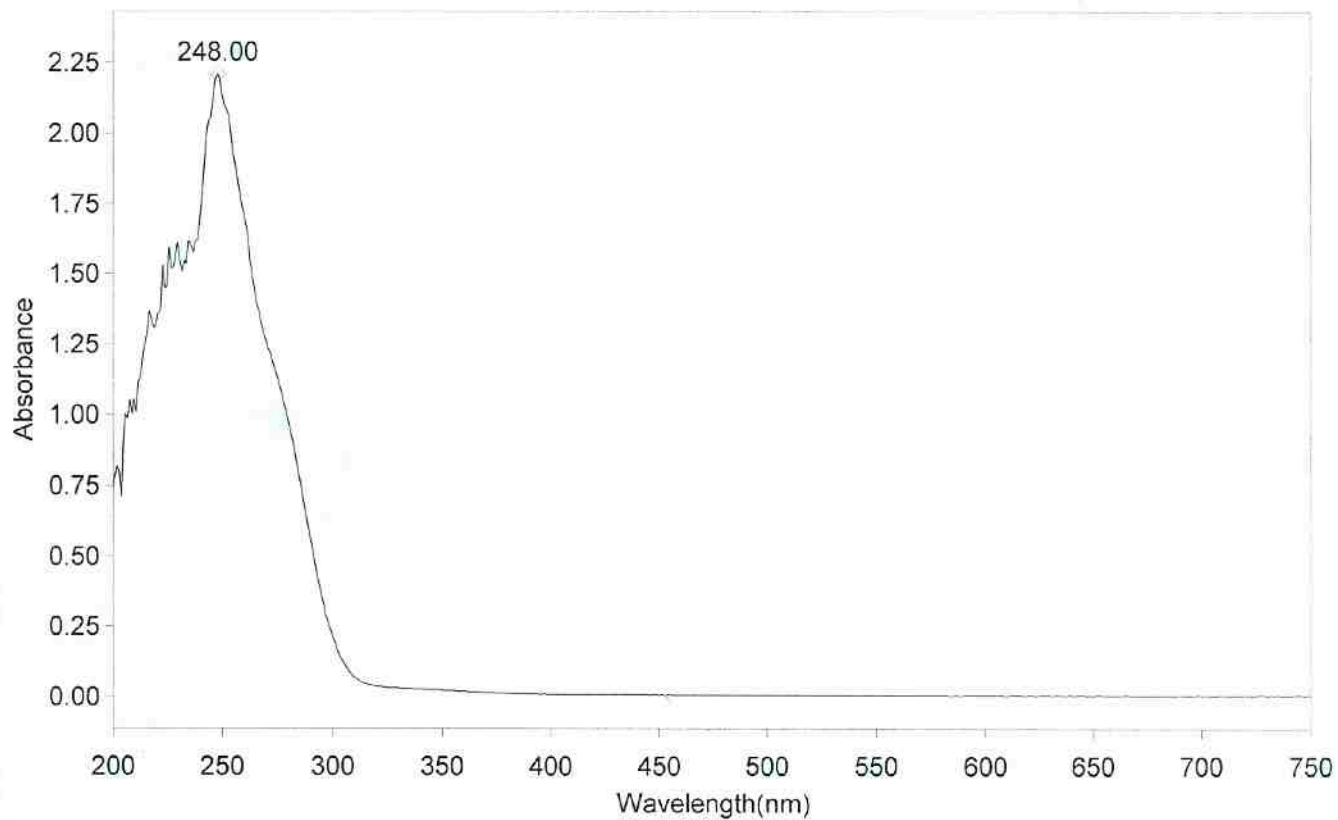

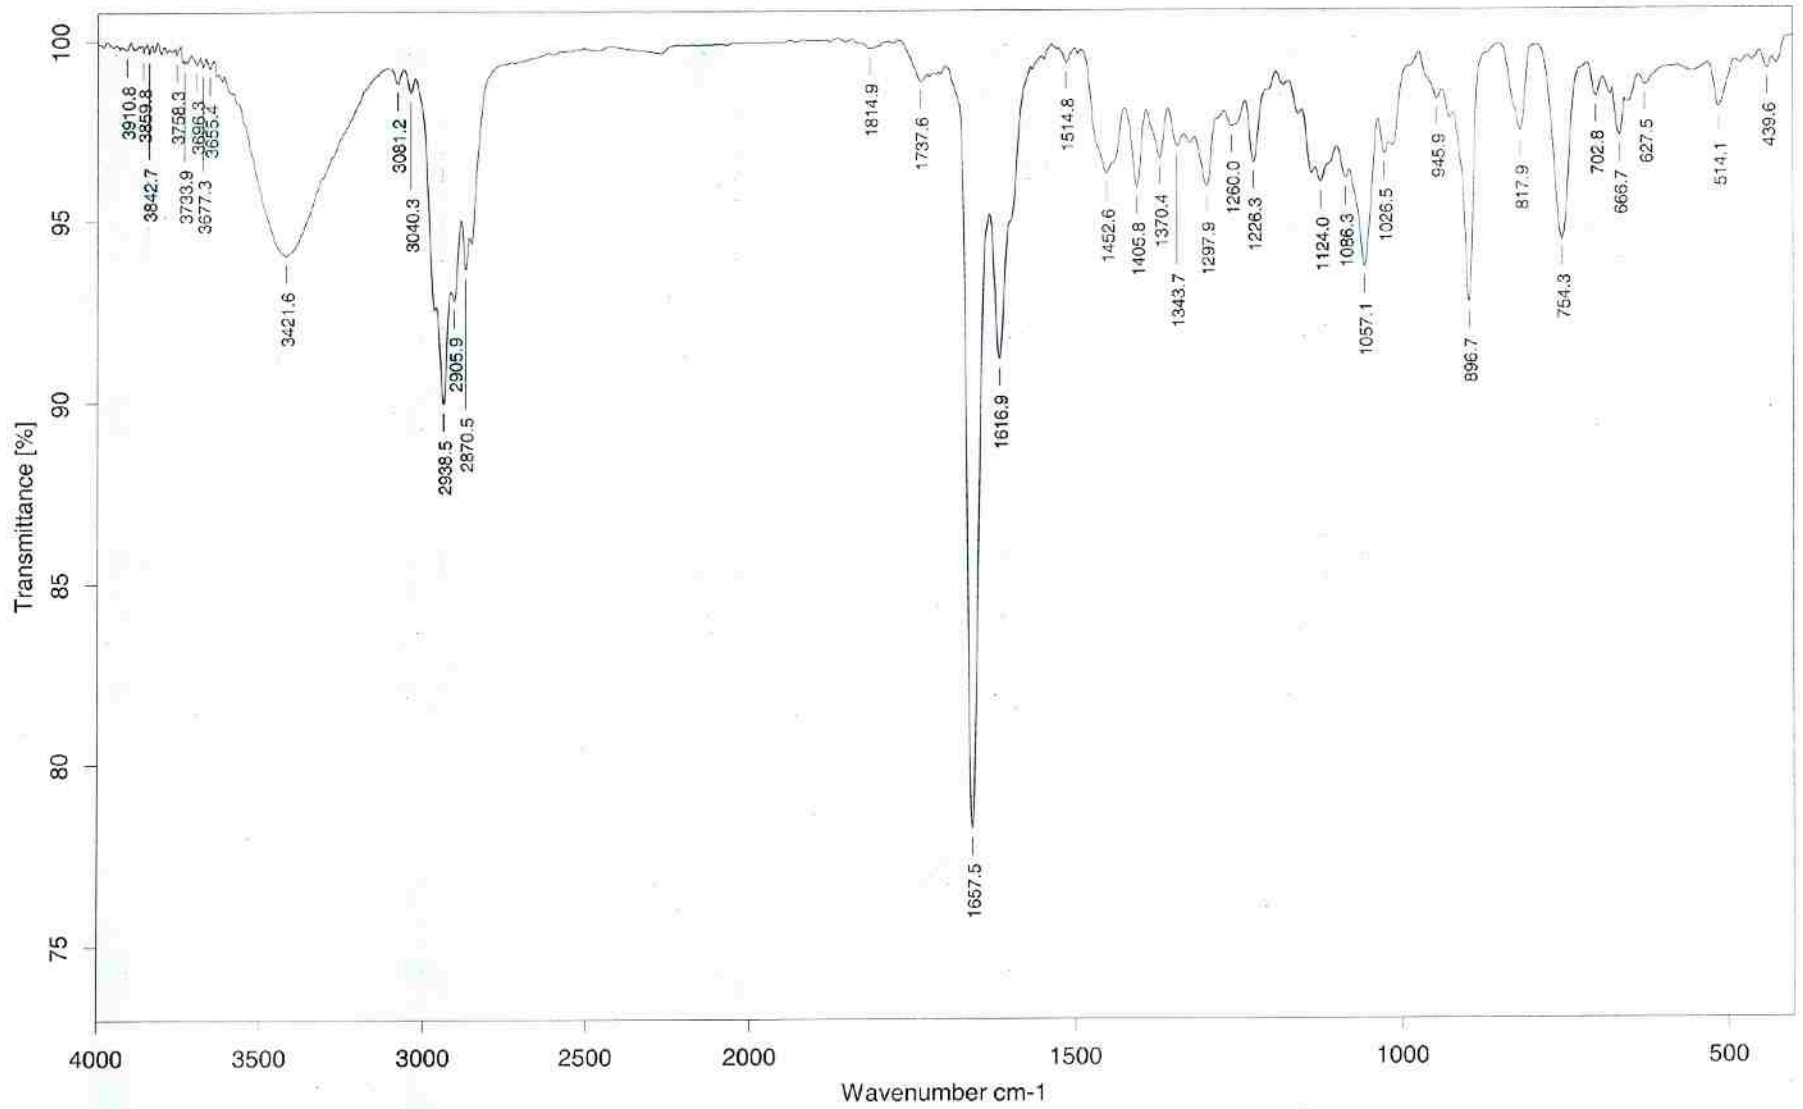

7.334  
 7.300  
 6.241  
 6.235  
 6.207  
 6.201  
 6.096  
 6.089  
 5.019  
 5.014  
 4.998  
 4.826  
 3.773  
 3.733  
 3.616  
 3.588  
 3.559  
 3.311  
 3.306  
 3.300  
 3.295  
 3.289  
 2.580  
 2.550  
 1.989  
 1.970  
 1.942  
 1.930  
 1.920  
 1.888  
 1.880  
 1.848  
 1.820  
 1.802  
 1.789  
 1.777  
 1.764  
 1.393  
 1.375  
 1.354  
 1.335  
 1.281  
 1.177  
 1.141  
 1.126  
 1.083  
 0.809

AVANCE AV-300  
 LAB NO: 115

NAME           april18-12  
 EXPNO           2  
 PROCNO          1  
 Date            20120418  
 Time            11.14  
 INSTRUM        spect  
 PROBHD         5 mm BBO BB-1H  
 PULPROG        zg30  
 TD              32768  
 SOLVENT        MeOD  
 NS              128  
 DS              0  
 SWH             5995.204 Hz  
 FIDRES          0.182959 Hz  
 AQ              2.7329011 sec  
 RG              322.5  
 DW              83.400 usec  
 DE              6.50 usec  
 TE              300.0 K  
 D1              2.00000000 sec  
 TDO             1

----- CHANNEL f1 -----  
 NUC1            1H  
 P1              7.30 usec  
 PL1             -3.00 dB  
 SFO1            300.1324010 MHz  
 SI              16384  
 SF              300.1300075 MHz  
 WDW             EM  
 SSB             0  
 LB              0.30 Hz  
 GB              0  
 PC              0.50

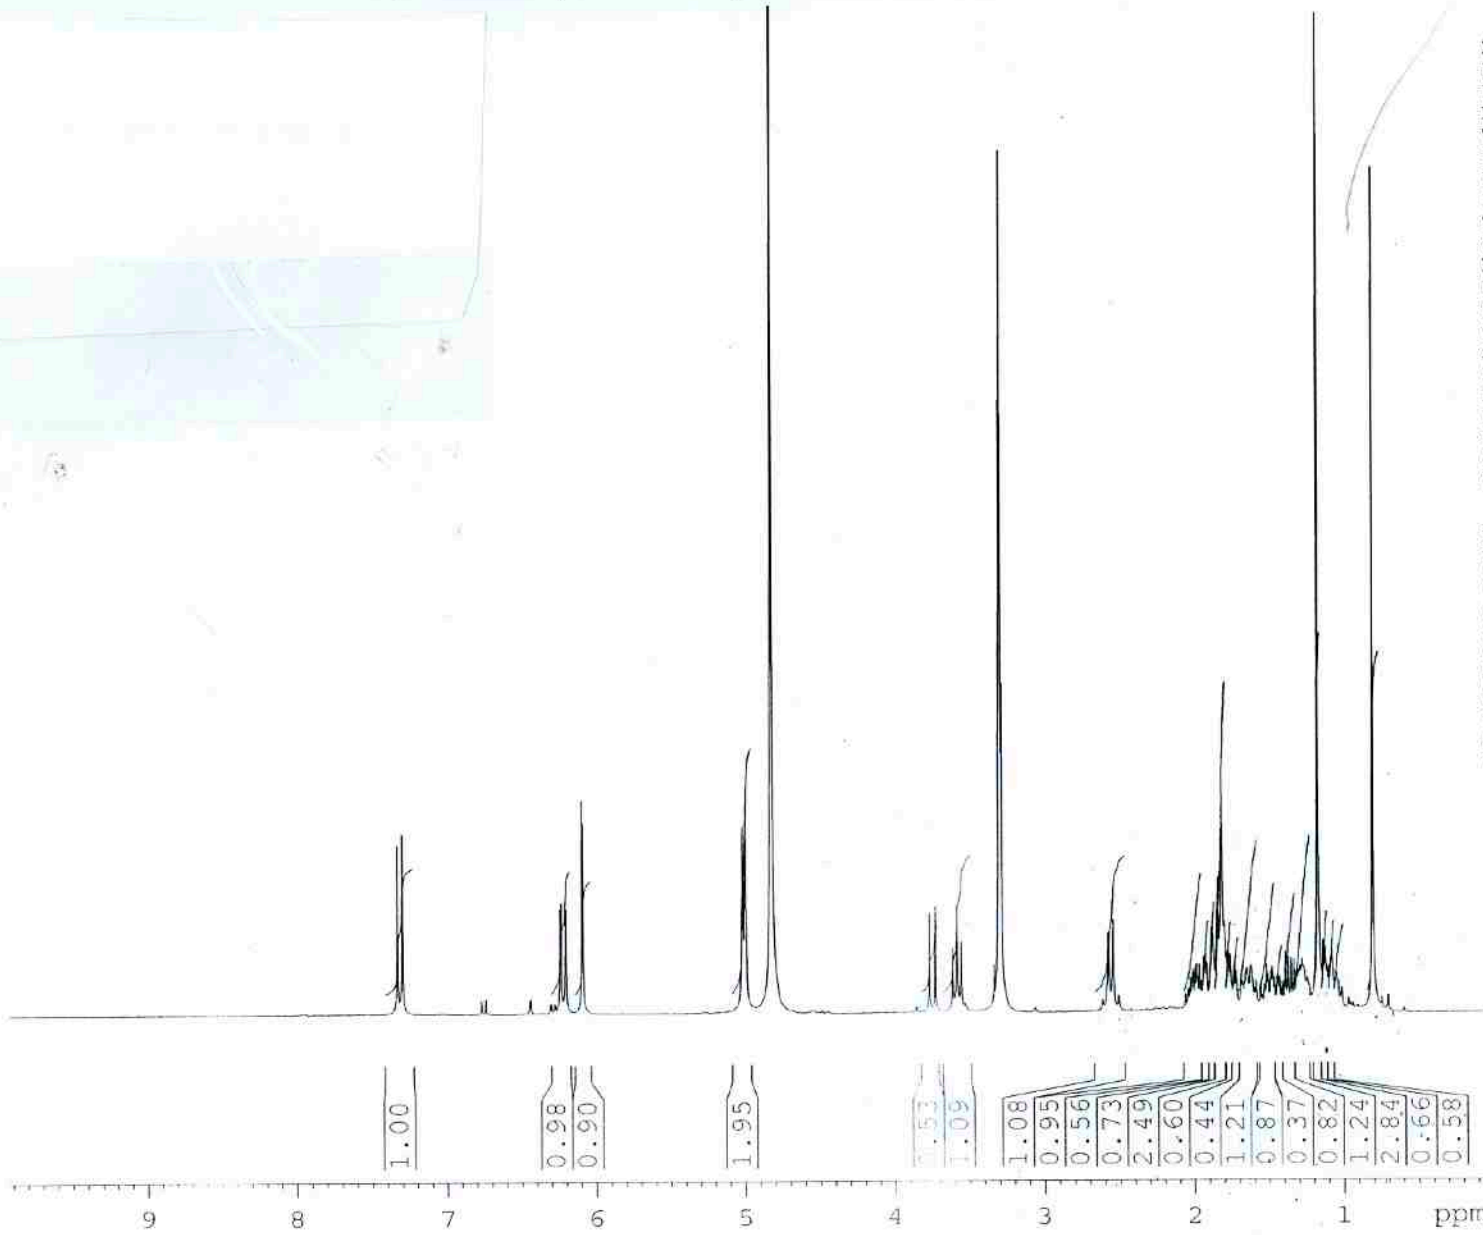

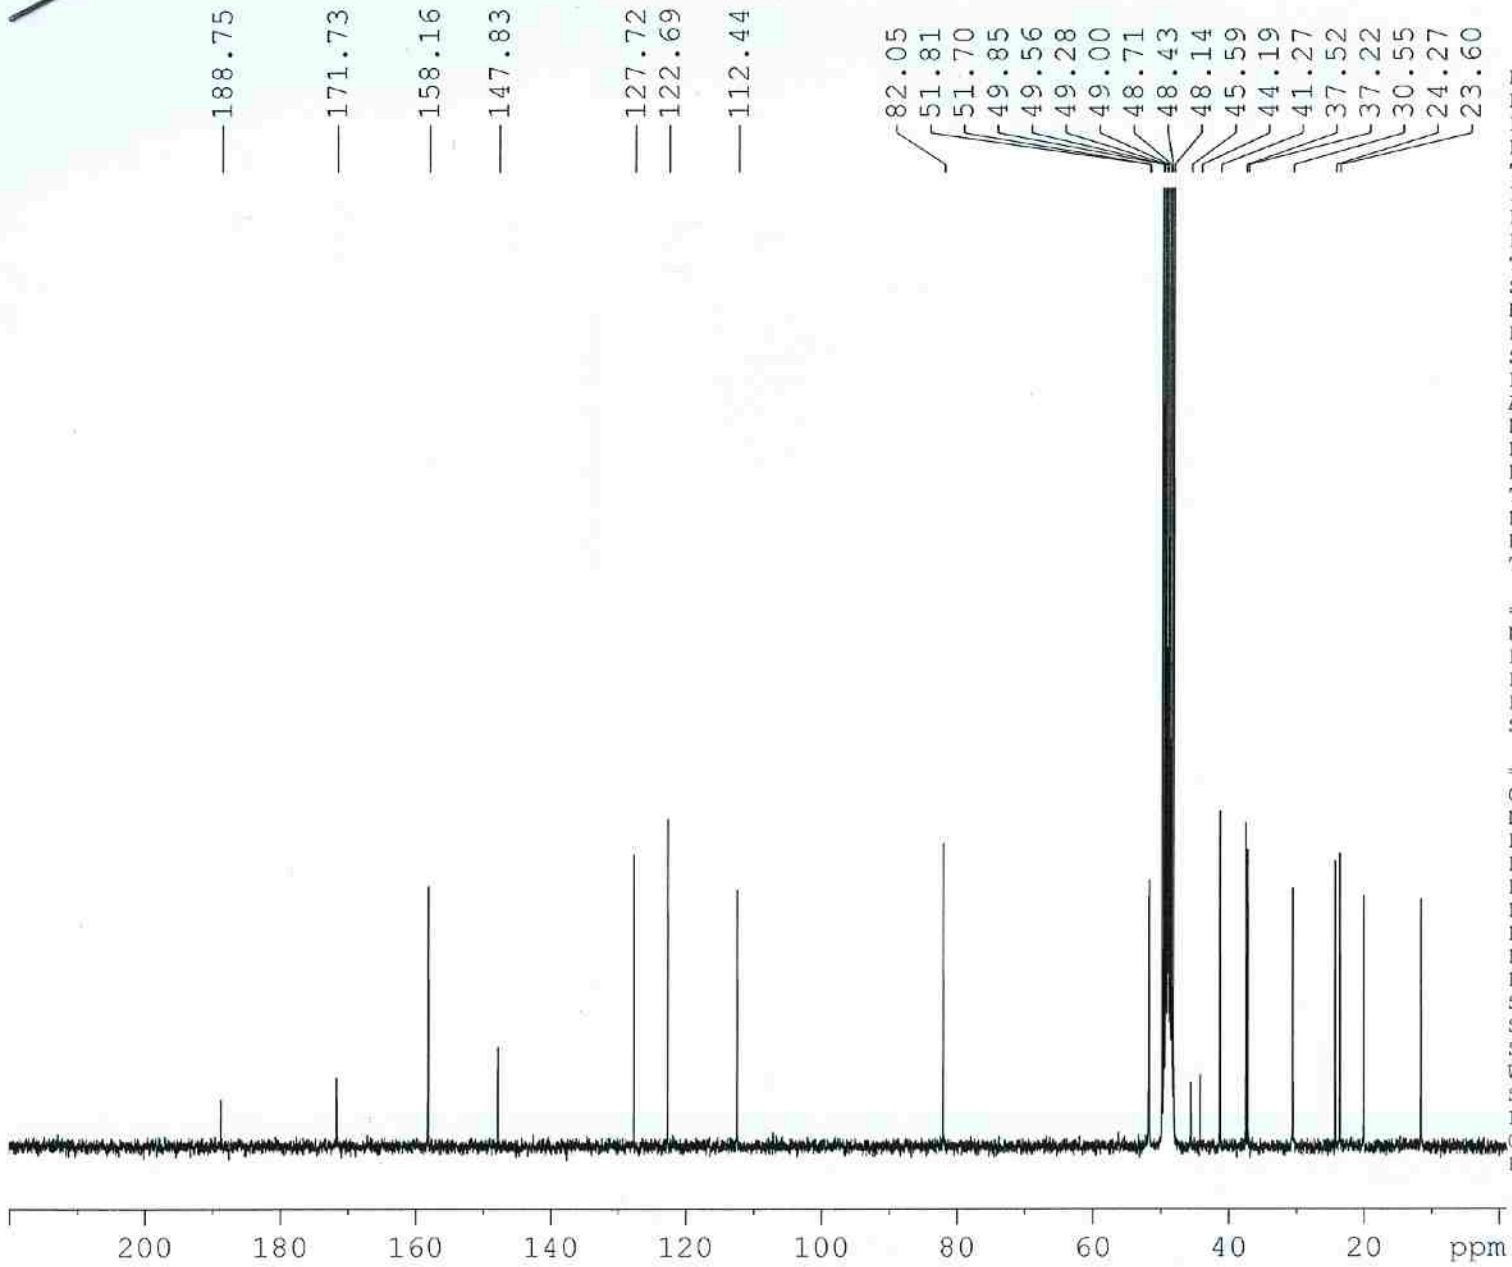

```

NAME          may16
EXPNO         7
PROCNO        1
Date_         20120516
Time_         16.19
INSTRUM       Spect
PROBHD        5 mm BBO BB-1H
PULPROG       zgpg
TD            32768
SOLVENT       MeOD
NS            20480
DS            2
SWH           18028.846 Hz
FIDRES        0.550197 Hz
AQ            0.9088159 sec
RG            28.5
DW            27.733 usec
DE            6.50 usec
TE            300.0 K
D1            1.5000000 sec
D11           0.0300000 sec
TD0           20
  
```

```

===== CHANNEL f1 =====
NUC1          13C
P1            11.00 usec
PL1           0.00 dB
PL1W          28.88669395 W
SFO1          75.4764278 MHz
  
```

```

===== CHANNEL f2 =====
CPDPRG2       waltz16
NUC2          1H
PCPD2         80.00 usec
PL2           120.00 dB
PL12          17.00 dB
PL13          17.00 dB
PL2W          0.0000000 W
PL12W         0.26262212 W
PL13W         0.26262212 W
SFO2          300.1315007 MHz
SI            16384
SF            75.4676422 MHz
WDW           EM
SSB           0
LB            1.00 Hz
GB            0
PC            1.40
  
```

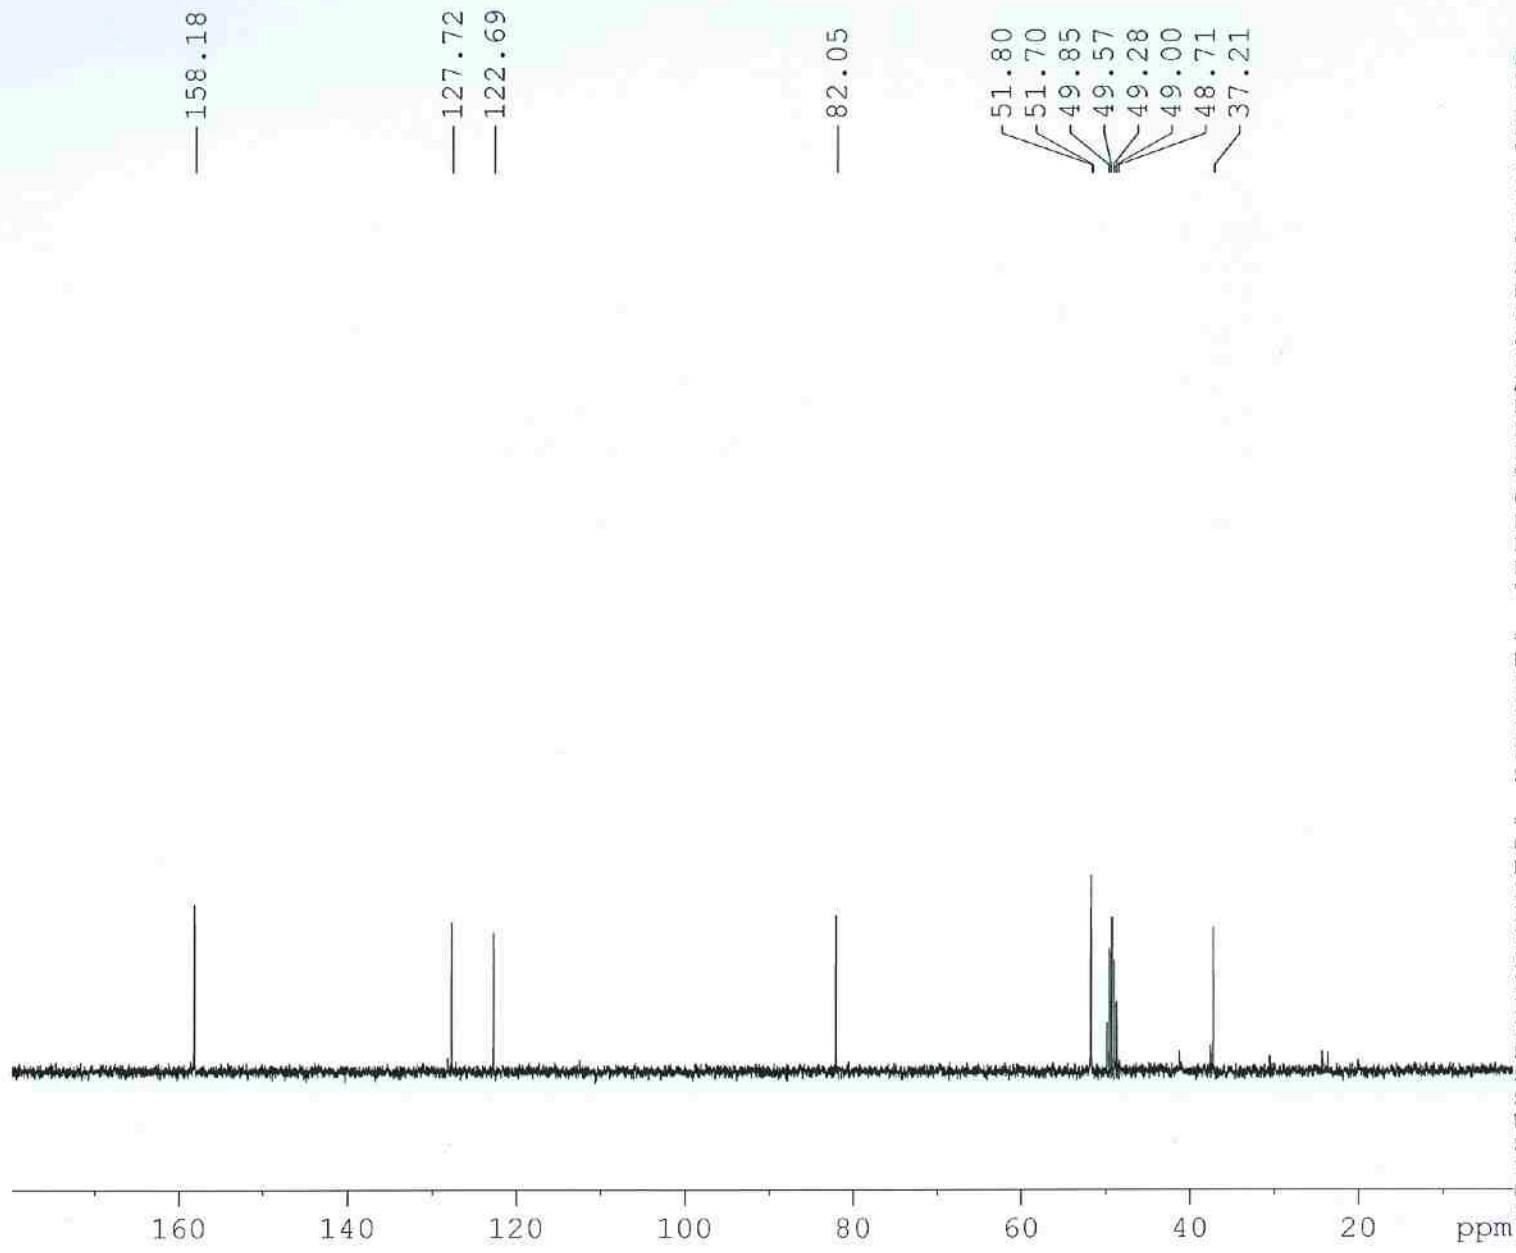

```

NAME          may16
EXPNO         9
PROCNO       1
Date_        20120517
Time         9.40
INSTRUM      Spect
PROBHD       5 mm BBO BB-1H
PULPROG      dept90
TD           32768
SOLVENT      MeOD
NS           5106
DS           2
SWH          14367.816 Hz
FIDRES       0.438471 Hz
AQ           1.1403764 sec
RG           203
DW           34.800 usec
DE           6.50 usec
TE           300.0 K
CNST2       145.0000000
D1           1.50000000 sec
D2           0.00344828 sec
D12          0.00002000 sec
TD0          8
  
```

```

===== CHANNEL f1 =====
NUC1          13C
P1            11.00 usec
P2            22.00 usec
PL1           0.00 dB
PL1W          28.88669395 W
SFO1          75.4749184 MHz
  
```

```

===== CHANNEL f2 =====
CPDPRG2      waltz16
NUC2          1H
P3            12.00 usec
P4            24.00 usec
PCPD2        80.00 usec
PL2           0.00 dB
PL12         17.00 dB
PL2W         13.16228485 W
PL12W        0.26262212 W
SFO2         300.1315007 MHz
SI           16384
SF           75.4676422 MHz
WDW          EM
SSB          0
LB           1.00 Hz
GB           0
PC           1.00
  
```



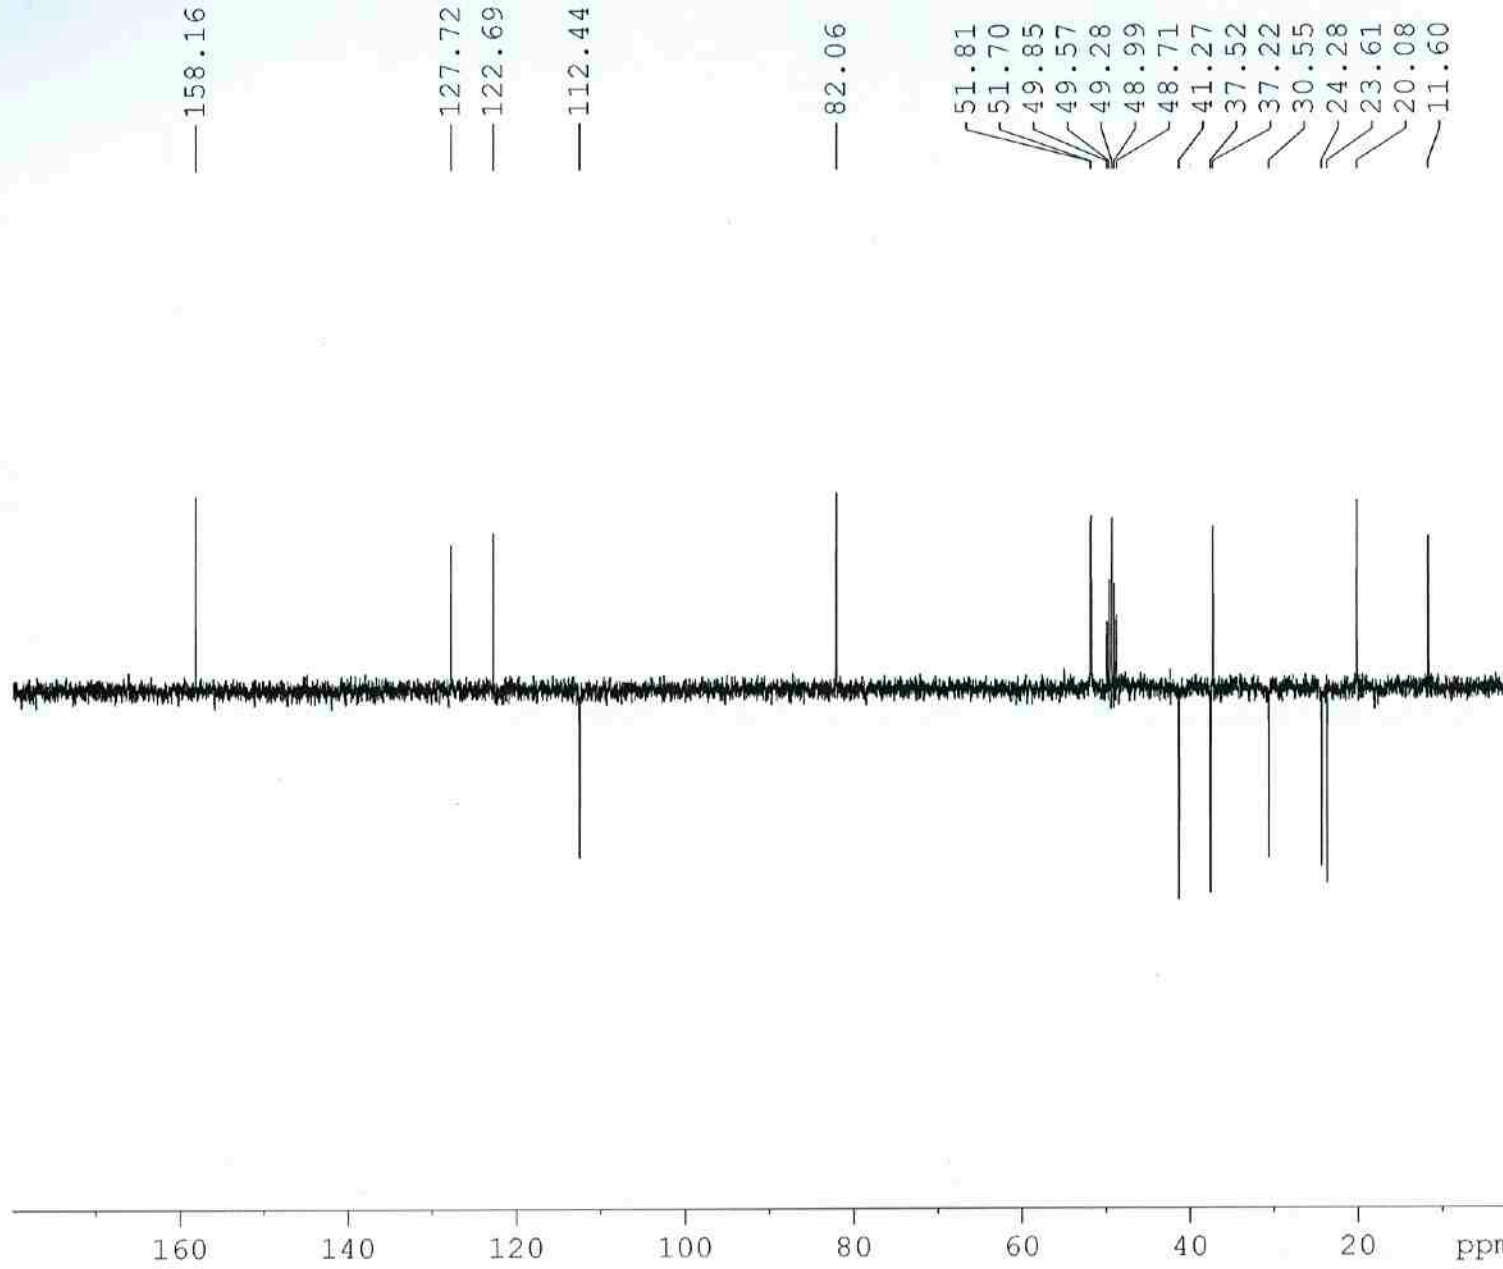

```

NAME          may16
EXPNO         8
PROCNO        1
Date_         20120517
Time_         6.59
INSTRUM       Spect
PROBHD        5 mm BBO BB-1H
PULPROG       dept135
TD            32768
SOLVENT       MeOD
NS            3596
DS            2
SWH           14367.816 Hz
FIDRES        0.438471 Hz
AQ            1.1403764 sec
RG            203
DW            34.800 usec
DE            6.50 usec
TE            300.0 K
CNST2         145.0000000
D1            1.50000000 sec
D2            0.00344828 sec
D12           0.00002000 sec
TDO           12

===== CHANNEL f1 =====
NUC1          13C
P1            11.00 usec
P2            22.00 usec
PL1           0.00 dB
PL1W          28.88669395 W
SFO1          75.4749184 MHz

===== CHANNEL f2 =====
CPDPRG2       waltz16
NUC2          1H
P3            12.00 usec
P4            24.00 usec
PCPD2         80.00 usec
PL2           0.00 dB
PL12          17.00 dB
PL2W          13.16228485 W
PL12W         0.26262212 W
SFO2          300.1315007 MHz
SI            16384
SF            75.4676422 MHz
WDW           EM
SSB           0
LB            1.00 Hz
GB            0
PC            1.00

```

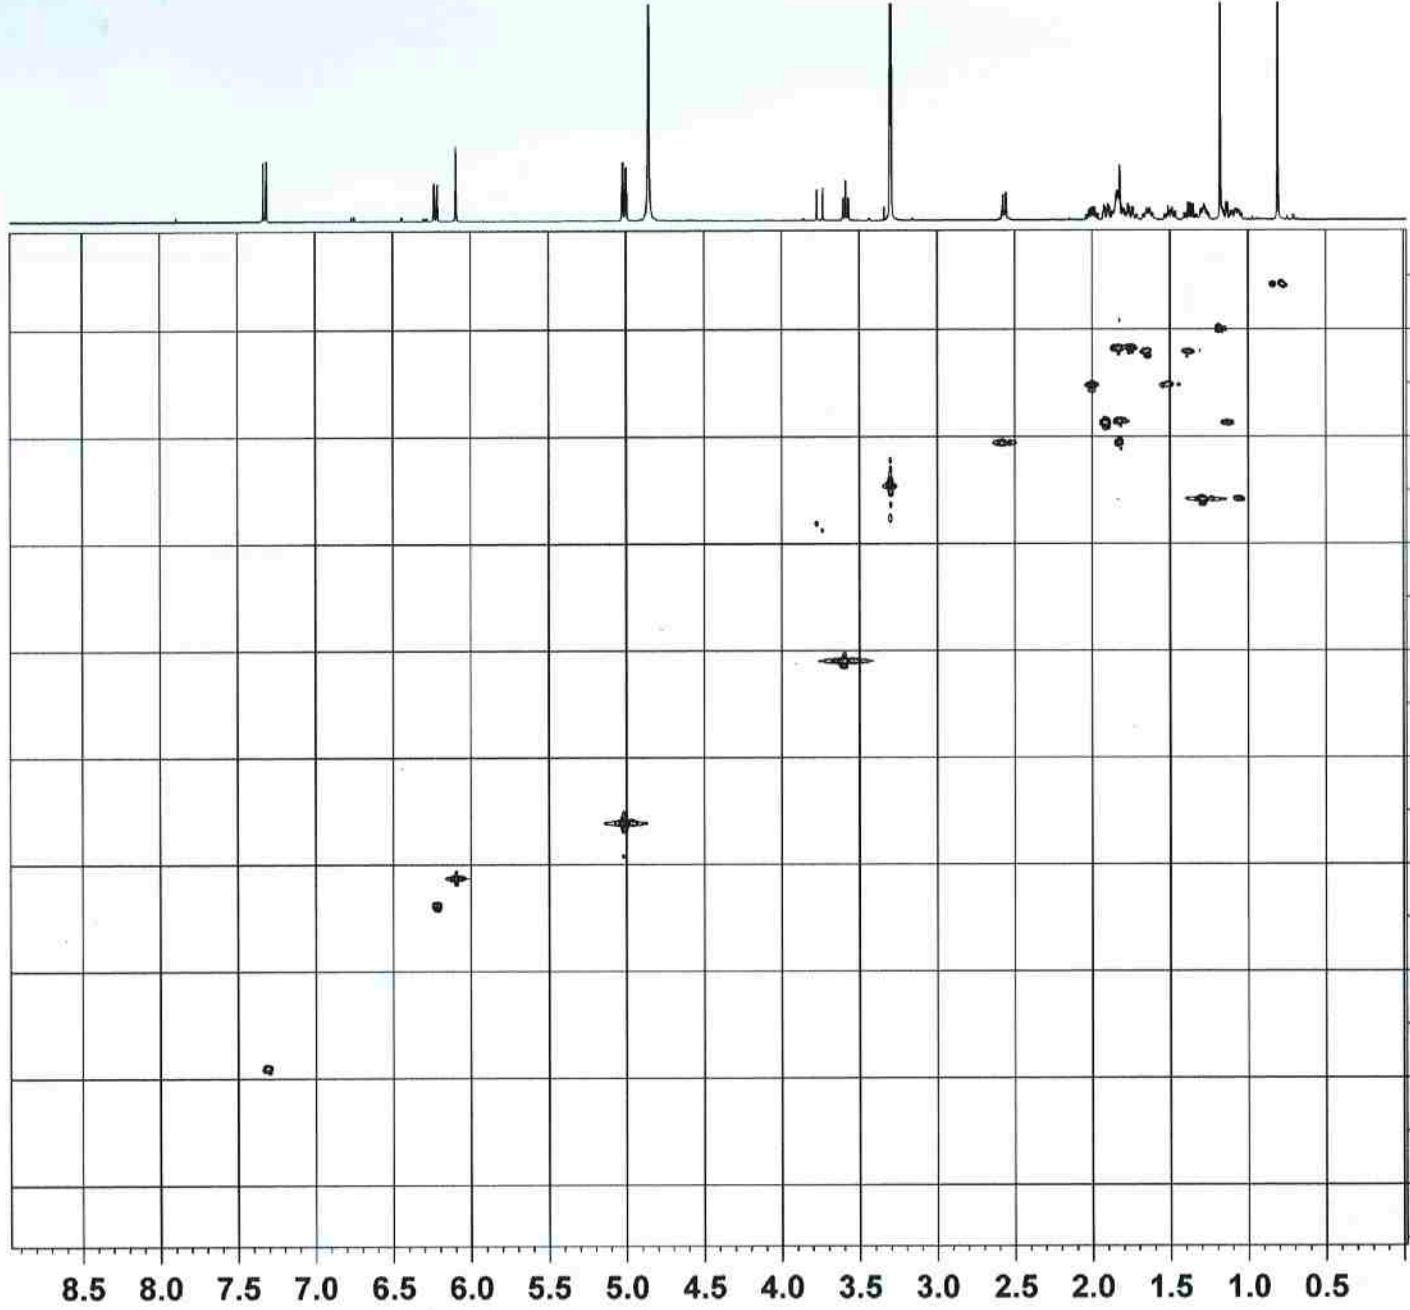

```

NAME          apr26-12
EXPNO         9
PROCNO        1
Date_         20120426
Time          18.24
INSTRUM       spect
PROBHD        5 mm BBI 1H/D-
PULPROG       hsqcetgpsi
TD            1024
SOLVENT       MeOD
NS            32
DS            8
SWH           4496.403 Hz
FIDRES        4.391018 Hz
AQ            0.1140300 sec
RG            23170.5
DW            111.200 usec
DE            6.50 usec
TE            298.8 K
CNST2         145.0000000
DC            0.00000300 sec
D1            1.50000000 sec
D4            0.00172414 sec
D11           0.03000000 sec
D13           0.00000400 sec
D16           0.00010000 sec
D24           0.00110000 sec
INO           0.00002090 sec
ZGPTNS

----- CHANNEL f1 -----
NUC1          1H
P1            7.60 usec
P2            15.20 usec
P28           0.00 usec
PL1           6.00 dB
SFO1          500.1322506 MHz

----- CHANNEL f2 -----
CPDPRG2       garp
NUC2          13C
P3            13.25 usec
P4            26.50 usec
PCPD2         65.00 usec
PL2           -2.85 dB
PL12          9.65 dB
SFO2          125.7697360 MHz

----- GRADIENT CHANNEL -----
GPNAM1        SINE.100
GPNAM2        SINE.100
GPZ1          80.00 %
GPZ2          20.10 %
P16           1000.00 usec
NDC           2
TD            256
SFO1          125.7697 MHz
FIDRES        93.344727 Hz
SW            190.000 ppm
FnMODE        Echo-Antiecho
SI            1024
SF            500.1300158 MHz
WDW           QSINE
SSB           2
LB            0.00 Hz
GB            0
PC            4.00
SI            1024
MC2           echo-antiecho
SF            125.7576112 MHz
WDW           QSINE
SSB           2
LB            0.00 Hz
GB            0
  
```



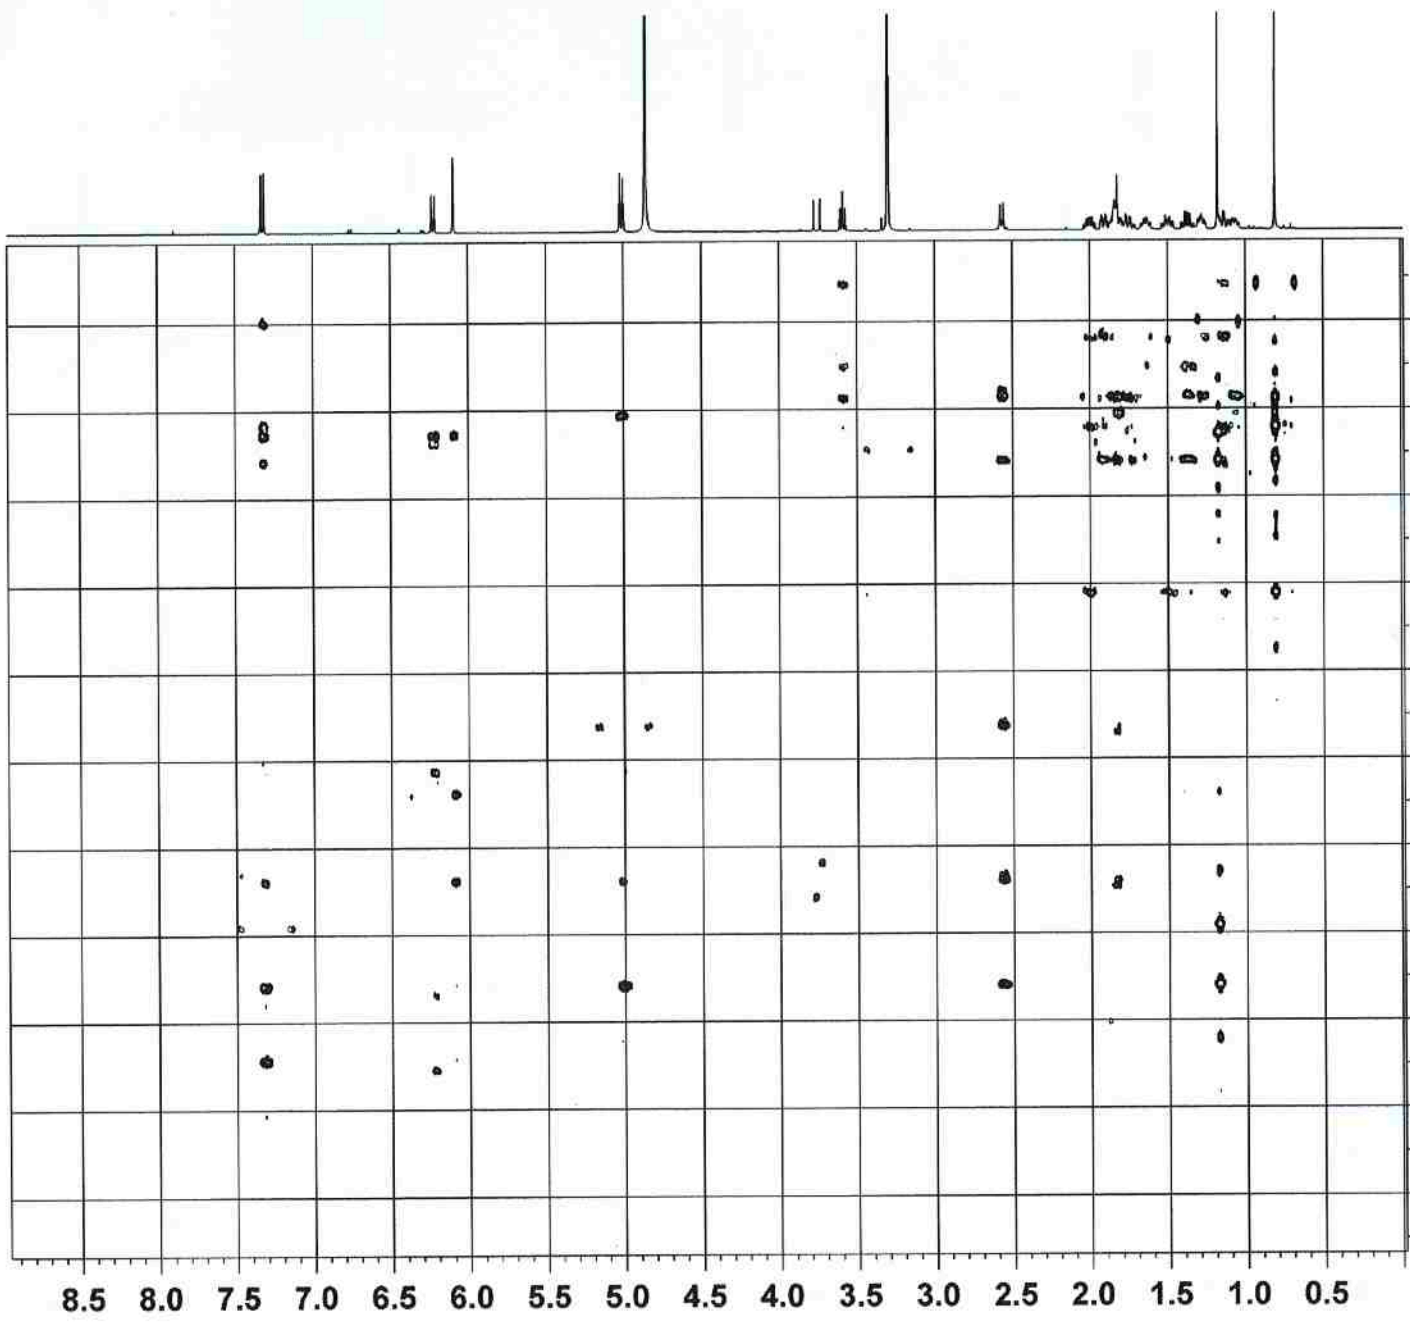

NAME apr26-12  
 EXPNO 10  
 PROCNO 1  
 Date\_ 20120426  
 Time 22.09  
 INSTRUM spect  
 PROBHD 5 mm BBI 1H/D-  
 PULPROG hmbcggplpndqf  
 TD 4096  
 SOLVENT MeOD  
 NS 64  
 DS 8  
 SWH 4496.403 Hz  
 FIDRES 1.097755 Hz  
 AQ 0.4556364 sec  
 RG 23170.5  
 DW 111.200 usec  
 DE 6.50 usec  
 TE 301.5 K  
 CNST2 145.0000000  
 CNST13 20.0000000  
 D0 0.00000300 sec  
 D1 2.00000000 sec  
 D2 0.00344828 sec  
 D6 0.05000000 sec  
 D16 0.00010000 sec  
 IN0 0.00001715 sec

----- CHANNEL f1 -----  
 NUC1 1H  
 P1 7.60 usec  
 P2 15.20 usec  
 PL1 6.00 dB  
 SFO1 500.1322506 MHz

----- CHANNEL f2 -----  
 NUC2 13C  
 P3 13.25 usec  
 PL2 -2.85 dB  
 SFO2 125.7723769 MHz

----- GRADIENT CHANNEL -----  
 GPNAM1 SINE.100  
 GPNAM2 SINE.100  
 GPNAM3 SINE.100  
 GPZ1 50.00 %  
 GPZ2 30.00 %  
 GPZ3 40.10 %  
 P16 1000.00 usec  
 NDU 2  
 TD 256  
 SFO1 125.7724 MHz  
 FIDRES 113.981216 Hz  
 SW 232.000 ppm  
 FMODE QF  
 SI 1024  
 SF 500.1300158 MHz  
 WDW QSINE  
 SSB 0  
 LB 0.00 Hz  
 GB 0  
 EC 4.00  
 SI 1024  
 MC2 QF  
 SF 125.7576112 MHz  
 WDW QSINE  
 SSB 0  
 LB 0.00 Hz  
 GB 0

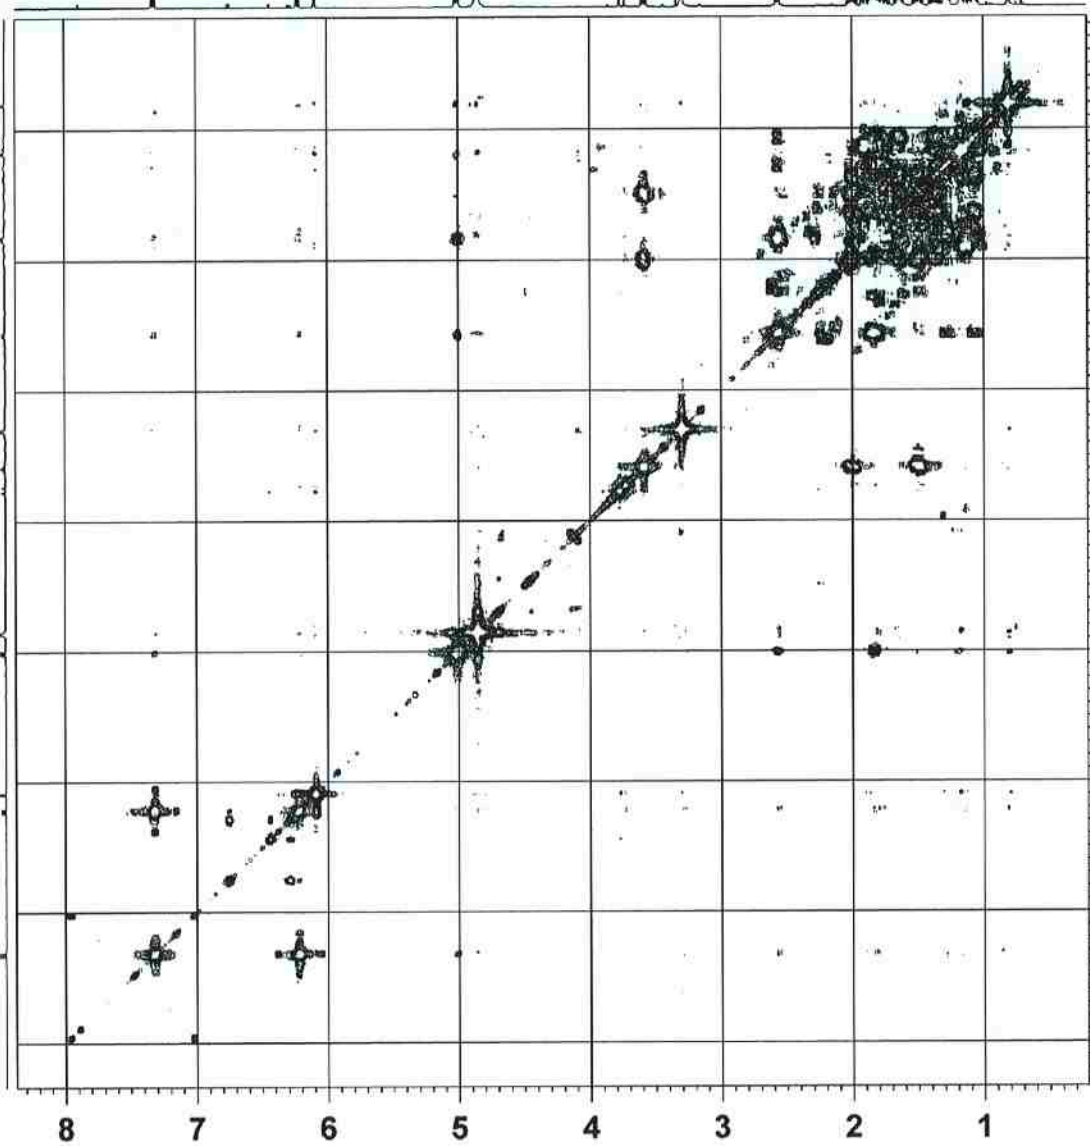

ppm

```

NAME          apr26-12
EXPNO         7
PROCNO        1
Date_         20120426
Time_         14.29
INSTRUM       spect
PROBHD        5 mm BBI 1H/D-
PULPROG       cosygppqf
TD            2048
SOLVENT       MeOD
NS            8
DS            8
SWH           4496.403 Hz
FIDRES        2.195509 Hz
AQ            0.2278988 sec
RG            574.7
DW            111.200 usec
DE            6.50 usec
TE            297.0 K
D0            0.00000300 sec
D1            1.50000000 sec
D13           0.00000400 sec
D16           0.00010000 sec
IN0           0.00022240 sec
  
```

```

===== CHANNEL f1 =====
NUC1          1H
P0            7.60 usec
P1            7.60 usec
PL1           6.00 dB
SFO1          500.1322506 MHz
  
```

```

===== GRADIENT CHANNEL =====
GPNAM1       SINE.100
GPZ1         10.00 %
P16          1000.00 usec
ND0          1
TD           256
SFO1         500.1323 MHz
FIDRES       17.564074 Hz
SW           8.990 ppm
FnMODE       QF
SI           1024
SF           500.1300158 MHz
WDW          SINE
SSB          0
LB           0.00 Hz
GB           0
PC           4.00
SI           1024
MC2          QF
SF           500.1300158 MHz
WDW          SINE
SSB          0
LB           0.00 Hz
GB           0
  
```

8 7 6 5 4 3 2 1 ppm

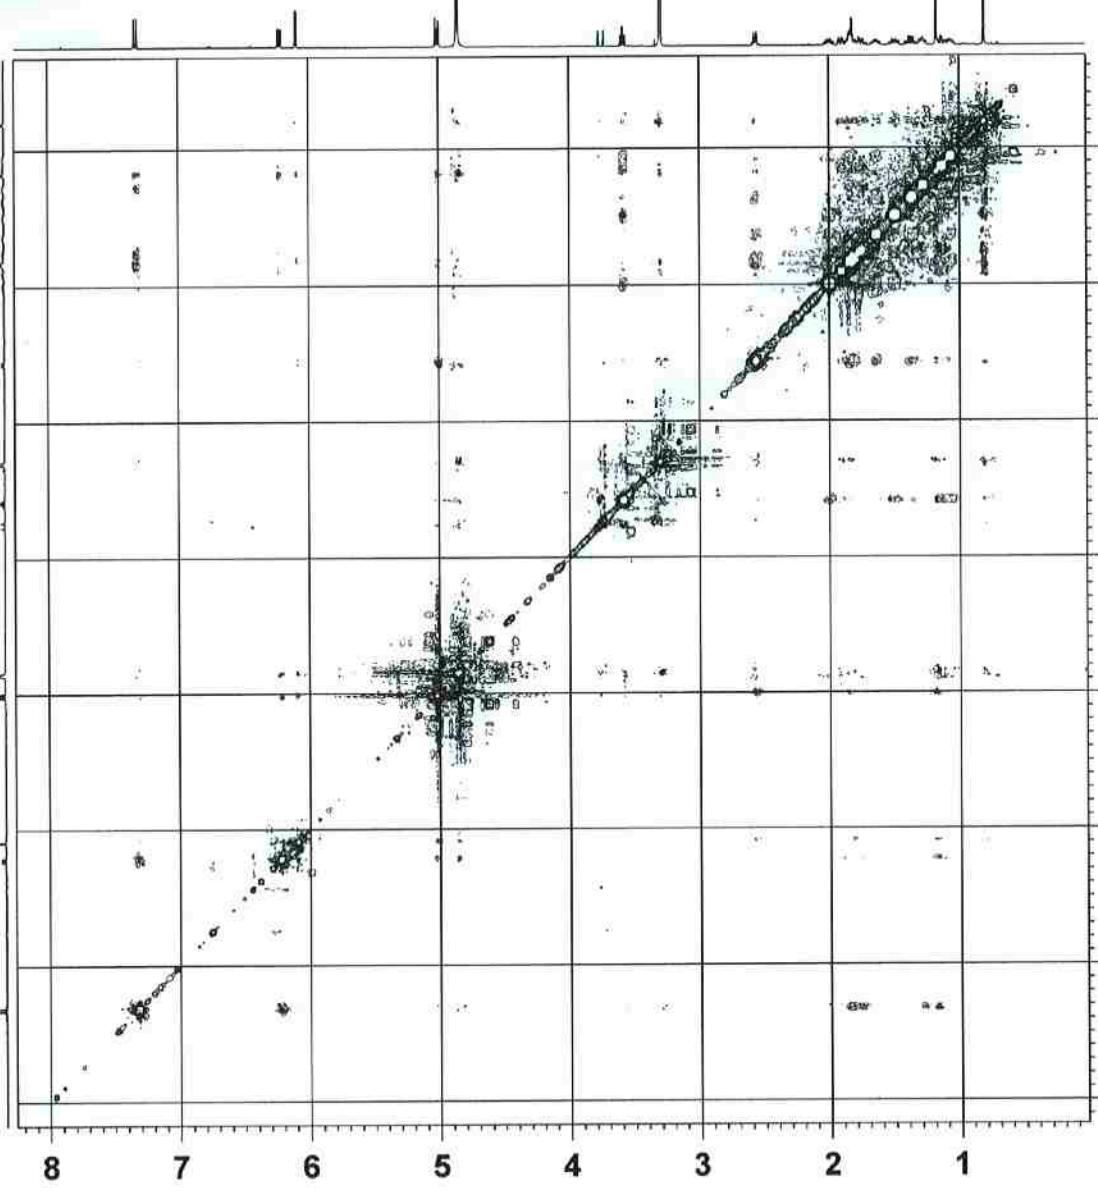

ppm

```

NAME          apr26-12
EXPNO         8
PROCNO        1
Date_         20120426
Time          15.30
INSTRUM       spect
PROBHD        5 mm BBI 1H/D-
PULPROG       noesygpph
TD            2048
SOLVENT       MeOD
NS            16
DS            2
SWH           4496.403 Hz
FIDRES        2.195509 Hz
AQ            0.2278988 sec
RG            574.7
DW            111.200 usec
DE            6.50 usec
TE            296.9 K
D0            0.00010152 sec
D1            1.50000000 sec
D8            0.80000001 sec
D16           0.00010000 sec
IN0           0.00022240 sec
    
```

```

----- CHANNEL f1 -----
NUC1          1H
P1            7.60 usec
P2            15.20 usec
PL1           6.00 dB
SFO1          500.1322506 MHz
    
```

```

===== GRADIENT CHANNEL =====
GPNAM1        SINE.100
GPZ1          40.00 %
P16           1000.00 usec
ND0           1
TD            256
SFO1          500.1323 MHz
FIDRES        17.564074 Hz
SW            8.990 ppm
FnMODE        States-TPPI
SI            1024
SF            500.1300158 MHz
WDW           QSINE
SSB           2
LB            0.00 Hz
GB            0
PC            4.00
SI            1024
MC2           States-TPPI
SF            500.1300158 MHz
WDW           QSINE
SSB           2
LB            0.00 Hz
GB            0
    
```

ppm
